# Supplementary material for: How RNase HI ( Escherichia coli ) promoted site-selective hydrolysis works on RNA in duplex with carba-LNA and LNA substituted antisense strands in an antisense strategy context?
Source: Royal Society of Chemistry journal article supplement (doi:10.1039/c6mb00762g), 2017-02-24
Supplement: c6mb00762g2.pdf [file c6mb00762g2.pdf]

## Supporting Information-Part II

### **How RNase HI (*Escherichia coli*) promoted site-selective hydrolysis works on RNA in duplex with carba-LNA and LNA substituted antisense strands in antisense strategy context**

Oleksandr Plashkevych\*, Qing Li, and Jyoti Chattopadhyaya\*

Chemical Biology Program, Department of Cell and Molecular Biology, Box 581,  
Biomedical Center, Uppsala University, SE-751 23 Uppsala, Sweden

\*Corresponding Authors: Chemical Biology Program, Department of Cell and Molecular Biology,  
Biomedical Centre, Uppsala University, SE-75123 Uppsala, Sweden.  
Phone: +46-18-4714577, Fax: +46-18-554495, Email: [jyoti@boc.uu.se](mailto:jyoti@boc.uu.se), [oleksandr@boc.uu.se](mailto:oleksandr@boc.uu.se)

## Table of contents:

|                                                                                                                                                                                                                                 |    |
|---------------------------------------------------------------------------------------------------------------------------------------------------------------------------------------------------------------------------------|----|
| Figure SII.1 Autoradiograms of 20% denatured PAGE showing SVPDE degradation of 5'-end <sup>32</sup> P labeled native AON and modified AON1, 4, 7, 10, 13, 16, 19, 22                                                            | 6  |
| Figure SII.2 Autoradiograms of 20% denatured PAGE showing the stability of 5'-end <sup>32</sup> P labeled native AON and modified AON1, 4, 7, 10, 13, 16, 19, 22 in human blood serum                                           | 6  |
| Figure SII.3 Autoradiograms of 20% denaturing PAGE pictures, showing the cleavage kinetics of 5'- <sup>32</sup> P-labeled target RNA by <i>E. coli</i> RNase HI in the cLNA-A and LNA-A modified AON/RNA hybrids                | 7  |
| Figure SII.4 Autoradiograms of 20% denaturing PAGE pictures, showing the cleavage kinetics of 5'- <sup>32</sup> P-labeled target RNA by <i>E. coli</i> RNase HI in the LNA-G and cLNA-G modified AON/RNA hybrids                | 8  |
| Figure SII.5 Autoradiograms of 20% denaturing PAGE pictures, showing the cleavage kinetics of 5'- <sup>32</sup> P-labeled target RNA by <i>E. coli</i> RNase HI in the LNA-C and cLNA- <sup>Me</sup> C modified AON/RNA hybrids | 9  |
| Figure SII.6 Autoradiograms of 20% denaturing PAGE pictures, showing the cleavage kinetics of 5'- <sup>32</sup> P-labeled target RNA by <i>E. coli</i> RNase HI in the LNA-T and cLNA-T modified AON/RNA hybrids                | 10 |
| Figure SII.7 Plots of $T_m^{-1}$ vs $\ln(C_0/4)$ for native AON/RNA and AONs 1-9/RNA duplexes obtained from concentration-dependent $T_m$ measurement                                                                           | 11 |
| Figure SII.8 Plots of $T_m^{-1}$ vs $\ln(C_0/4)$ for AONs 10-21/RNA duplexes obtained from concentration-dependent $T_m$ measurement                                                                                            | 12 |
| Figure SII.9 Plots of $T_m^{-1}$ vs $\ln(C_0/4)$ for AONs 22-24/RNA, native AON/DNA and AONs 1-6/DNA duplexes obtained from concentration-dependent $T_m$ measurement                                                           | 13 |
| Figure SII.10 Plots of $T_m^{-1}$ vs $\ln(C_0/4)$ for AONs 7-18/DNA duplexes obtained from concentration-dependent $T_m$ measurement                                                                                            | 14 |
| Figure SII.11 Plots of $T_m^{-1}$ vs $\ln(C_0/4)$ for AONs 19-24/DNA duplexes obtained from concentration-dependent $T_m$ measurement                                                                                           | 15 |
| Figure SII.12 HPLC profile of mixtures of 7'S-Me-cLNA-A (2b) and cENA-A (2c)                                                                                                                                                    | 16 |
| Figure SII.13 HPLC profile of pure 7'S-Me-cLNA-A (2b)                                                                                                                                                                           | 17 |
| Figure SII.14 HPLC profile of pure cENA-A (2c)                                                                                                                                                                                  | 18 |
| Figure SII.15 HPLC profile of mixtures of 7'S-Me-cLNA-G (3b) and cENA-G (3c)                                                                                                                                                    | 19 |
| Figure SII.16 LC-MS profile of pure 7'S-Me-cLNA-G (3b)                                                                                                                                                                          | 20 |
| Figure SII.17 LC-MS profile of pure cENA-G (3c)                                                                                                                                                                                 | 21 |
| Figure SII.18 HPLC profile of mixtures of 7'R-Me-cLNA- <sup>Me</sup> C (4a), 7'S-Me-cLNA- <sup>Me</sup> C (4b) and cENA- <sup>Me</sup> C (4c)                                                                                   | 22 |
| Figure SII.19 HPLC profile of pure 7'R-Me-cLNA- <sup>Me</sup> C (4a)                                                                                                                                                            | 23 |
| Figure SII.20 HPLC profile of pure 7'S-Me-cLNA- <sup>Me</sup> C (4b)                                                                                                                                                            | 24 |
| Figure SII.21 HPLC profile of pure cENA- <sup>Me</sup> C (4c)                                                                                                                                                                   | 25 |
| Figure SII.22 HPLC profile of mixtures of 7'R-Me-cLNA-T (5a), 7'S-Me-cLNA-T (5b) and cENA-T (5c)                                                                                                                                | 26 |
| Figure SII.23 HPLC profile of pure 7'R-Me-cLNA-T (5a)                                                                                                                                                                           | 27 |
| Figure SII.24 HPLC profile of pure 7'S-Me-cLNA-T (5b)                                                                                                                                                                           | 28 |
| Figure SII.25 HPLC profile of pure cENA-T (5c)                                                                                                                                                                                  | 29 |
| Figure SII.26 MALDI-TOF spectrum of AON1                                                                                                                                                                                        | 30 |
| Figure SII.27 MALDI-TOF spectrum of AON2                                                                                                                                                                                        | 31 |
| Figure SII.28 MALDI-TOF spectrum of AON3                                                                                                                                                                                        | 32 |
| Figure SII.29 MALDI-TOF spectrum of AON4                                                                                                                                                                                        | 33 |
| Figure SII.30 MALDI-TOF spectrum of AON5                                                                                                                                                                                        | 34 |

|                                                                                                                                                                                                                                                                                                                                                                                                                                                                                                                                                                                                                                                                                                                                                                                                                                                                                                                                                                                                                                                                                                                                                                                                                  |    |
|------------------------------------------------------------------------------------------------------------------------------------------------------------------------------------------------------------------------------------------------------------------------------------------------------------------------------------------------------------------------------------------------------------------------------------------------------------------------------------------------------------------------------------------------------------------------------------------------------------------------------------------------------------------------------------------------------------------------------------------------------------------------------------------------------------------------------------------------------------------------------------------------------------------------------------------------------------------------------------------------------------------------------------------------------------------------------------------------------------------------------------------------------------------------------------------------------------------|----|
| Figure SII.31 MALDI-TOF spectrum of AON6                                                                                                                                                                                                                                                                                                                                                                                                                                                                                                                                                                                                                                                                                                                                                                                                                                                                                                                                                                                                                                                                                                                                                                         | 35 |
| Figure SII.32 MALDI-TOF spectrum of AON7                                                                                                                                                                                                                                                                                                                                                                                                                                                                                                                                                                                                                                                                                                                                                                                                                                                                                                                                                                                                                                                                                                                                                                         | 36 |
| Figure SII.33 MALDI-TOF spectrum of AON8                                                                                                                                                                                                                                                                                                                                                                                                                                                                                                                                                                                                                                                                                                                                                                                                                                                                                                                                                                                                                                                                                                                                                                         | 37 |
| Figure SII.34 MALDI-TOF spectrum of AON9                                                                                                                                                                                                                                                                                                                                                                                                                                                                                                                                                                                                                                                                                                                                                                                                                                                                                                                                                                                                                                                                                                                                                                         | 38 |
| Figure SII.35 MALDI-TOF spectrum of AON10                                                                                                                                                                                                                                                                                                                                                                                                                                                                                                                                                                                                                                                                                                                                                                                                                                                                                                                                                                                                                                                                                                                                                                        | 39 |
| Figure SII.36 MALDI-TOF spectrum of AON11                                                                                                                                                                                                                                                                                                                                                                                                                                                                                                                                                                                                                                                                                                                                                                                                                                                                                                                                                                                                                                                                                                                                                                        | 40 |
| Figure SII.37 MALDI-TOF spectrum of AON12                                                                                                                                                                                                                                                                                                                                                                                                                                                                                                                                                                                                                                                                                                                                                                                                                                                                                                                                                                                                                                                                                                                                                                        | 41 |
| Figure SII.38 MALDI-TOF spectrum of AON13                                                                                                                                                                                                                                                                                                                                                                                                                                                                                                                                                                                                                                                                                                                                                                                                                                                                                                                                                                                                                                                                                                                                                                        | 42 |
| Figure SII.39 MALDI-TOF spectrum of AON14                                                                                                                                                                                                                                                                                                                                                                                                                                                                                                                                                                                                                                                                                                                                                                                                                                                                                                                                                                                                                                                                                                                                                                        | 43 |
| Figure SII.40 MALDI-TOF spectrum of AON15                                                                                                                                                                                                                                                                                                                                                                                                                                                                                                                                                                                                                                                                                                                                                                                                                                                                                                                                                                                                                                                                                                                                                                        | 44 |
| Figure SII.41 MALDI-TOF spectrum of AON16                                                                                                                                                                                                                                                                                                                                                                                                                                                                                                                                                                                                                                                                                                                                                                                                                                                                                                                                                                                                                                                                                                                                                                        | 45 |
| Figure SII.42 MALDI-TOF spectrum of AON17                                                                                                                                                                                                                                                                                                                                                                                                                                                                                                                                                                                                                                                                                                                                                                                                                                                                                                                                                                                                                                                                                                                                                                        | 46 |
| Figure SII.43 MALDI-TOF spectrum of AON18                                                                                                                                                                                                                                                                                                                                                                                                                                                                                                                                                                                                                                                                                                                                                                                                                                                                                                                                                                                                                                                                                                                                                                        | 47 |
| Figure SII.44 MALDI-TOF spectrum of AON19                                                                                                                                                                                                                                                                                                                                                                                                                                                                                                                                                                                                                                                                                                                                                                                                                                                                                                                                                                                                                                                                                                                                                                        | 48 |
| Figure SII.45 MALDI-TOF spectrum of AON20                                                                                                                                                                                                                                                                                                                                                                                                                                                                                                                                                                                                                                                                                                                                                                                                                                                                                                                                                                                                                                                                                                                                                                        | 49 |
| Figure SII.46 MALDI-TOF spectrum of AON21                                                                                                                                                                                                                                                                                                                                                                                                                                                                                                                                                                                                                                                                                                                                                                                                                                                                                                                                                                                                                                                                                                                                                                        | 50 |
| Figure SII.47 MALDI-TOF spectrum of AON22                                                                                                                                                                                                                                                                                                                                                                                                                                                                                                                                                                                                                                                                                                                                                                                                                                                                                                                                                                                                                                                                                                                                                                        | 51 |
| Figure SII.48 MALDI-TOF spectrum of AON23                                                                                                                                                                                                                                                                                                                                                                                                                                                                                                                                                                                                                                                                                                                                                                                                                                                                                                                                                                                                                                                                                                                                                                        | 52 |
| Figure SII.49 MALDI-TOF spectrum of AON24                                                                                                                                                                                                                                                                                                                                                                                                                                                                                                                                                                                                                                                                                                                                                                                                                                                                                                                                                                                                                                                                                                                                                                        | 53 |
| Figure SII.50 MALDI-TOF spectrum of AON28                                                                                                                                                                                                                                                                                                                                                                                                                                                                                                                                                                                                                                                                                                                                                                                                                                                                                                                                                                                                                                                                                                                                                                        | 54 |
| Figure SII.51 MALDI-TOF spectrum of AON29                                                                                                                                                                                                                                                                                                                                                                                                                                                                                                                                                                                                                                                                                                                                                                                                                                                                                                                                                                                                                                                                                                                                                                        | 55 |
| Figure SII.52 MALDI-TOF spectrum of AON30                                                                                                                                                                                                                                                                                                                                                                                                                                                                                                                                                                                                                                                                                                                                                                                                                                                                                                                                                                                                                                                                                                                                                                        | 56 |
| Figure SII.53 MALDI-TOF spectrum of AON31                                                                                                                                                                                                                                                                                                                                                                                                                                                                                                                                                                                                                                                                                                                                                                                                                                                                                                                                                                                                                                                                                                                                                                        | 57 |
| Figure SII.54 MALDI-TOF spectrum of AON32                                                                                                                                                                                                                                                                                                                                                                                                                                                                                                                                                                                                                                                                                                                                                                                                                                                                                                                                                                                                                                                                                                                                                                        | 58 |
| Figure SII.55 MALDI-TOF spectrum of AON33                                                                                                                                                                                                                                                                                                                                                                                                                                                                                                                                                                                                                                                                                                                                                                                                                                                                                                                                                                                                                                                                                                                                                                        | 59 |
| Figure SII.56 MALDI-TOF spectrum of AON34                                                                                                                                                                                                                                                                                                                                                                                                                                                                                                                                                                                                                                                                                                                                                                                                                                                                                                                                                                                                                                                                                                                                                                        | 60 |
| Figure SII.57 MALDI-TOF spectrum of AON35                                                                                                                                                                                                                                                                                                                                                                                                                                                                                                                                                                                                                                                                                                                                                                                                                                                                                                                                                                                                                                                                                                                                                                        | 61 |
| Figure SII.58 MALDI-TOF spectrum of AON36                                                                                                                                                                                                                                                                                                                                                                                                                                                                                                                                                                                                                                                                                                                                                                                                                                                                                                                                                                                                                                                                                                                                                                        | 62 |
| Figure SII.59 MALDI-TOF spectrum of AON25                                                                                                                                                                                                                                                                                                                                                                                                                                                                                                                                                                                                                                                                                                                                                                                                                                                                                                                                                                                                                                                                                                                                                                        | 63 |
| Figure SII.60 MALDI-TOF spectrum of AON26                                                                                                                                                                                                                                                                                                                                                                                                                                                                                                                                                                                                                                                                                                                                                                                                                                                                                                                                                                                                                                                                                                                                                                        | 64 |
| Figure SII.61 MALDI-TOF spectrum of AON27                                                                                                                                                                                                                                                                                                                                                                                                                                                                                                                                                                                                                                                                                                                                                                                                                                                                                                                                                                                                                                                                                                                                                                        | 65 |
| Table SII.1. Extend of RNase H promoted cleavage at 60 minutes of the AON/RNA hybrid duplexes shown as products proportion (%).                                                                                                                                                                                                                                                                                                                                                                                                                                                                                                                                                                                                                                                                                                                                                                                                                                                                                                                                                                                                                                                                                  | 66 |
| Table SII.2. Average cleavage rate ( $\mu\text{M min}^{-1} \text{U}^{-1}$ ) during first 60 minutes normalized to 1 unit (U) of enzyme of RNase H promoted cleavage of the AON/RNA                                                                                                                                                                                                                                                                                                                                                                                                                                                                                                                                                                                                                                                                                                                                                                                                                                                                                                                                                                                                                               | 69 |
| Table SII.4. Cleavage products composition (%) grouped by the sequence context with purine (Pu) or pyrimidine (Py) nucleotide on the 3'-end as 5'-ApPu-3' (cleavage sites 5'-A <sup>1</sup> pA <sup>2</sup> -3' and 5'-A <sup>13</sup> pG <sup>14</sup> -3'), 5'-ApPy-3' (5'-A <sup>2</sup> pU <sup>3</sup> -3', 5'-A <sup>6</sup> pU <sup>7</sup> -3' and 5'-A <sup>11</sup> pC <sup>12</sup> -3'), 5'-GpPu-3' (5'-G <sup>19</sup> pA <sup>20</sup> -3', 5'-G <sup>14</sup> pG <sup>15</sup> -3', 5'-G <sup>17</sup> pG <sup>18</sup> -3', and 5'-G <sup>18</sup> pG <sup>19</sup> -3'), 5'-GpPy-3' (5'-G <sup>8</sup> pU <sup>9</sup> -3', 5'-G <sup>4</sup> pC <sup>5</sup> -3' and 5'-G <sup>15</sup> pC <sup>16</sup> -3'), 5'-UpPu-3' (5'-U <sup>3</sup> pG <sup>4</sup> -3' and 5'-U <sup>7</sup> pG <sup>8</sup> -3'), 5'-UpPy-3' (5'-U <sup>9</sup> pG <sup>10</sup> -3') and 5'-CpPu-3' (5'-C <sup>5</sup> pA <sup>6</sup> -3', 5'-C <sup>10</sup> pA <sup>11</sup> -3', 5'-C <sup>12</sup> pA <sup>13</sup> -3', and 5'-C <sup>16</sup> pG <sup>17</sup> -3') as well as grouped by nucleotide on the 5'-end. Individual cleavage site products are reported in details in Table SII.1 in SI Part II. | 74 |
| Figure SII.62. <i>E. coli</i> RNase H promoted cleavage of the native AON/RNA. <b>Inset A</b> shows product ratio (in %) at 60 minutes, <b>Inset B</b> is time dependence of the relative concentrations [S]/[S] <sub>0</sub> of initial 20mer AON/RNA duplexes and all cleavage products                                                                                                                                                                                                                                                                                                                                                                                                                                                                                                                                                                                                                                                                                                                                                                                                                                                                                                                        | 76 |
| Figure SII.63. <i>E. coli</i> RNase H promoted cleavage of AON1-6,25-27/RNA heteroduplexes containing modified nucleotides <b>A</b> = 7'R-Me-cLNA-A (AON1-3) or 7'S-Me-cLNA-A (AON4-6) or LNA-A (AON25-27) quantified as time dependence of the relative                                                                                                                                                                                                                                                                                                                                                                                                                                                                                                                                                                                                                                                                                                                                                                                                                                                                                                                                                         | 77 |

|                                                                                                                                                                                                                                                                                                                                                                                                          |    |
|----------------------------------------------------------------------------------------------------------------------------------------------------------------------------------------------------------------------------------------------------------------------------------------------------------------------------------------------------------------------------------------------------------|----|
| concentrations $[S]/[S]_0$ of initial 20mer AON/RNA duplexes and all cleavage products                                                                                                                                                                                                                                                                                                                   |    |
| Figure SII.64. <i>E. coli</i> RNase H promoted cleavage of AON7-12,28-30/RNA heteroduplexes containing modified nucleotides <b>G</b> = 7'R-Me-cLNA-G (AON7-9) or 7'S-Me-cLNA-G (AON10-12) or LNA-G (AON28-30) quantified as time dependence of the relative concentrations $[S]/[S]_0$ of initial 20mer AON/RNA duplexes and all cleavage                                                                | 78 |
| Figure SII.65. <i>E. coli</i> RNase H promoted cleavage of AON13-18,31-33/RNA heteroduplexes containing modified nucleotides <b>C</b> = 7'R-Me-cLNA- <sup>5-Me</sup> C (AON13-15) or 7'S-Me-cLNA- <sup>5-Me</sup> C (AON16-18) or LNA- <sup>5-Me</sup> C (AON31-33) quantified as time dependence of the relative concentrations $[S]/[S]_0$ of initial 20mer AON/RNA duplexes and all cleavage products | 79 |
| Figure SII.66. <i>E. coli</i> RNase H promoted cleavage of AON19-24,34-35/RNA heteroduplexes containing modified nucleotides <b>T</b> = 7'R-Me-cLNA-T (AON19-21) or 7'S-Me-cLNA-T (AON22-24) or LNA-T (AON34-35) quantified as time dependence of the relative concentrations $[S]/[S]_0$ of initial 20mer AON/RNA duplexes and all cleavage products                                                    | 80 |
| Figure SII.67. Relative concentrations of various products formed due to RNase H promoted degradation of RNA in native and AON1-36/RNA hybrid duplexes.                                                                                                                                                                                                                                                  | 81 |



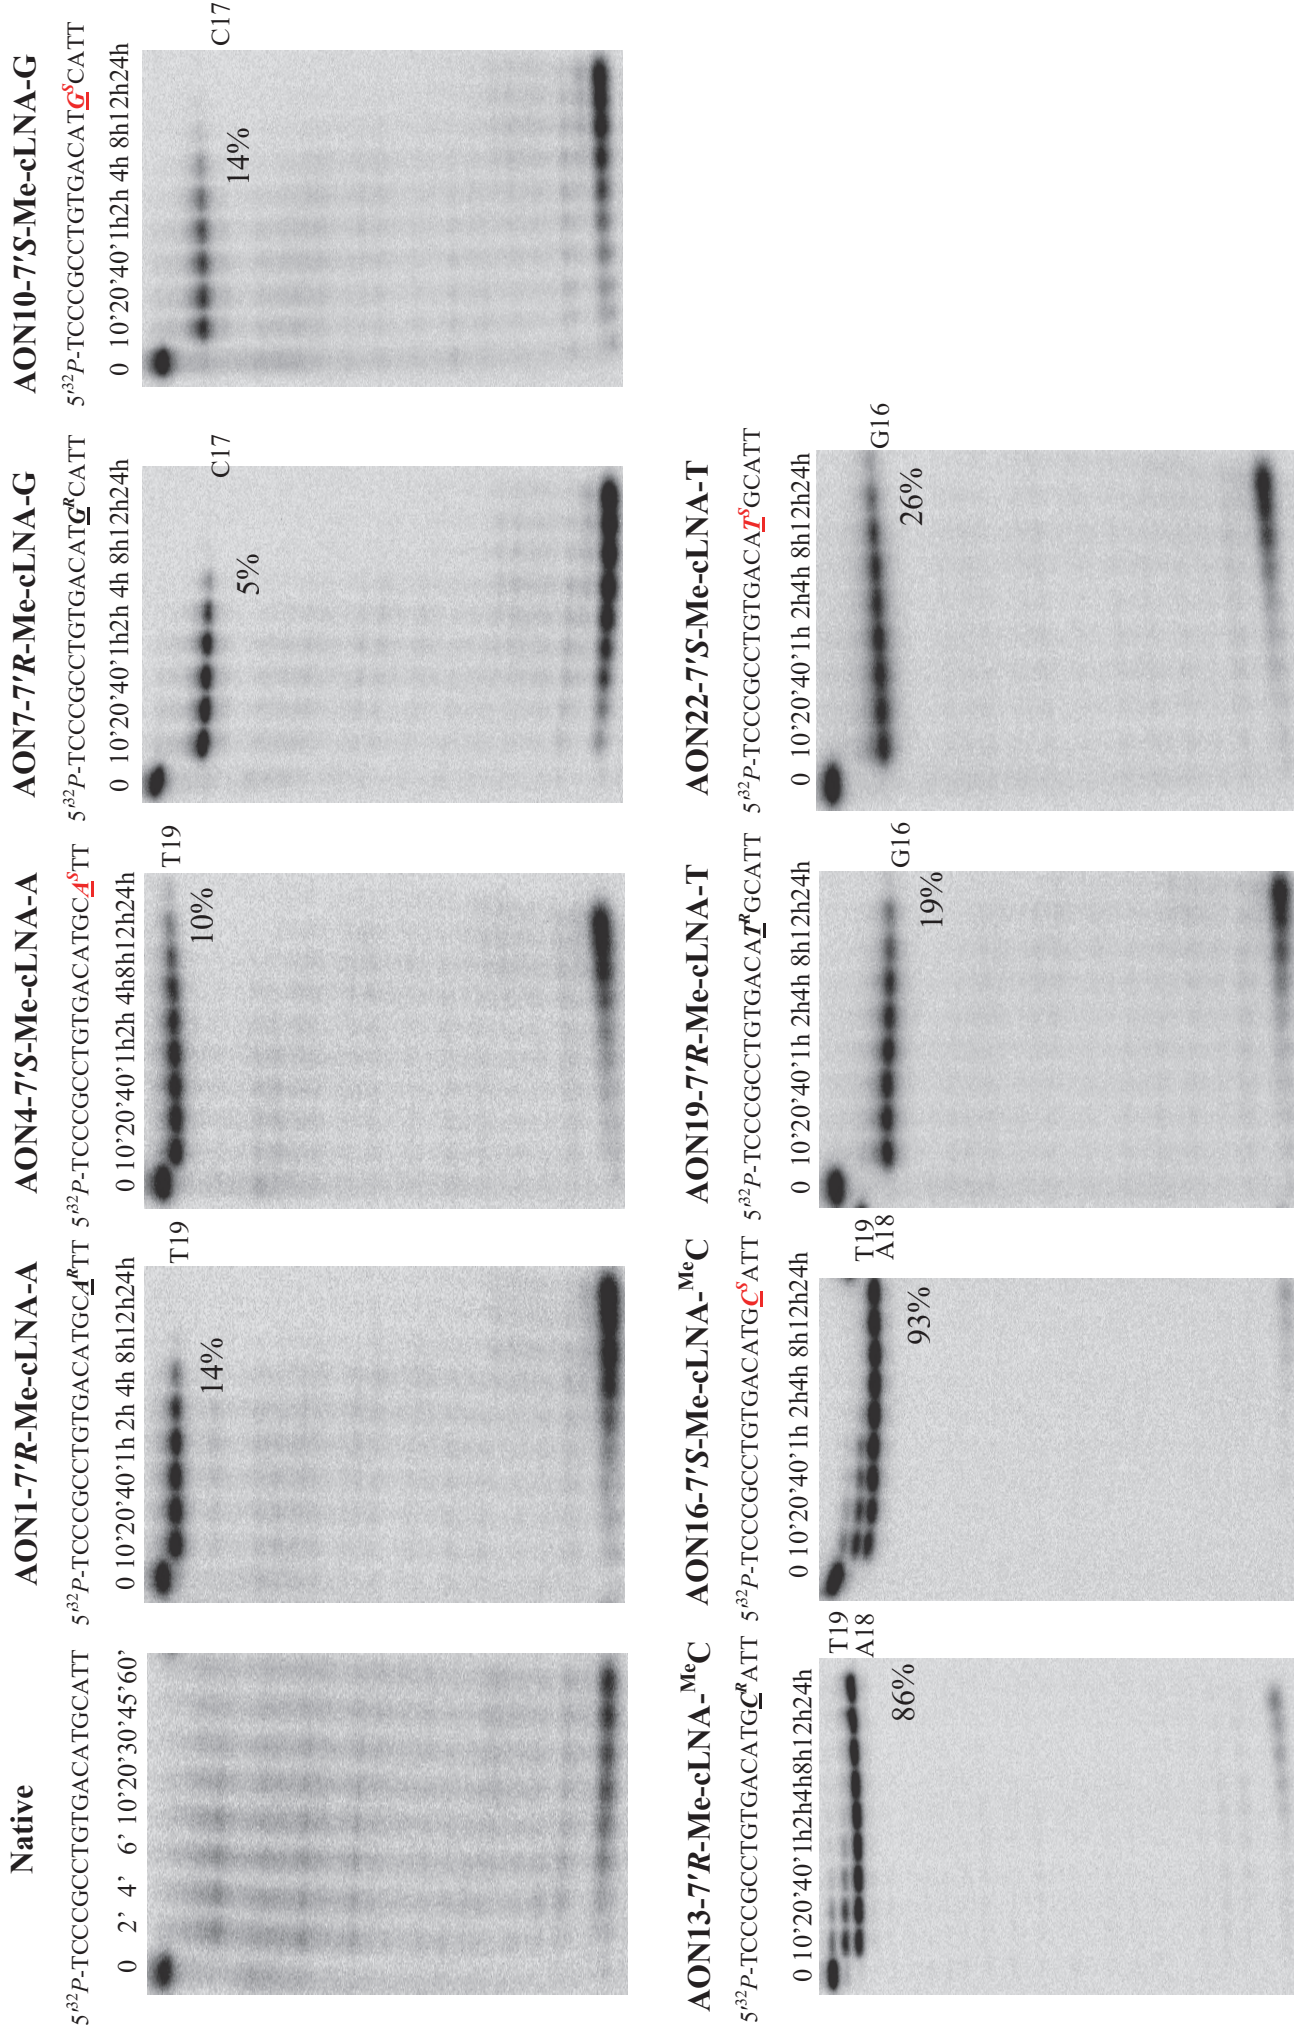

**Figure SII.1 (published as Figure 11 in Ref 22)** Autoradiograms of 20% denatured PAGE showing SVPDE degradation of 5'-end <sup>32</sup>P labeled native AON and modified AON1, 4, 7, 10, 13, 16, 19, 22. The AON% left after 24 hour incubation for each AON is shown below the corresponding band (native - 0%, AON1 - 14%, AON4 - 10%, AON7 - 5%, AON10 - 14%, AON13 - 86%, AON16 - 93%, AON19 - 19%, AON22 - 26%). Digestion conditions: AON 3 μM (5'-end <sup>32</sup>P labeled with specific activity 80 000 cpm) in 100 mM Tris-HCl (pH 8.0) and 15 mM MgCl<sub>2</sub>, 21 °C, total reaction volume 30 μL. SVPDF concentration (6.7 nM/μL).



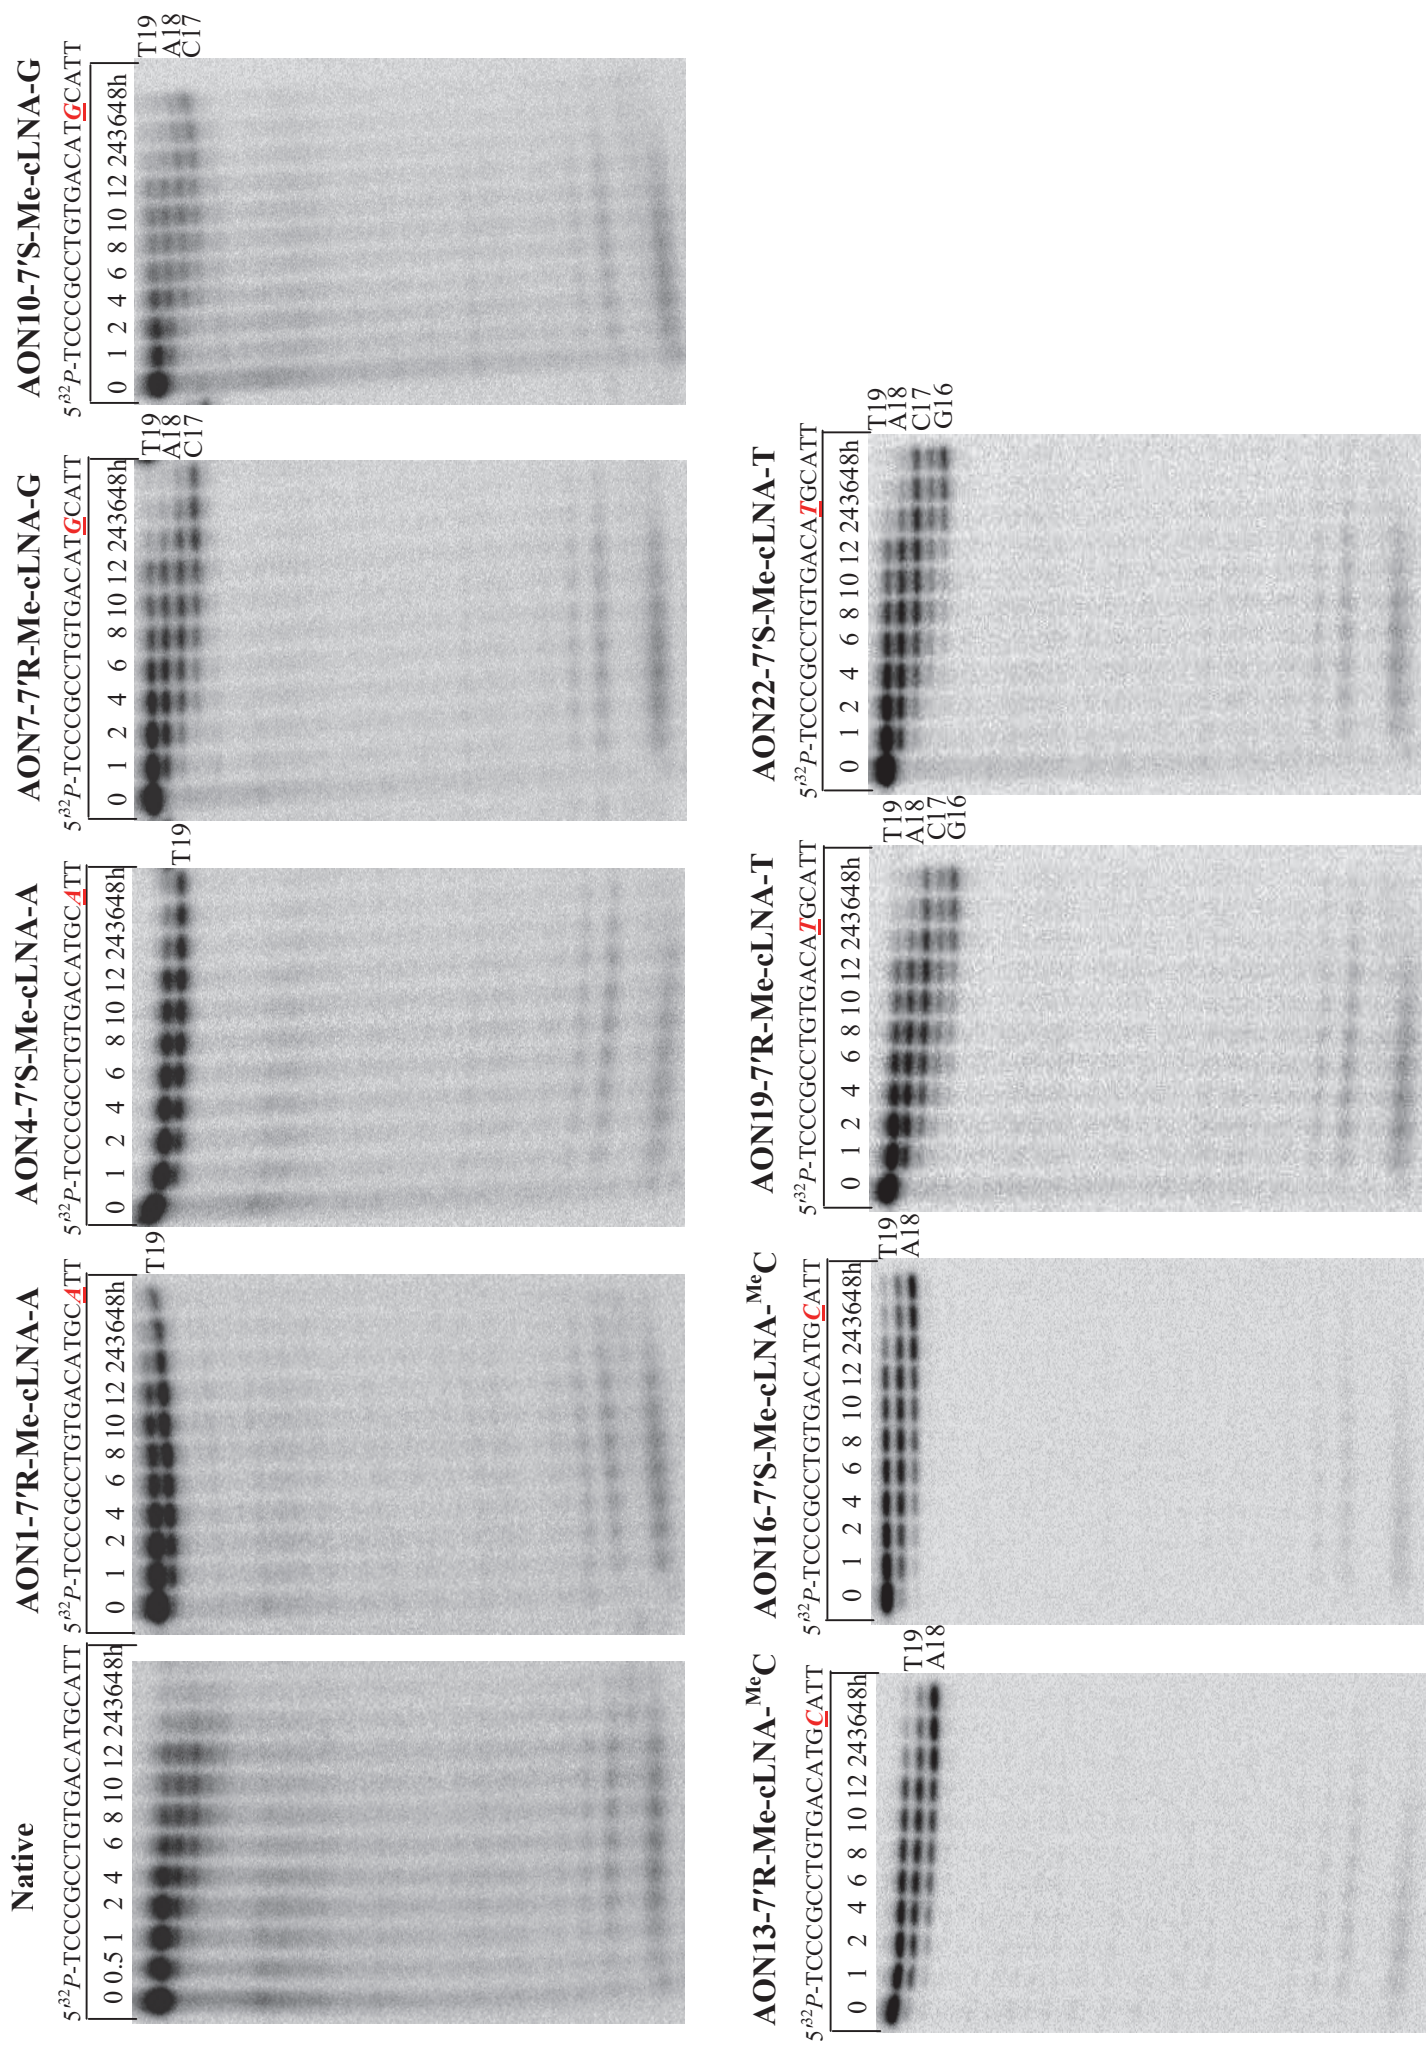

Figure SII.2 Autoradiograms of 20% denatured PAGE showing the stability of 5'-end  $^{32}\text{P}$  labeled native AON and modified AON1, 4, 7, 10, 13, 16, 19, 22 in human blood serum.





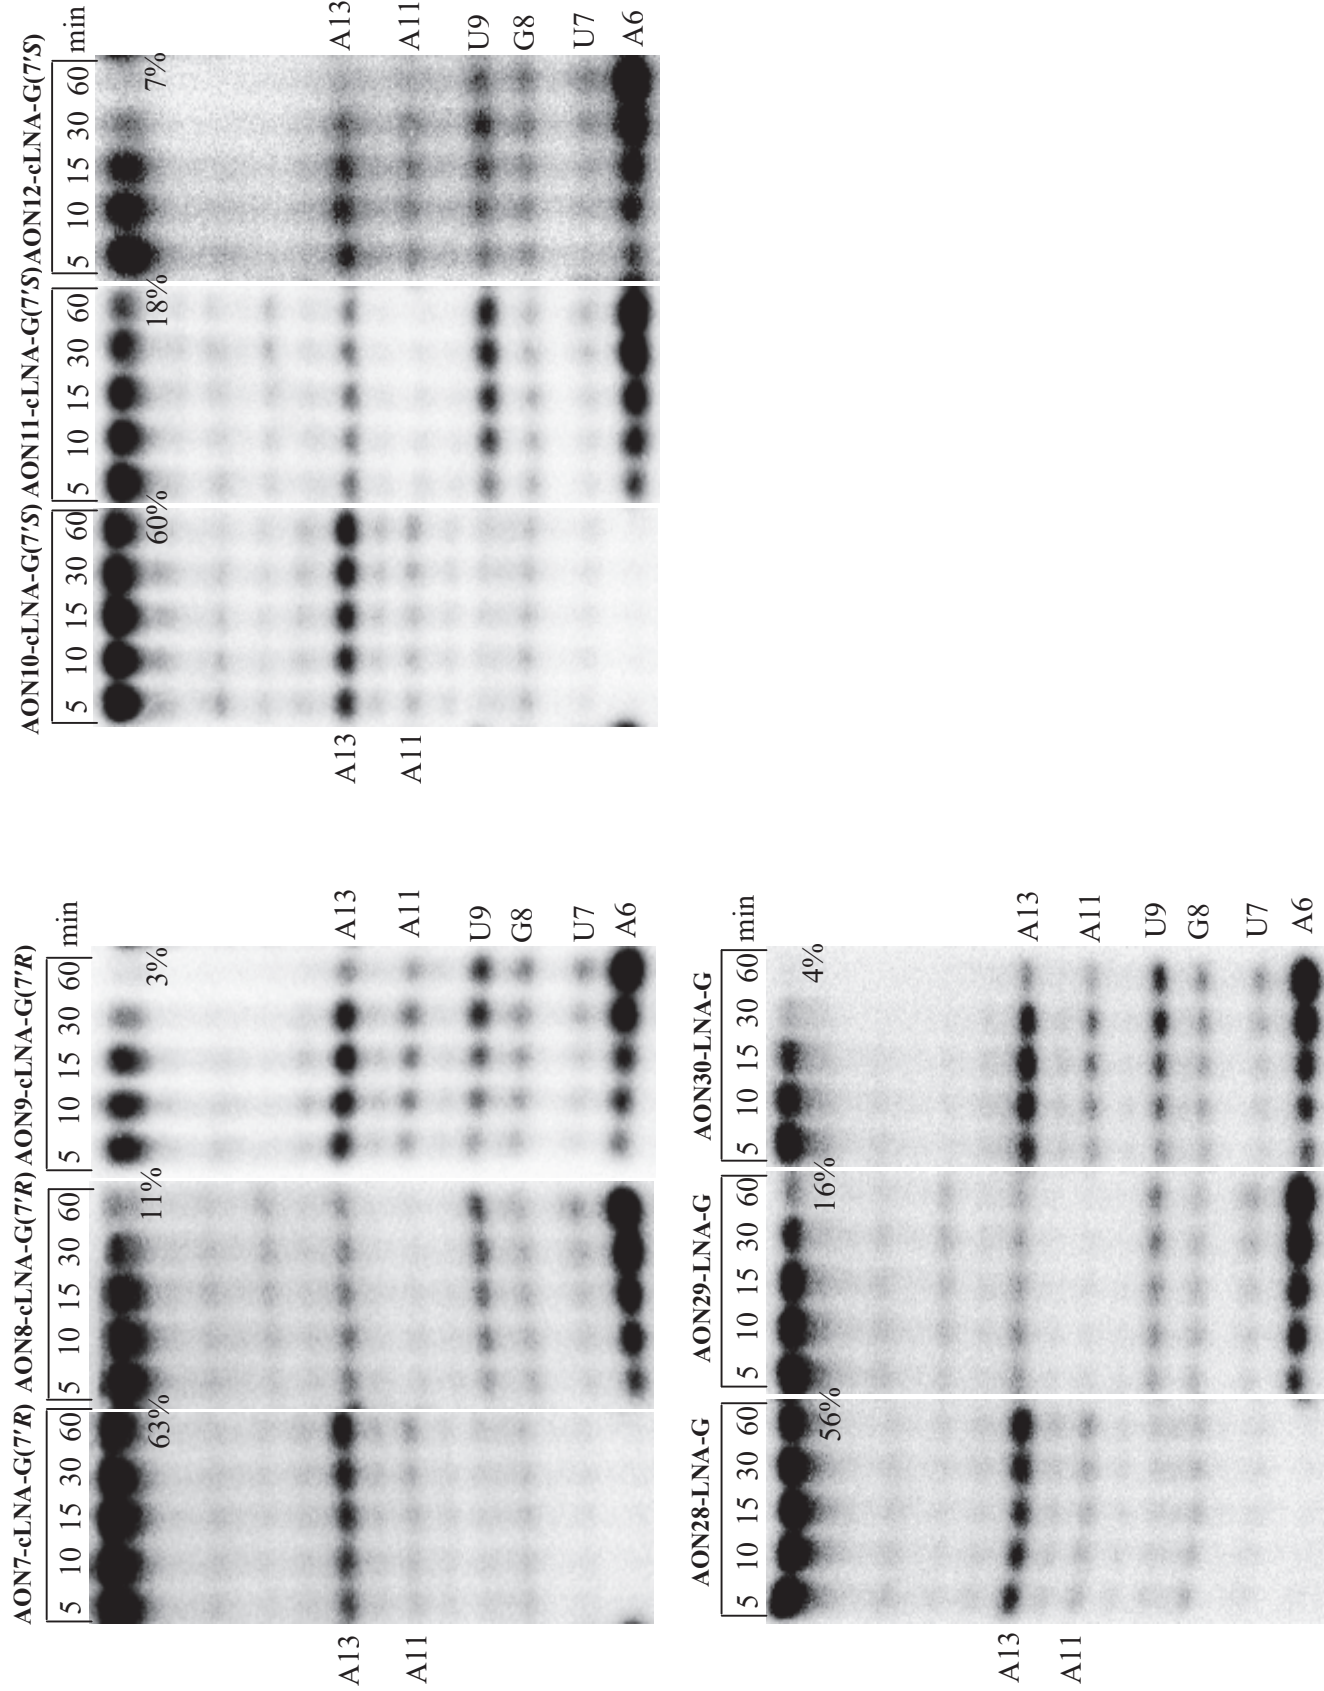

**Figure SII.4** Autoradiograms of 20% denaturing PAGE pictures, showing the cleavage kinetics of 5'-<sup>32</sup>P-labeled target RNA by *E. coli* RNase H1 in the LNA-G and cLNA-G modified AON/RNA hybrids. The intact RNA% left after 1 hour incubation for each AON/RNA is shown below the corresponding band. Conditions of cleavage reactions: RNA (0.1  $\mu$ M) and AONs (2  $\mu$ M) in buffer containing 20 mM Tris-HCl (pH 8.0), 20 mM KCl, 10 mM MgCl<sub>2</sub>, and 0.1 mM DTT at 21 °C, 0.08 U of RNase H1, total volume 30  $\mu$ L.



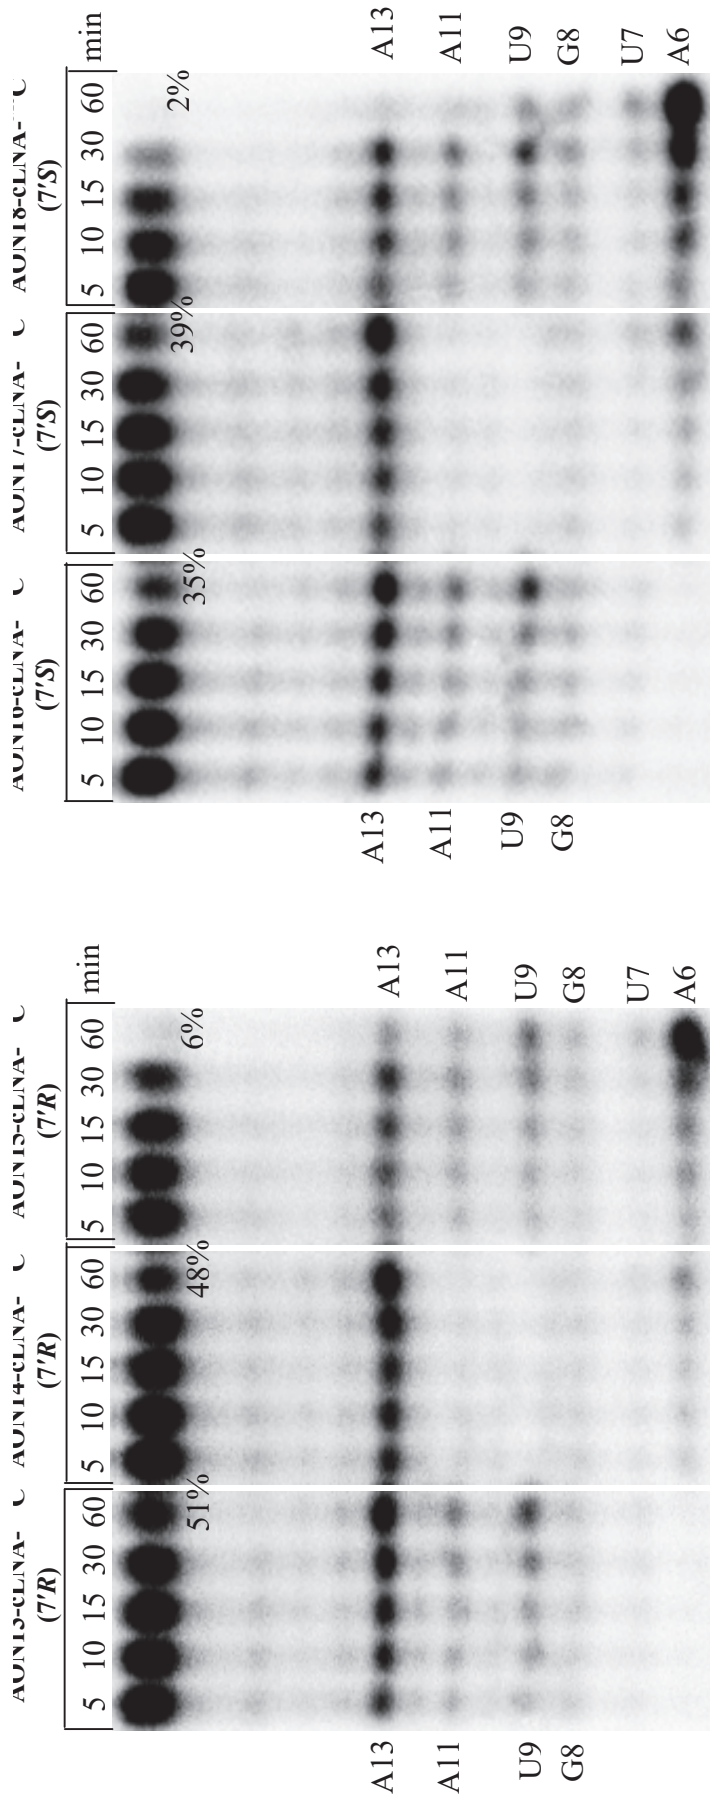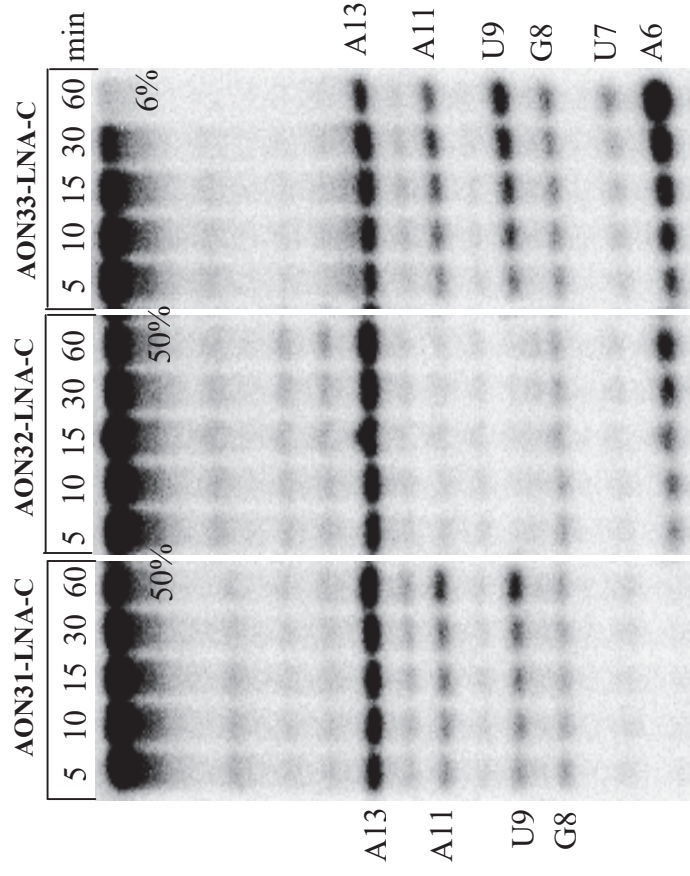

**Figure SII.5** Autoradiograms of 20% denaturing PAGE pictures, showing the cleavage kinetics of 5'-<sup>32</sup>P-labeled target RNA by *E. coli* RNase H1 in the LNA<sup>2</sup> C and cLNA-<sup>Mc</sup>C modified AON/RNA hybrids. The intact RNA% left after 1 hour incubation for each AON/RNA% is shown below the corresponding band. Conditions of cleavage reactions: RNA (0.1  $\mu$ M) and AONs (2  $\mu$ M) in buffer containing 20 mM Tris-HCl (pH 8.0), 20 mM KCl, 10 mM MgCl<sub>2</sub>, and 0.1 mM DTT at 21 °C. 0.08 U of RNase H1, total volume 30  $\mu$ L.

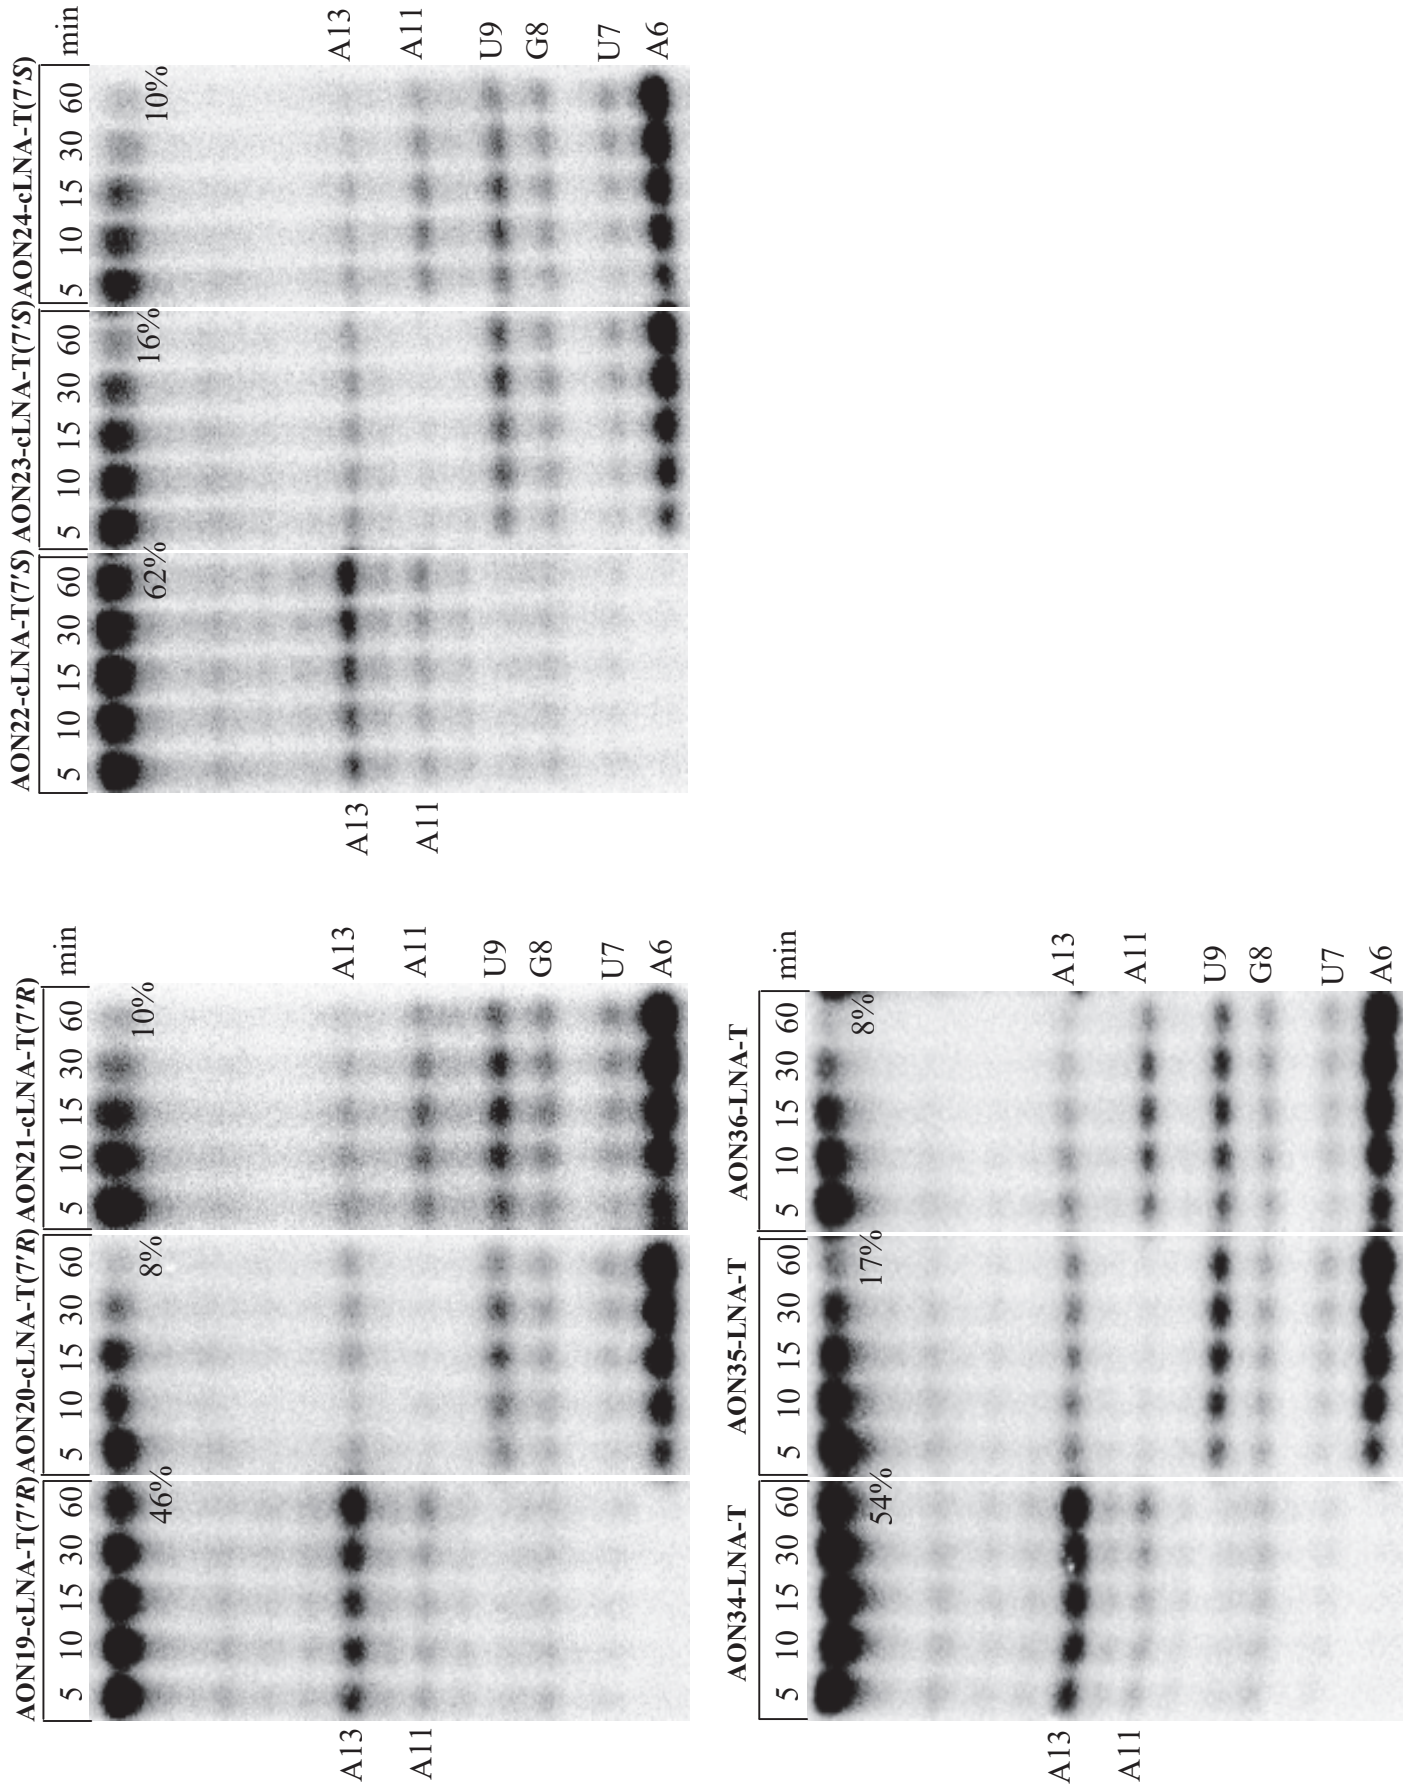

**Figure SII.6** Autoradiograms of 20% denaturing PAGE pictures, showing the cleavage kinetics of 5'-<sup>32</sup>P-labeled target RNA by *E. coli* RNase H1 in the LNA9T and cLNA-T modified AON/RNA hybrids. The intact RNA% left after 1 hour incubation for each AON/RNA is shown below the corresponding band. Conditions of cleavage reactions: RNA (0.1  $\mu$ M) and AONs (2  $\mu$ M) in buffer containing 20 mM Tris-HCl (pH 8.0), 20 mM KCl, 10 mM MgCl<sub>2</sub>, and 0.1 mM DTT at 21 °C, 0.08 U of RNase H1, total volume 30  $\mu$ L.

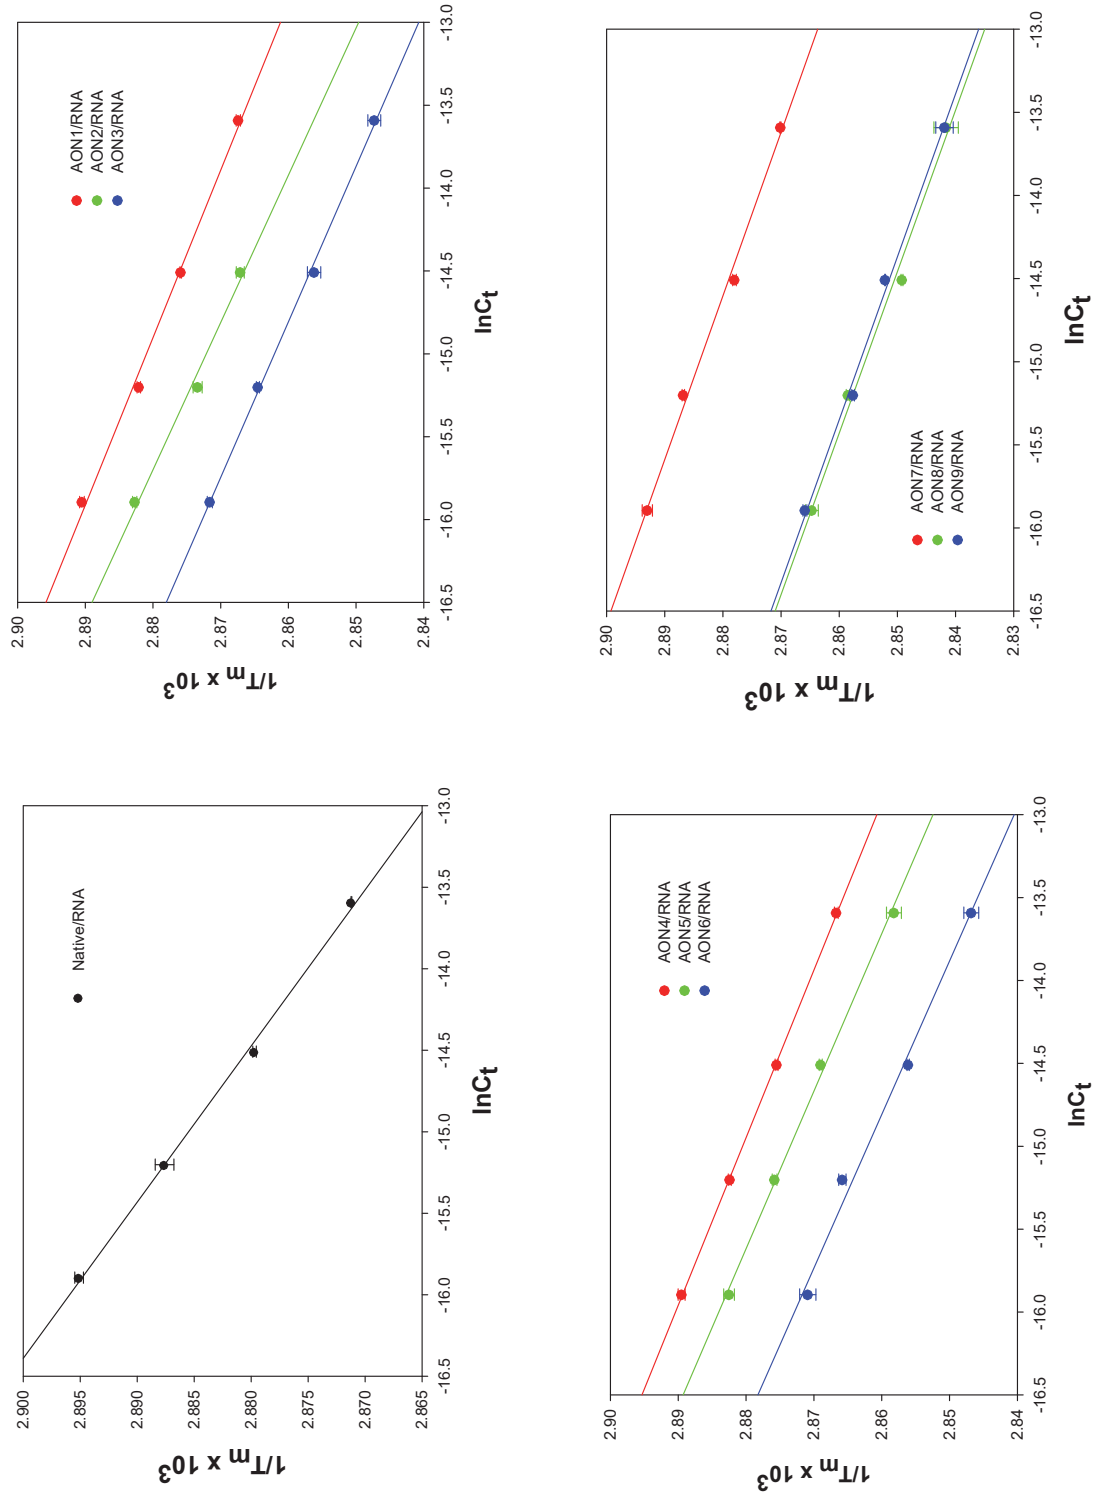

Figure SII.7 Plots of  $T_m^{-1}$  vs  $\ln(C_t/4)$  for native AON/1-9 RNA and AONs 1-9/1-9 RNA duplexes obtained from concentration-dependent  $T_m$  measurement.



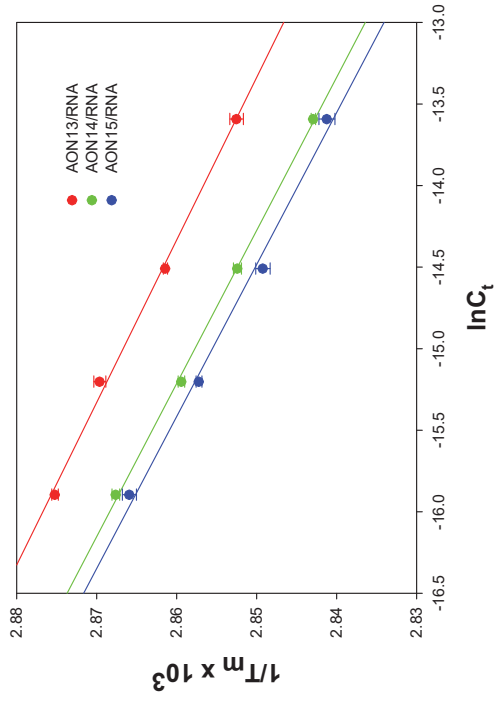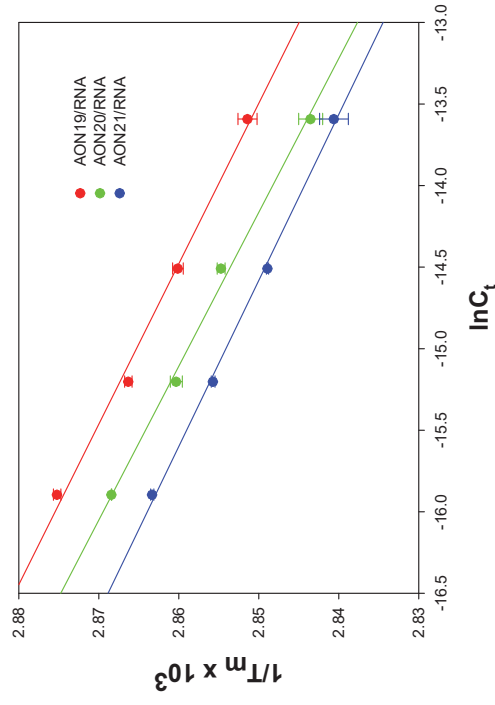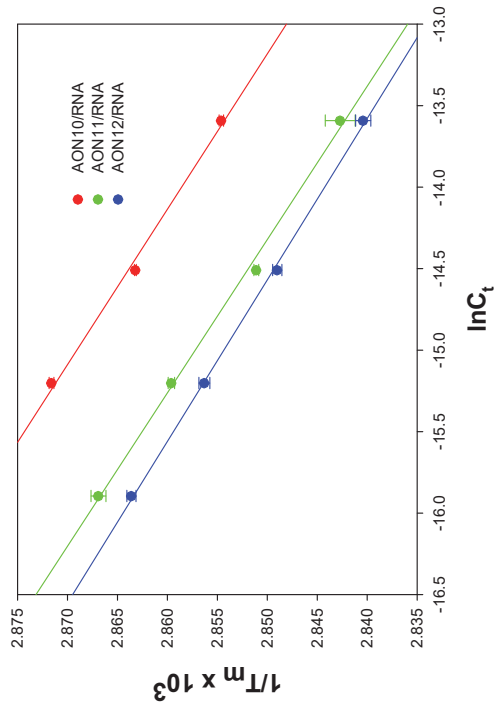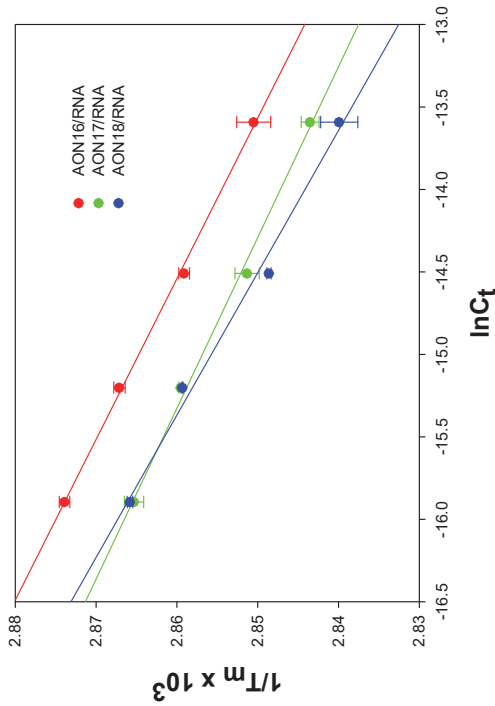

Figure SII.8 Plots of  $T_m^{-1}$  vs  $\ln(C_t/4)$  for AONs 10-21/RNA duplexes obtained from concentration-dependent  $T_m$  measurement.

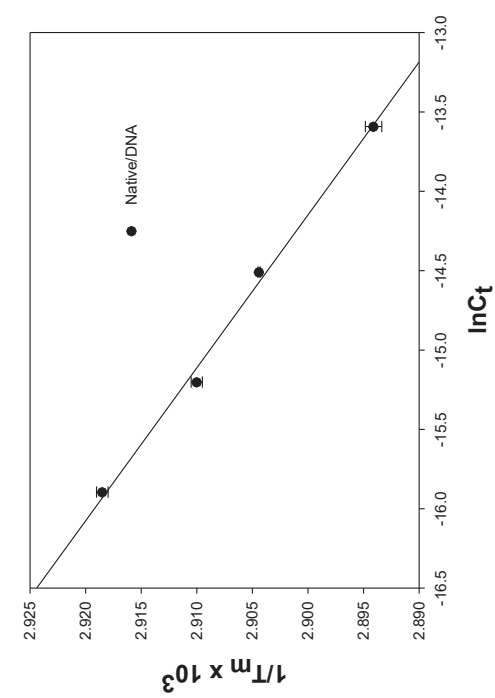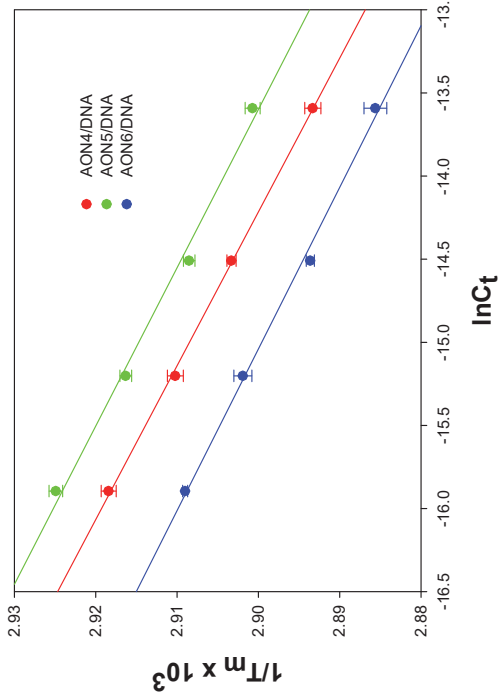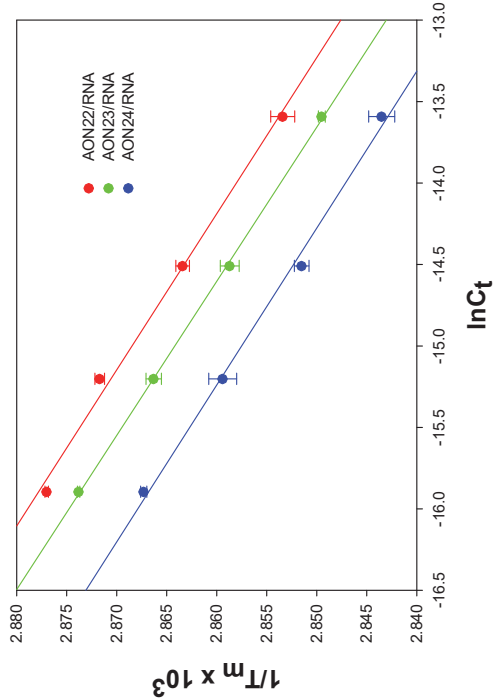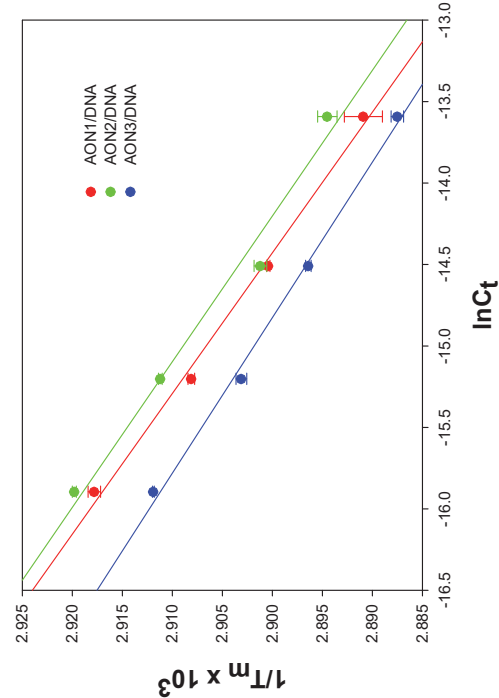

Figure SII.9 Plots of  $T_m^{-1}$  vs  $\ln(C_t/4)$  for AONs 22-24/RNA, native AON/DNA and AONs 1-6/DNA duplexes obtained from concentration-dependent  $T_m$  measurement.

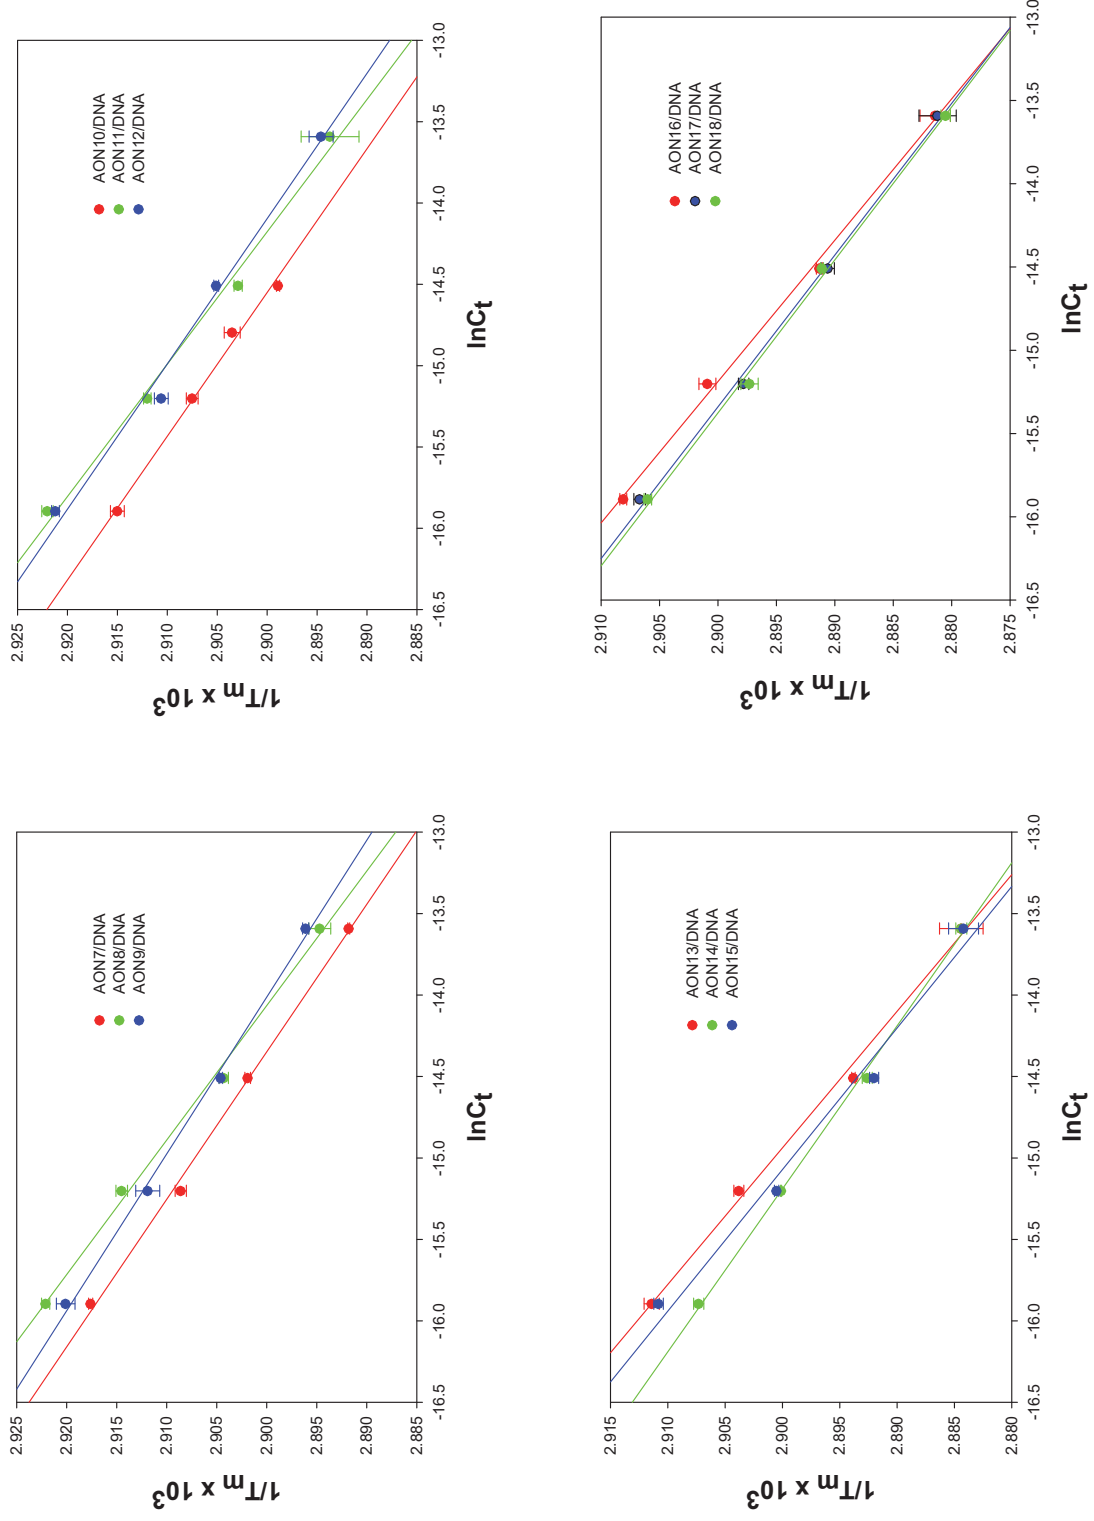

Figure SII.10 Plots of  $T_m^{-1}$  vs  $\ln(C_t/4)$  for AONs 7-18/DNA duplexes obtained from concentration-dependent  $T_m$  measurement.

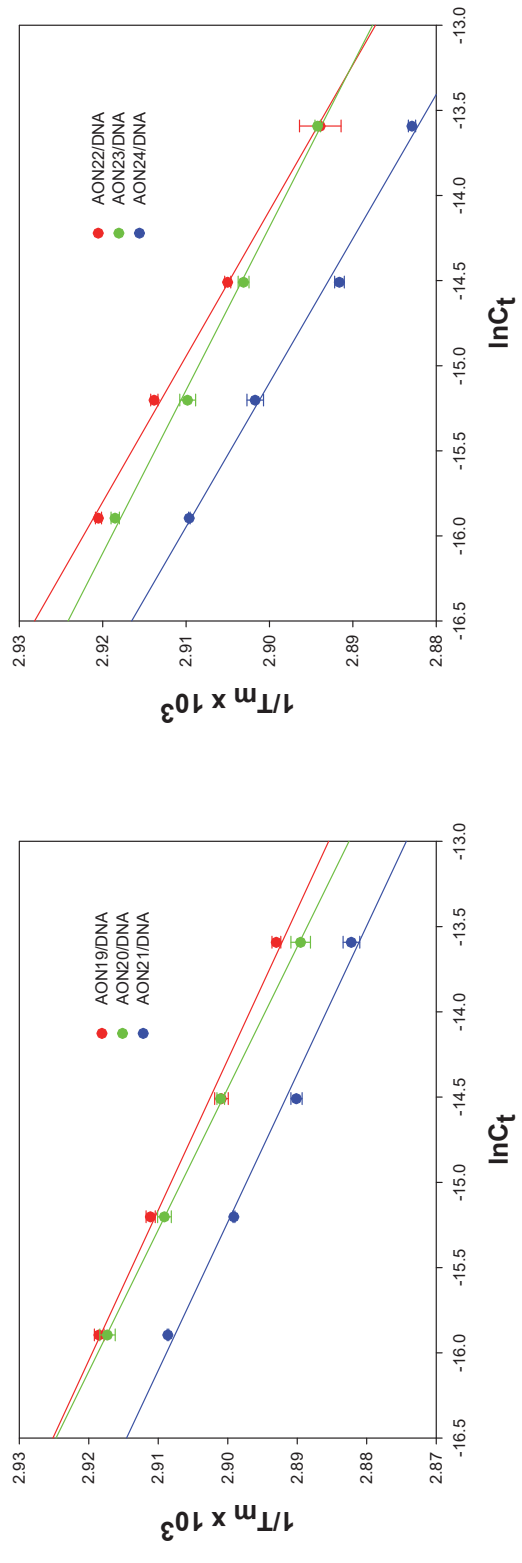

Figure SII.11 Plots of  $T_m^{-1}$  vs  $\ln(C_t/4)$  for AONs 19-24/DNA duplexes obtained from concentration-dependent  $T_m$  measurement.

Figure SII.12 HPLC profile of mixtures of 7'S-Me-cLNA-A (2b) and cENA-A (2c)

SAMPLE-CR222-111A-5 ANA

->

Column: ZORBAX SB C18 (250X4.6)mm, 5um  
 Injection date : Tue, 1. Mar. 2011 Location : Vial 51  
 Sample Name : CR222-111A-5 ANA Inj. No. : 1  
 Acq Operator : RAMESH Inj. Vol-10 µl  
 Analysis Method : C:\CHEM32\1\METHODS\CR222 ANA2.M  
 Last Changed : Tue, 1. Mar. 2011,  
 Acq. Method : C:\Chem32\1\DATA\MAR-11\010311A1 2011-03-01 18-21-24\  
 CR222 ANA2.M

Adenine Minor +Endo

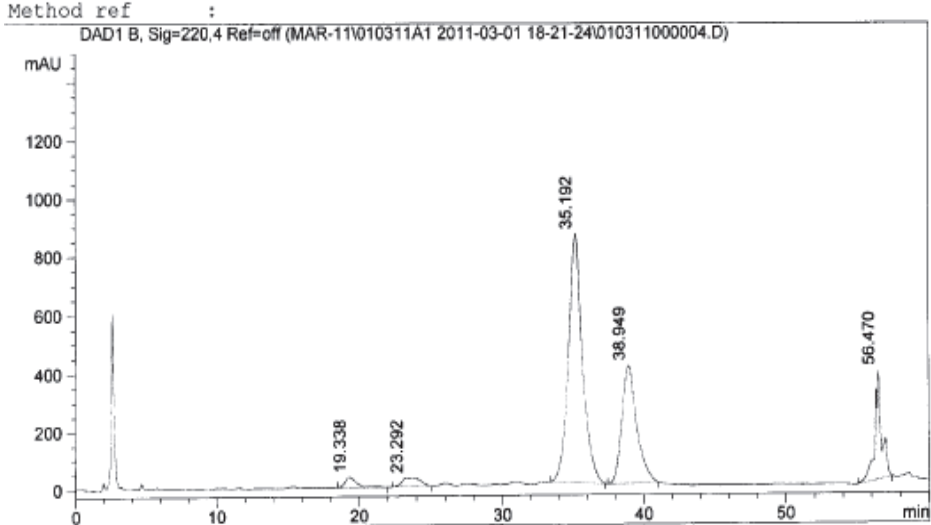

DAD1 B, Sig=220,4 Ref=off

| Peak # | RT (Min) | Width (Min) | Area    | Area % |
|--------|----------|-------------|---------|--------|
| 1      | 19.338   | 1.037       | 2.139e3 | 2.018  |
| 2      | 23.292   | 1.414       | 2.559e3 | 2.415  |
| 3      | 35.192   | 1.153       | 5.914e4 | 55.820 |
| 4      | 38.949   | 1.221       | 2.978e4 | 28.107 |
| 5      | 56.470   | 0.547       | 1.233e4 | 11.639 |

MPA- 10 mM Ammonium Acetate  
 MPB- AcN: MeOH (50:50)  
 Flow - 1.0 ml/min  
 Gradient -

| Time | % B |
|------|-----|
| 0.01 | 70  |
| 50   | 70  |
| 51   | 100 |
| 55   | 100 |
| 56   | 70  |
| 60   | 70  |

\*\*\* End of Report\*\*\*

**Figure SII.13 HPLC profile of pure 7'S-Me-cLNA-A (2b).**

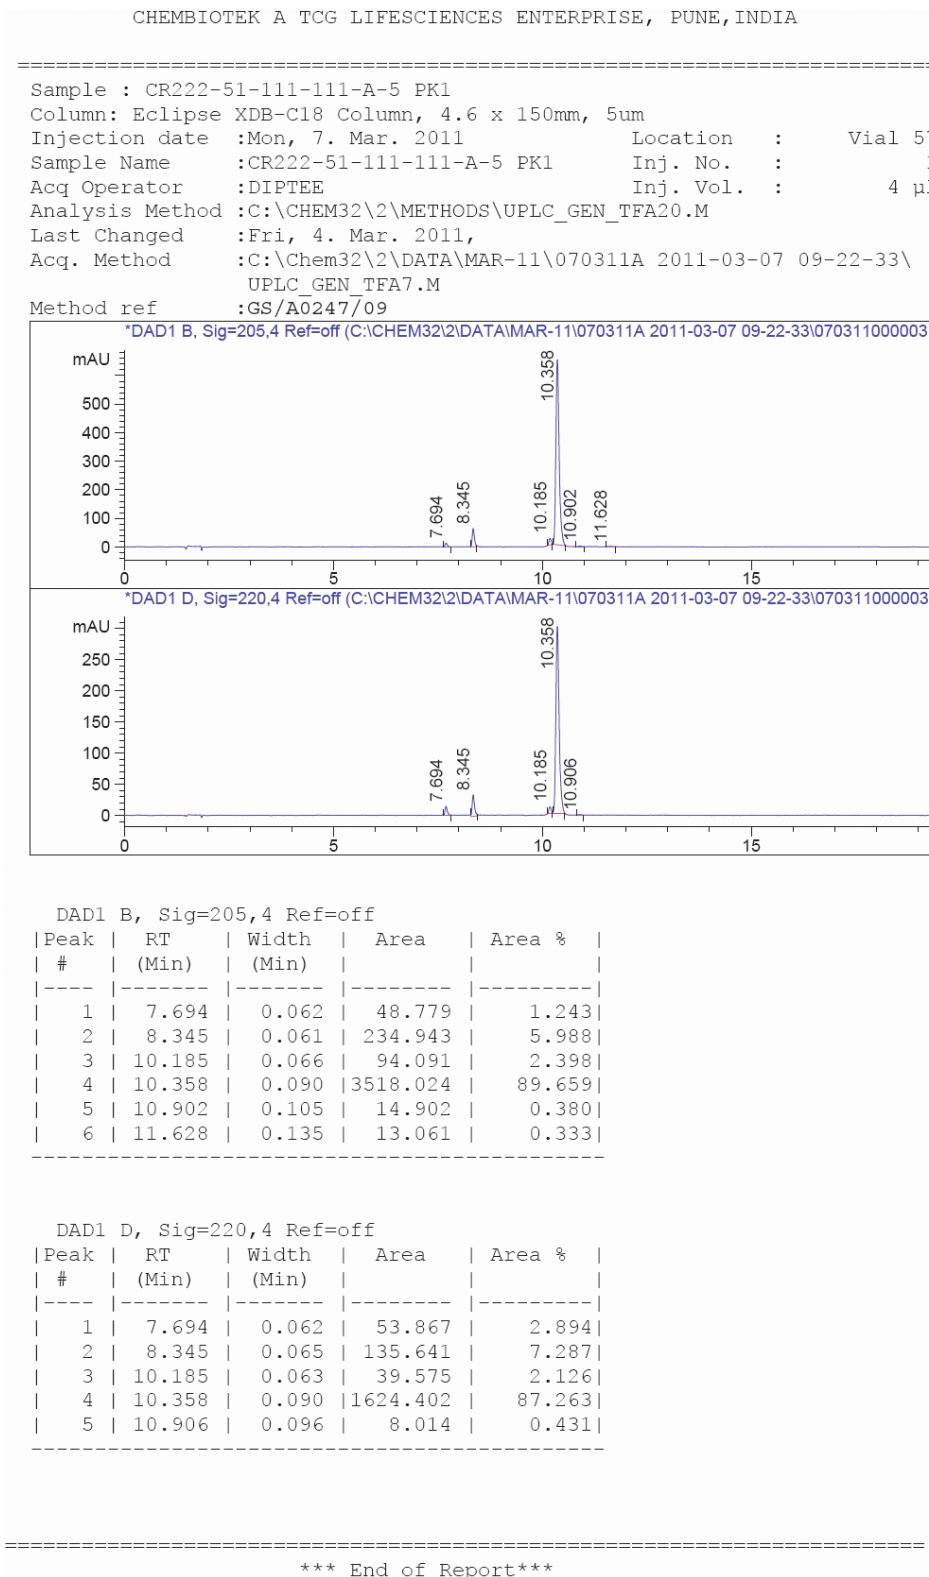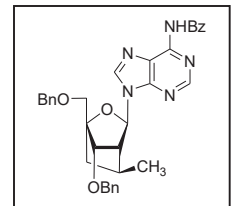

**Figure SII.14 HPLC profile of pure cENA-A (2c).**

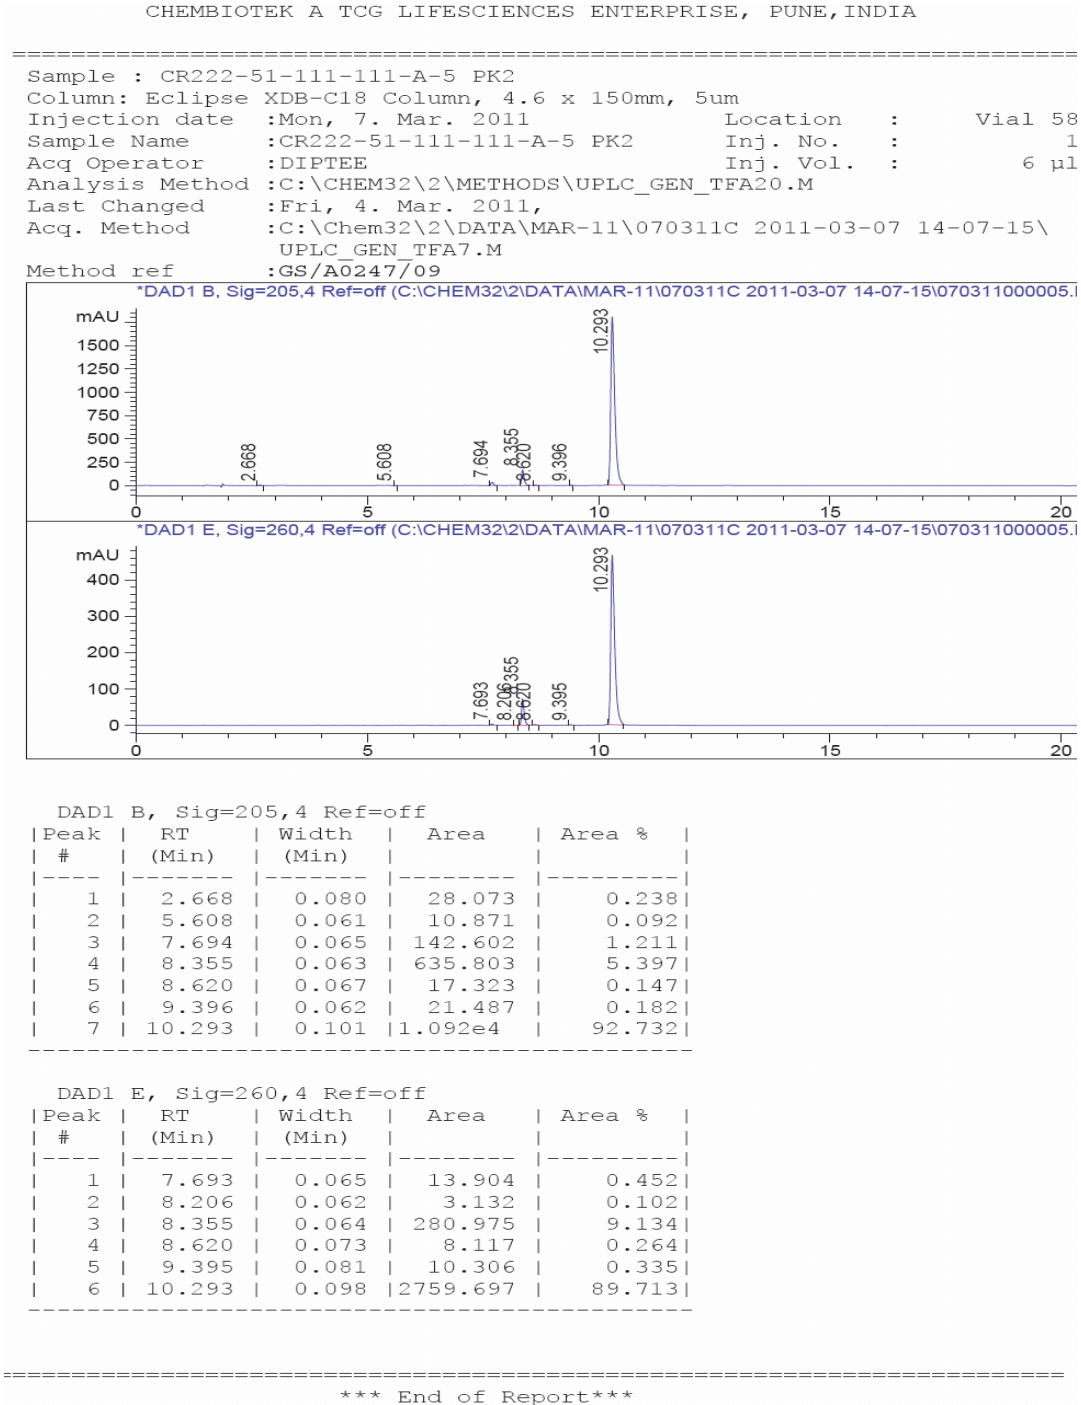



**Figure SII.15 HPLC profile of mixtures of 7'S-Me-cLNA-G (3b) and cENA-G (3c)**

CR222-113-27-27-B-1  
 Column: ZORBAX SB C18 (250X21.2)mm, 7µm  
 Injection date : Fri, 28. Jan. 2011 Location : Vial 51  
 Sample Name : CR222-113-27-27-B-1 Inj. No. : 0  
 Acq Operator : RAMESH Inj. Vol. : 500 µl  
 Analysis Method : C:\CHEM32\1\METHODS\POLAR ANA 2.M  
 Last Changed : Thu, 27. Jan. 2011,  
 Acq. Method : C:\CHEM32\1\METHODS\OXAMYL TECH\_ISO\_85\_15 ANA1.M

Guanine Minor + Endo

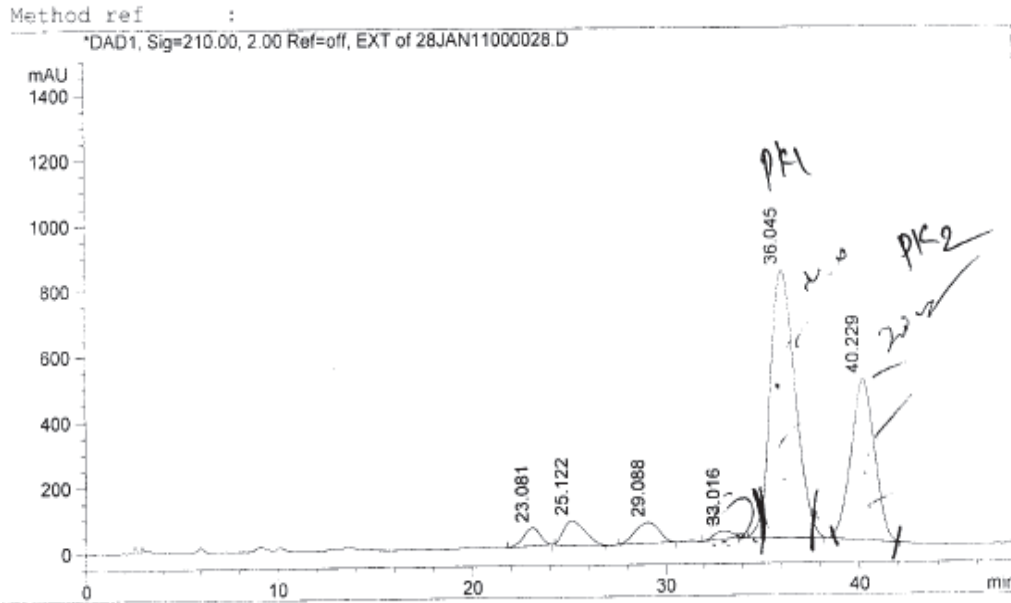

DAD1, Sig=210.00, 2.00 Ref=off, EXT

| Peak # | RT (Min) | Width (Min) | Area     | Area % |
|--------|----------|-------------|----------|--------|
| 1      | 23.081   | 0.991       | 3.314e3  | 2.536  |
| 2      | 25.122   | 1.308       | 15.879e3 | 4.498  |
| 3      | 29.088   | 1.429       | 15.483e3 | 4.195  |
| 4      | 33.016   | 0.735       | 1.539e3  | 1.178  |
| 5      | 36.045   | 1.487       | 7.310e4  | 55.935 |
| 6      | 40.229   | 1.391       | 4.137e4  | 31.658 |

MPA - 10mm AA  
 MPB - ACN: MeOH (50:50)  
 Flow - 20.0 µl/min  
Gradient.  
 75% β Isocratic — 50 min

\*\*\* End of Report\*\*\*

**Figure SII.16 LC-MS profile of pure 7'S-Me-cLNA-G (3b).**

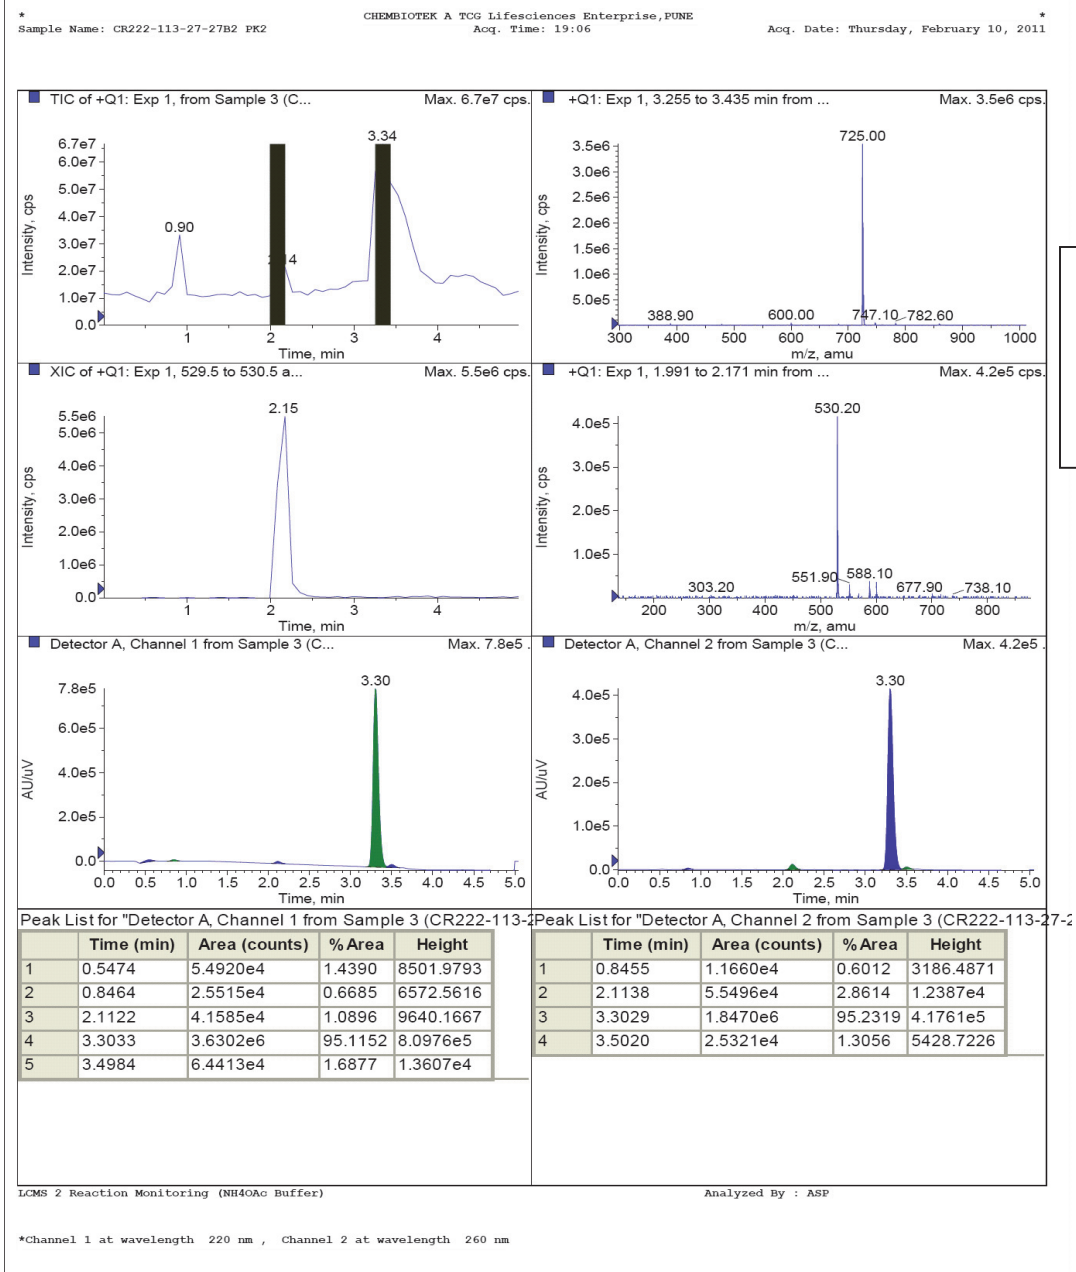

**Figure SII.17 LC-MS profile of pure cENA-G (3c).**

Sample Name: CR222-113-27-27B2 PK1

Acq. Time: 19:00

Acq. Date: Thursday, February 10, 2011

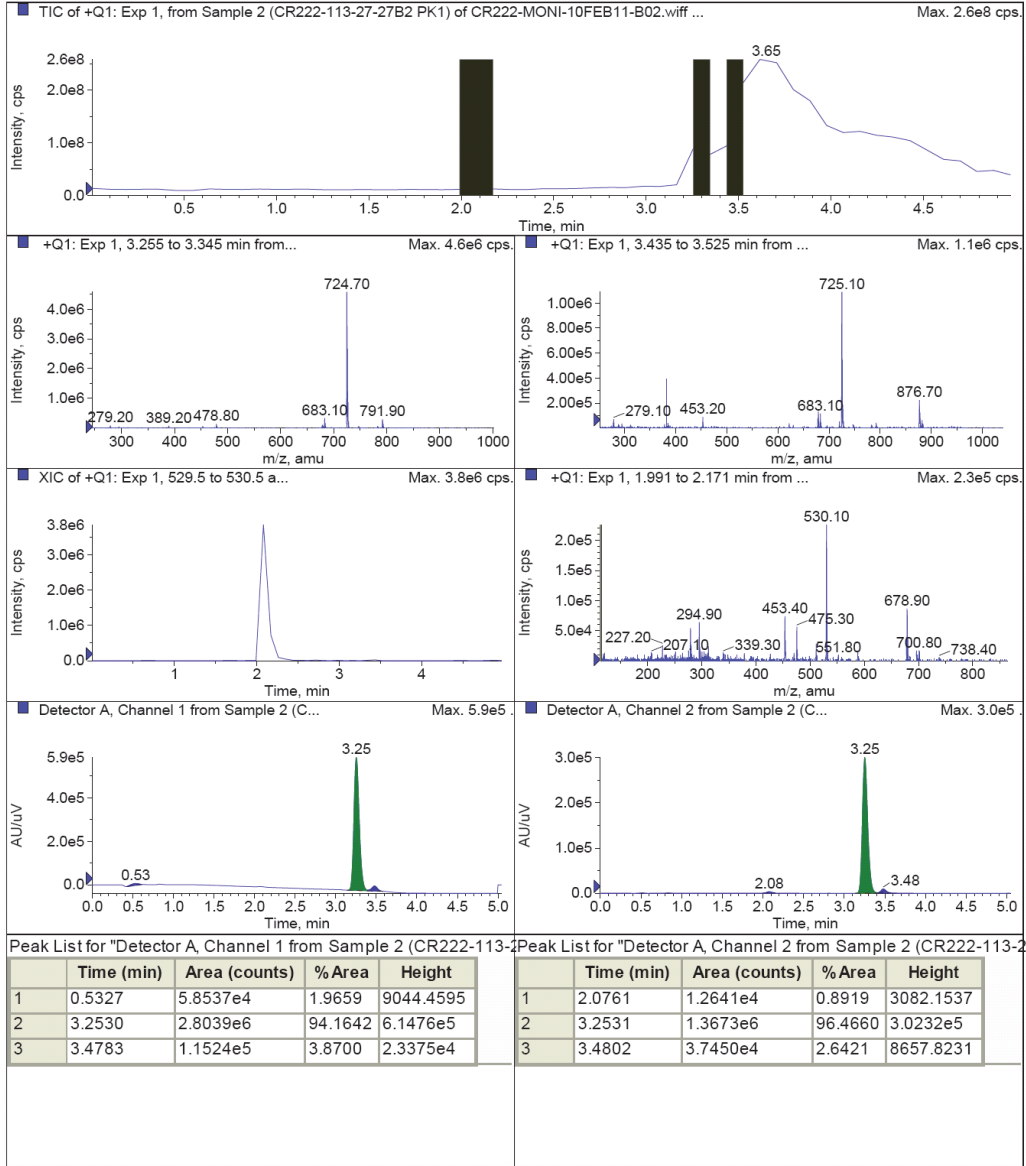

LCMS 2 Reaction Monitoring (NH4OAc Buffer) PEAK MERGED

Analyzed By : ASP

**Figure SII.18 HPLC profile of mixtures of 7'*R*-Me-cLNA-MeC (4a), 7'*S*-Me-cLNA-MeC (4b) and cENA-MeC (4c)**

```

-----
Sample : CR222-124-15-15A1                                CHIRAL HPLC

Column: CHIRALPAK-IC (4.6x250) 5µ
ARD/K/7461
Mobile Phase : HEXANE/ETOH : 70/30
Flow rate : 1.0 ml/min
Solubility : MEOH:DCM

Injection Date : Mon, 11. Oct. ->5:34:36 PM              Location   :   Vial 15
Inj. No.       :                                         Inj. No.   :     1

Acq Operator   : NARESH                                    Inj. Vol.  :     5 µl

Last Changed   : Tue, 12. Oct. 2010, 10:38:43 am

Acq. Method    : C:\Chem32\1\DATA\OCT-10\111010 2010-10-11 11-00-56\70 HEXANE-30
                  ETOH-1.M
-----

```

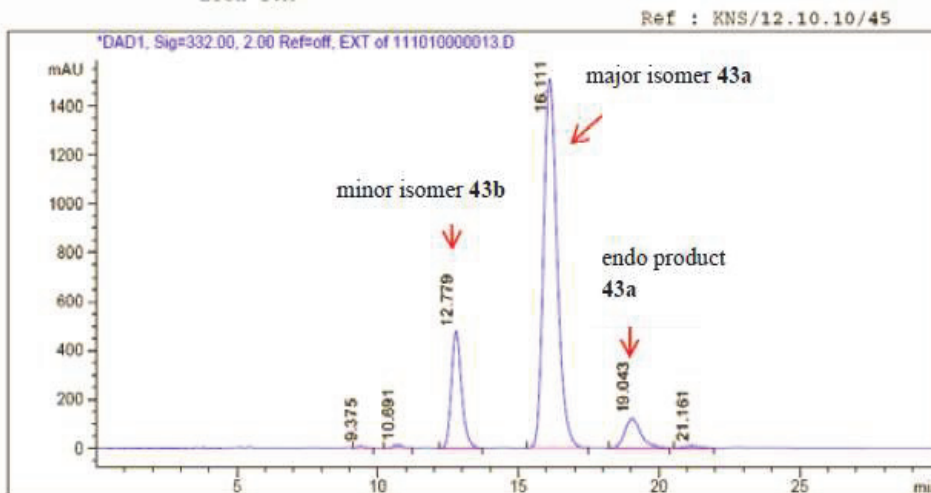

Signal 1: DAD1, Sig=332.00, 2.00 Ref=off, EXT

| Peak # | RT [min] | Area     | Area % |       |
|--------|----------|----------|--------|-------|
| 1      | 9.38     | 104.26   | 0.15   |       |
| 2      | 10.69    | 232.14   | 0.34   |       |
| 3      | 12.78    | 11956.79 | 17.61  | ← 43b |
| 4      | 16.11    | 50638.02 | 74.58  | ← 43a |
| 5      | 19.04    | 4703.85  | 6.93   | ← 43c |
| 6      | 21.16    | 263.62   | 0.39   |       |

\*\*\* End of Report \*\*\*

Figure SII.19 HPLC profile of pure 7'R-Me-cLNA-MeC (4a).

Column: CHIRALPAK-IC (4.6x250) 5 $\mu$   
ARD/K/7461  
Mobile Phase : HEXANE/ETOH : 70/30  
Flow rate : 1.0 ml/min  
Solubility : MEOH:DCM

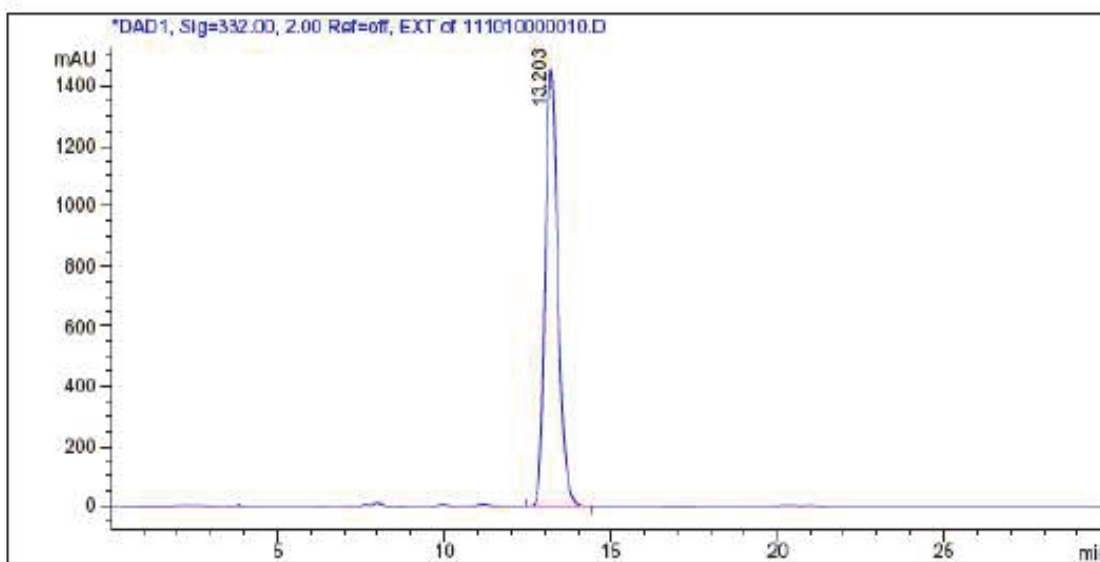

Signal 1: DAD1, Sig=332.00, 2.00 Ref=off, EXT

| Peak # | RT [min] | Area     | Area % |
|--------|----------|----------|--------|
| 1      | 13.20    | 39340.28 | 100.00 |

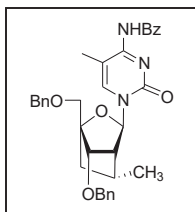

Figure SII.20 HPLC profile of pure 7'S-Me-cLNA-MeC (4b).

Column: CHIRALPAK-IC (4.6x250) 5 $\mu$   
ARD/K/7461  
Mobile Phase : HEXANE/EIOH : 70/30  
Flow rate : 1.0 ml/min  
Solubility : MEOH:DCM

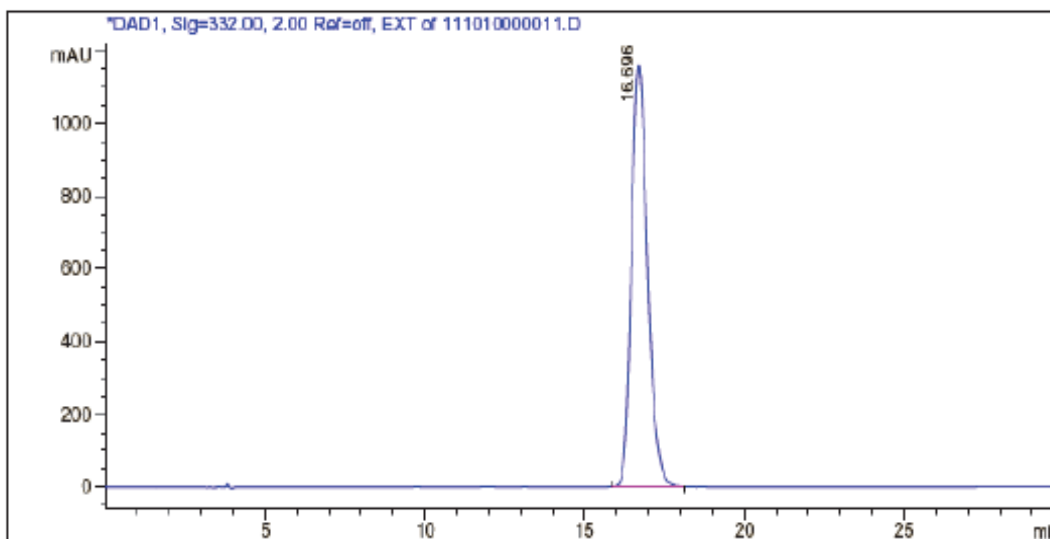

Signal 1: DAD1, Sig=332.00, 2.00 Ref=off, EXT

| Peak # | RT [min] | Area     | Area % |
|--------|----------|----------|--------|
| 1      | 16.70    | 40555.03 | 100.00 |

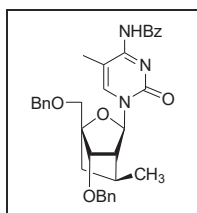

Figure SII.21 HPLC profile of pure cENA-<sup>Me</sup>C (4c).

Column: CHIRALPAK-IC (4.6x250) 5μ  
ARD/K/7461  
Mobile Phase : HEXANE/ETOH : 70/30  
Flow rate : 1.0 ml/min  
Solubility : MECH:DCM

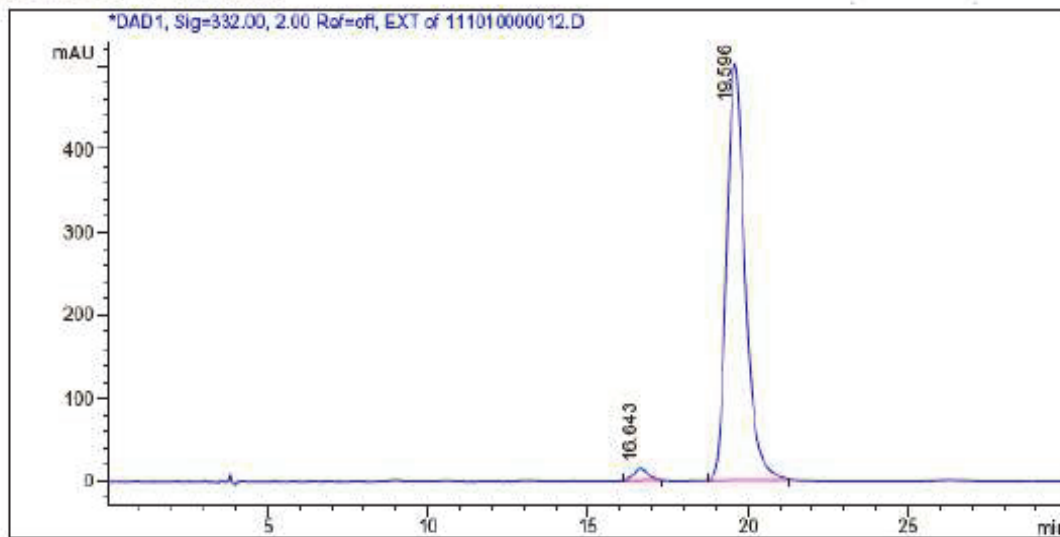

Signal 1: DAD1, Sig=332.00, 2.00 Ref=off, EXT

| Peak # | RT [min] | Area     | Area % |
|--------|----------|----------|--------|
| 1      | 16.64    | 443.32   | 2.15   |
| 2      | 19.60    | 20186.01 | 97.85  |

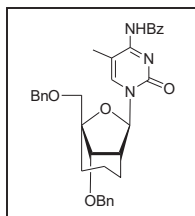



Figure SII.22 HPLC profile of mixtures of 7'R-Me-cLNA-T (5a), 7'S-Me-cLNA-T (5b) and cENA-T (5c).

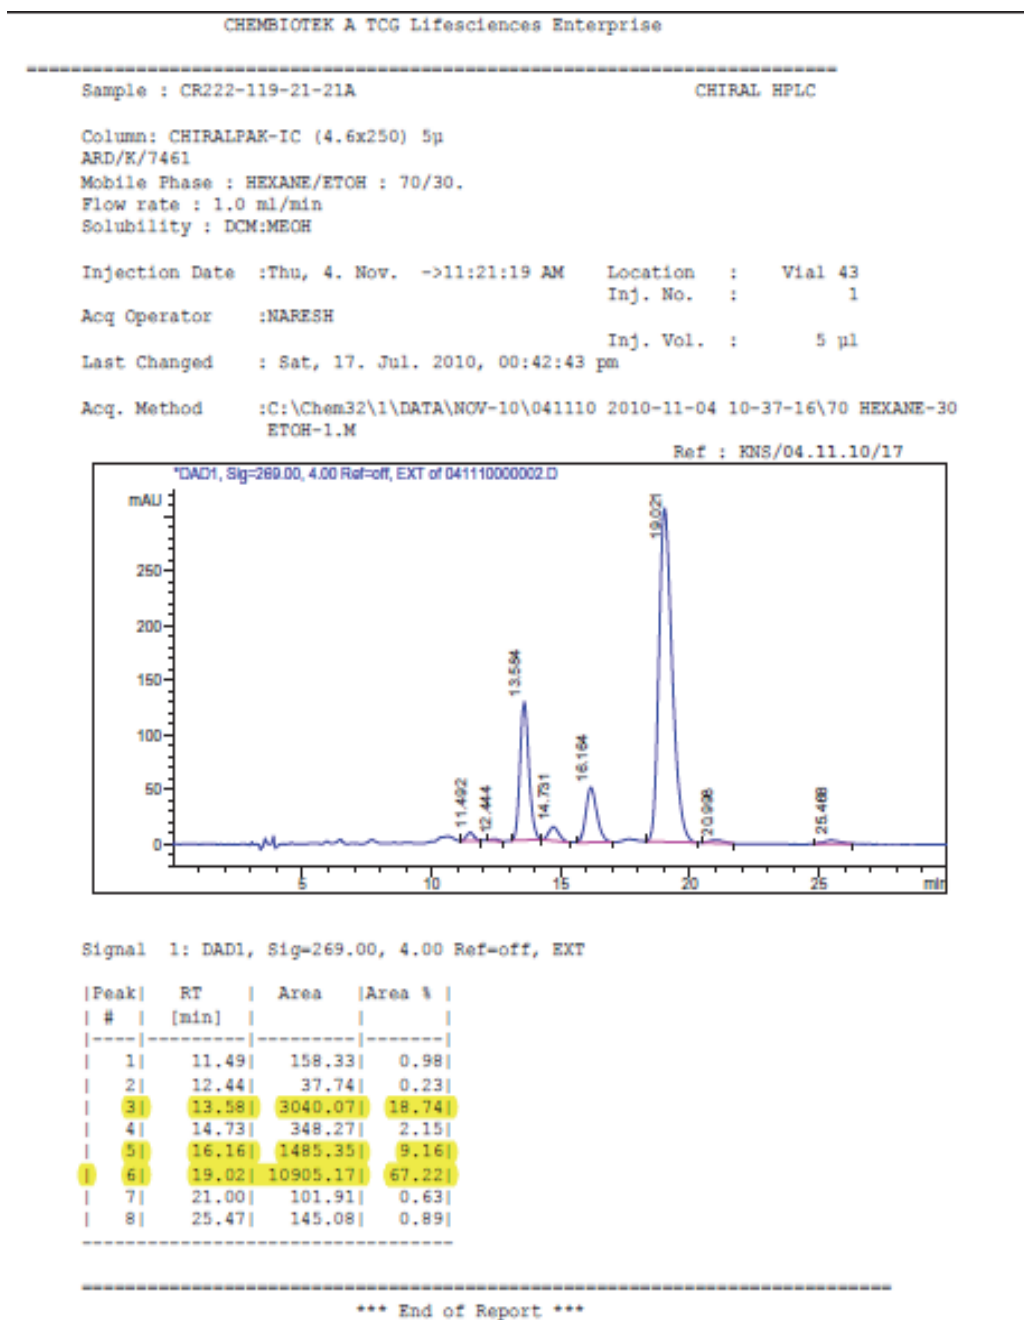

Minor (7'S)

6'-endo

Major (7'R)

Figure SII.23 HPLC profile of pure 7'R-Me-cLNA-T (5a).

CHEMBIOTEK A TCG Lifesciences Enterprise

Sample ID : CR222-119-21-21A-PEAK-3

Column : CHIRALPAK-IC (4.6x 250mm) 5 $\mu$

ARD/K/7461

Mobile Phase : HEXANE/ETOH : 70/30.

Flow rate : 1.0 ml/min

Solubility : DCM.

Injection Date : Tue, 16. ->9:16:15 PM

->  
Location : Vial 28

Inj. No. : 1

Inj. Vol. : 5  $\mu$ l

Acq Operator : NARESH

Last Changed : Wed, 17. Nov. 2010, 04:19:26 pm

Acq. Method : C:\Chem32\1\DATA\NOV-10\161110 2010-11-16 16-47-33\70 HEXANE-30  
ETOH-1.M

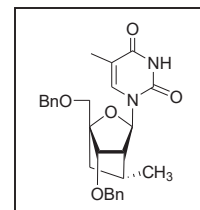

Ref : KNS/18.11.10/17

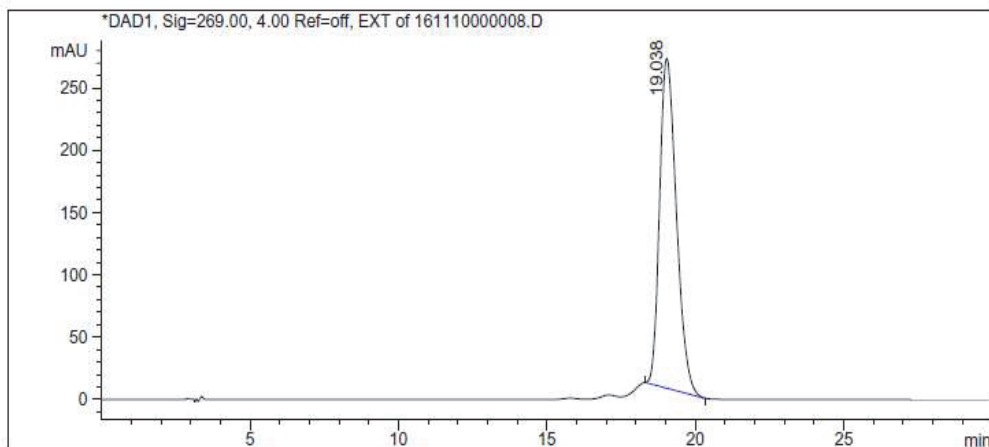

Signal 1: DAD1, Sig=269.00, 4.00 Ref=off, EXT

| Peak # | RT [min] | Area     | Area % |
|--------|----------|----------|--------|
| 1      | 19.04    | 10392.84 | 100.00 |

\*\*\* End of Report \*\*\*

**Figure SII.24 HPLC profile of pure 7'S-Me-cLNA-T (5b).**

CHEMBIOTEK A TCG Lifesciences Enterprise

Sample ID : CR222-119-21-21A-PEAK-1

Column : CHIRALPAK-IC (4.6x 250mm) 5µ

ARD/K/7461

Mobile Phase : HEXANE/ETOH : 70/30.

Flow rate : 1.0 ml/min

Solubility : DCM.

Injection Date : Tue, 16. ->9:47:47 PM

->

Location : Vial 26

Inj. No. : 1

Inj. Vol. : 8 µl

Acq Operator : NARESH

Last Changed : Wed, 17. Nov. 2010, 04:19:26 pm

Acq. Method : C:\Chem32\1\DATA\NOV-10\161110 2010-11-16 16-47-33\70 HEXANE-30 ETOH-1.M

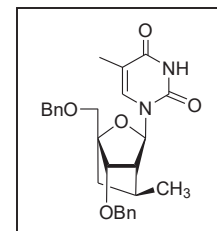

Ref : KNS/18.11.10/17

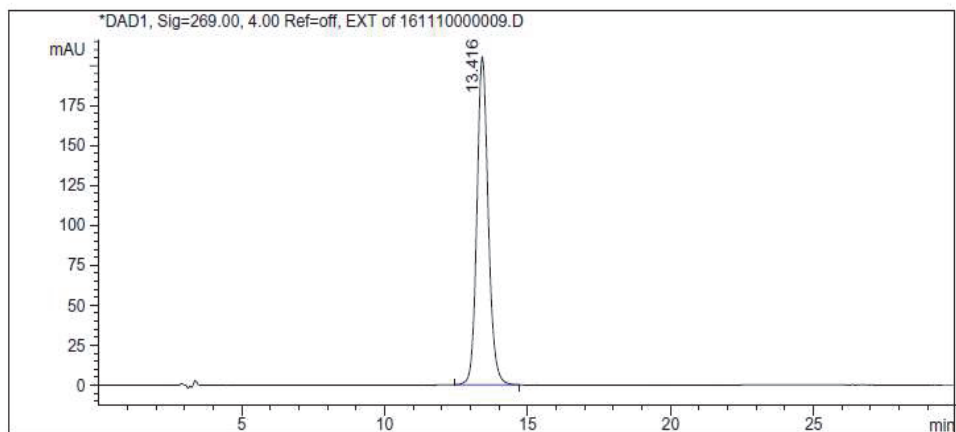

Signal 1: DAD1, Sig=269.00, 4.00 Ref=off, EXT

| Peak # | RT [min] | Area    | Area % |
|--------|----------|---------|--------|
| 1      | 13.42    | 5677.62 | 100.00 |

\*\*\* End of Report \*\*\*

**Figure SII.25 HPLC profile of pure cENA-T (5c).**

CHEMBIOTEK A TCG Lifesciences Enterprise

Sample ID : CR222-119-21-21A-PEAK-2

Column : CHIRALPAK-IC (4.6x 250mm) 5µ

ARD/K/7461

Mobile Phase : HEXANE/ETOH : 70/30.

Flow rate : 1.0 ml/min

Solubility : DCM.

Injection Date : Tue, 16. ->10:19:21 PM

Location : Vial 27

Inj. No. : 1

Acq Operator : NARESH

Inj. Vol. : 8 µl

Last Changed : Wed, 17. Nov. 2010, 04:19:26 pm

Acq. Method : C:\Chem32\1\DATA\NOV-10\161110 2010-11-16 16-47-33\70 HEXANE-30  
ETOH-1.M

Ref : KNS/18.11.10/17

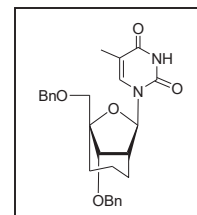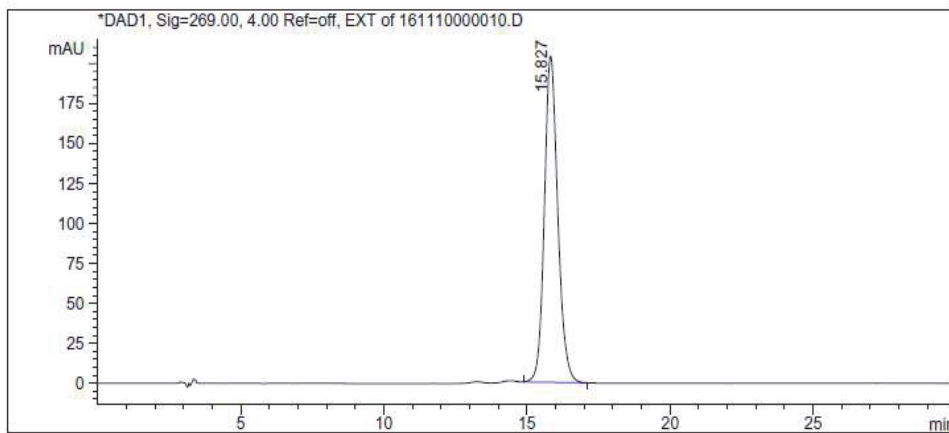

Signal 1: DAD1, Sig=269.00, 4.00 Ref=off, EXT

| Peak # | RT [min] | Area    | Area % |
|--------|----------|---------|--------|
| 1      | 15.83    | 6655.12 | 100.00 |

\*\*\* End of Report \*\*\*

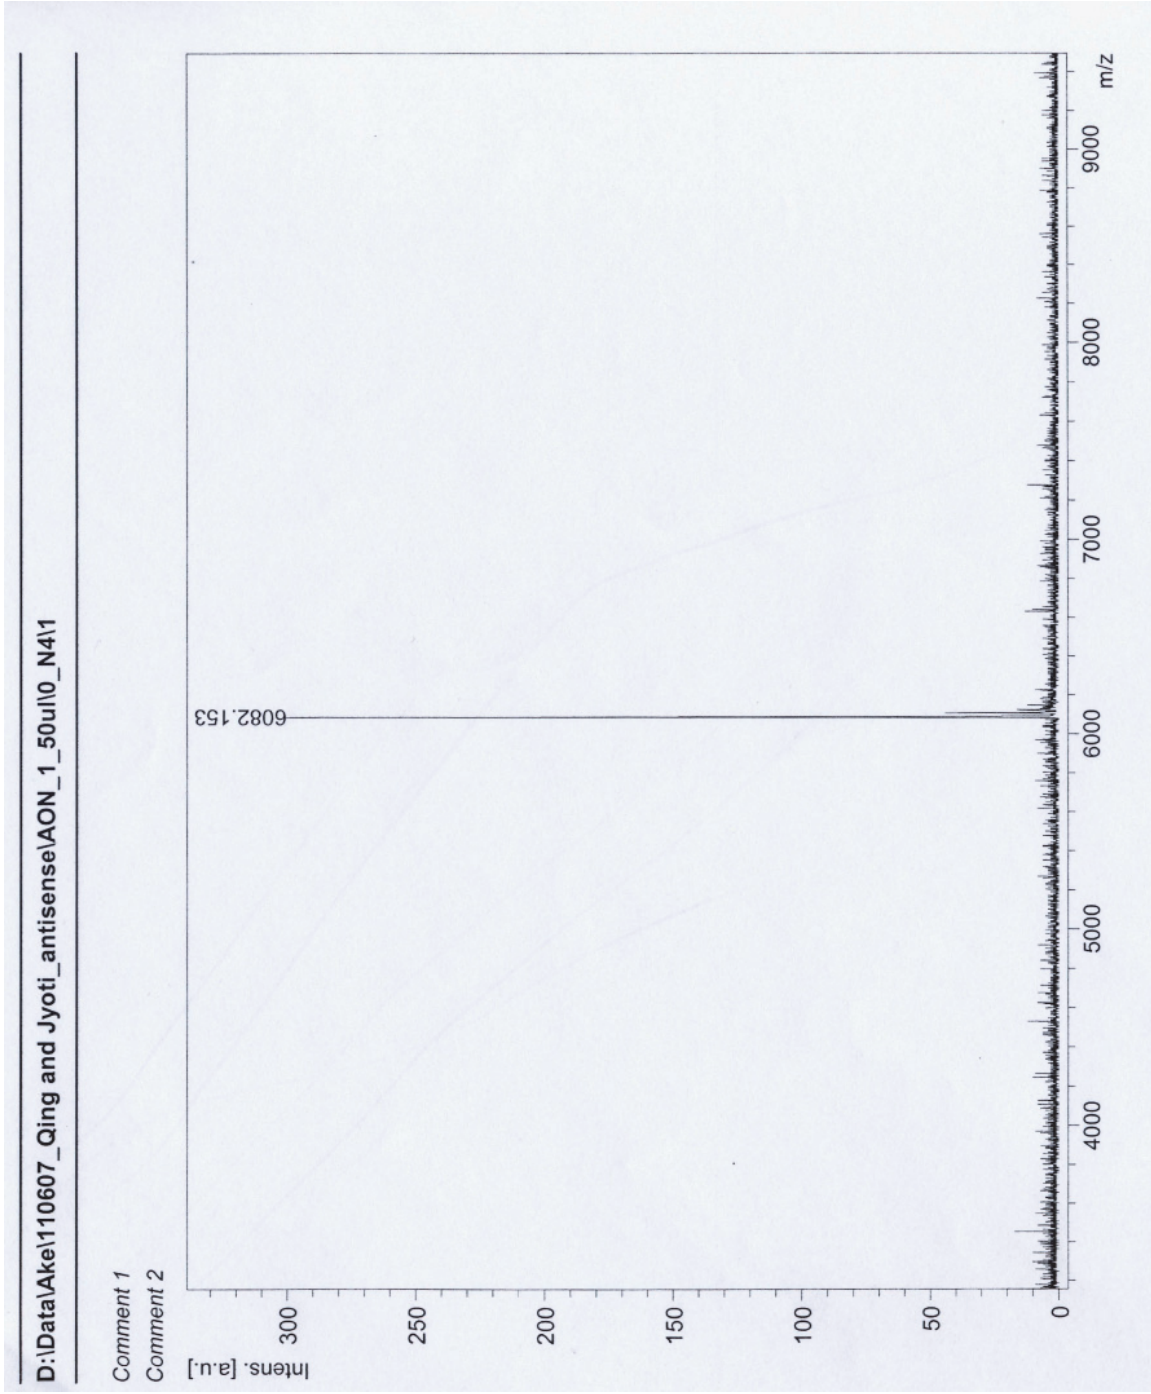

Figure SII.26 MALDI-TOF spectrum of AON1

D:\Data\Akel\110607\_Qing and Jyoti\_antisense\AON\_2\_50ul\0\_D5\1

Comment 1

Comment 2

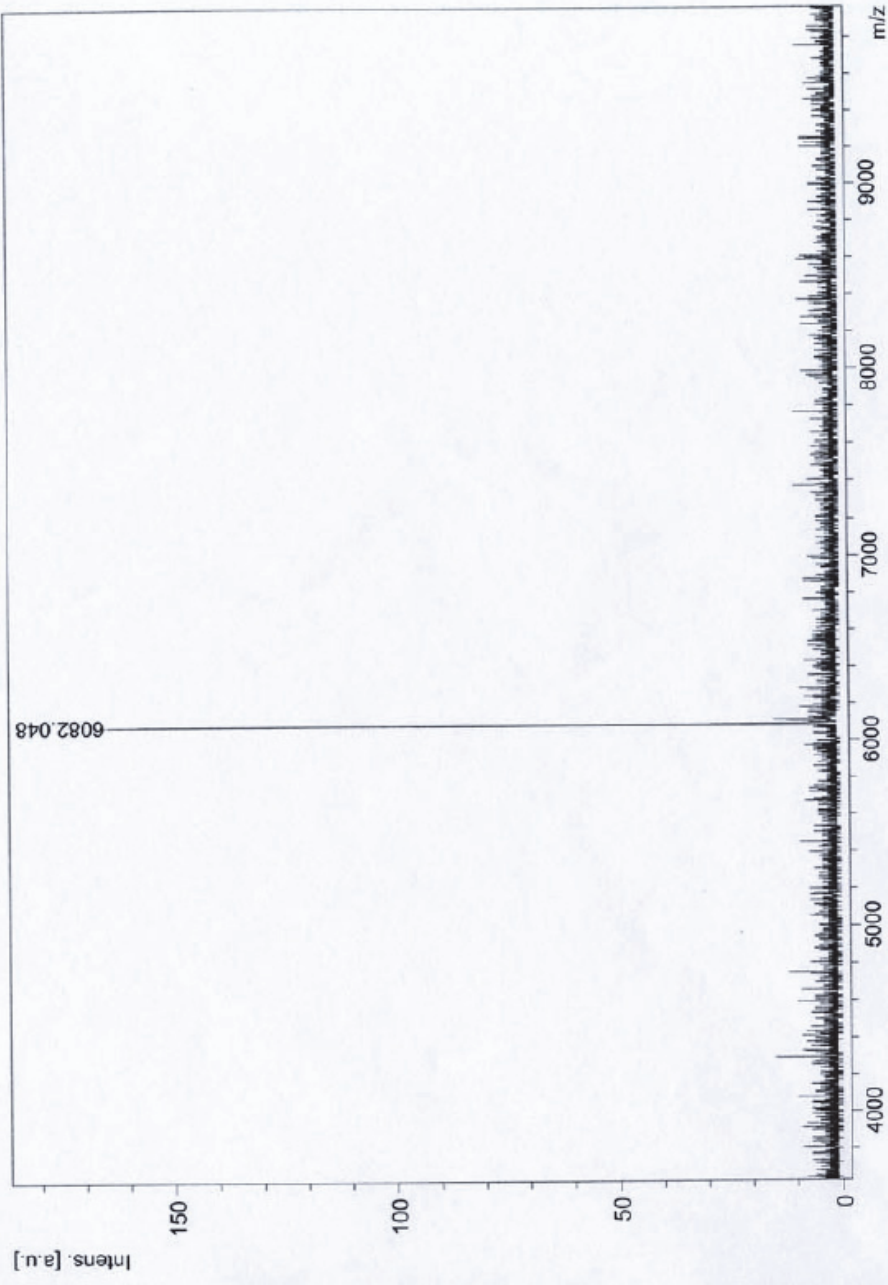

Figure S11.27 MALDI-TOF spectrum of AON2



D:\Data\Ake\110607\_Qing and Jyoti\_antisense\AON\_3\_50ul\0\_D61

Comment 1

Comment 2

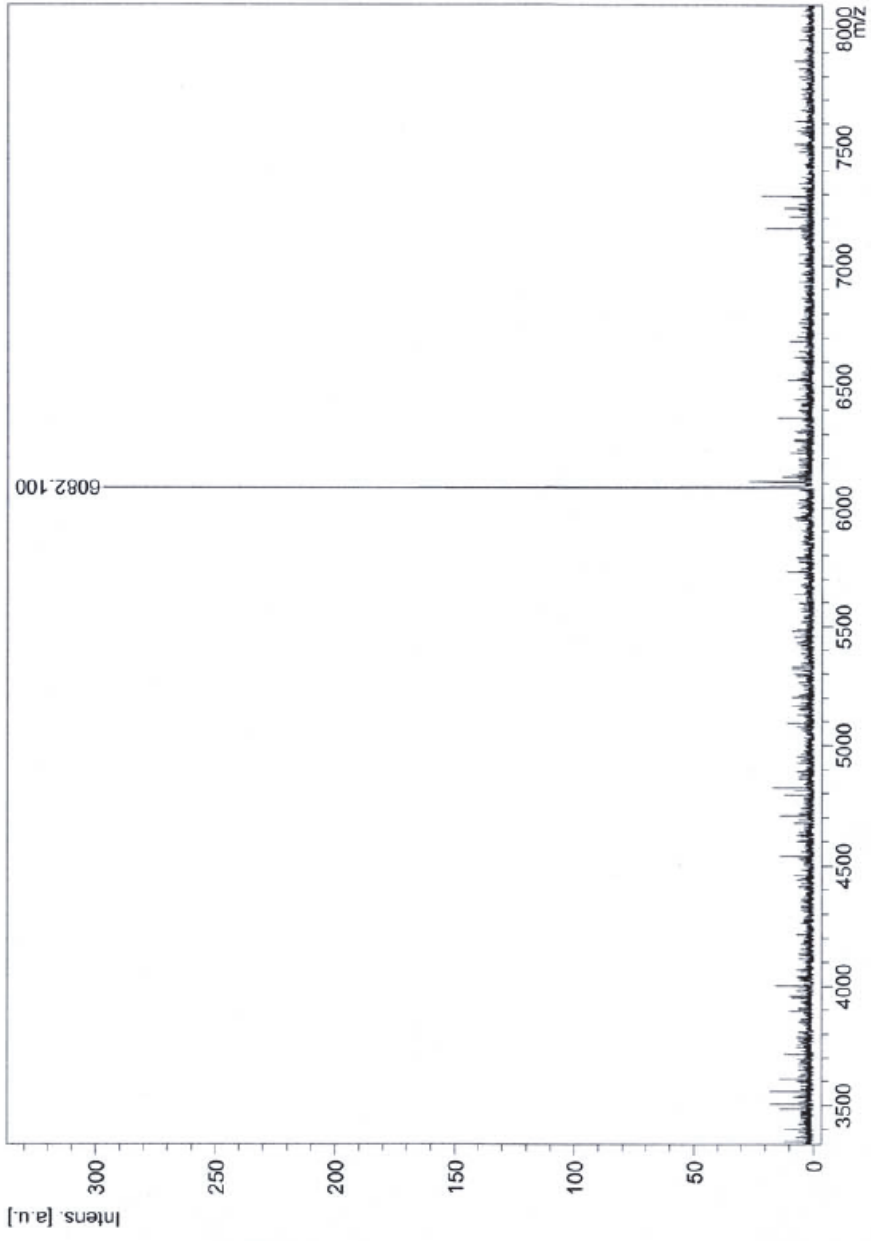

Figure SII.28 MALDI-TOF spectrum of AON3



D:\Data\Ake110607\_Qing and Jyoti\_antisense\AON\_4\_10\U10\_D711

Comment 1

Comment 2

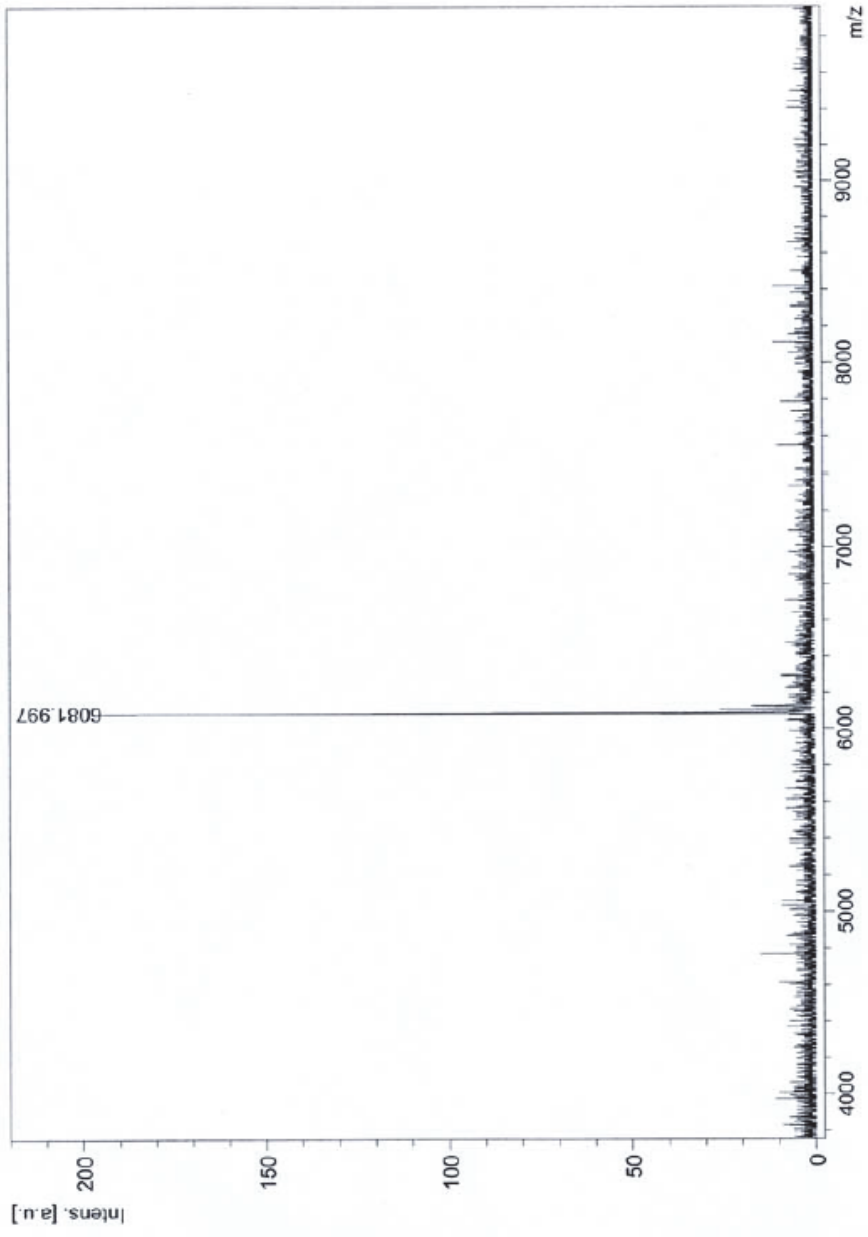

Figure SII.29 MALDI-TOF spectrum of AON4

D:\Data\Ake\110607\_Qing and Jyoti\_antisense\AON\_5\_50u\10\_E5\1

Comment 1

Comment 2

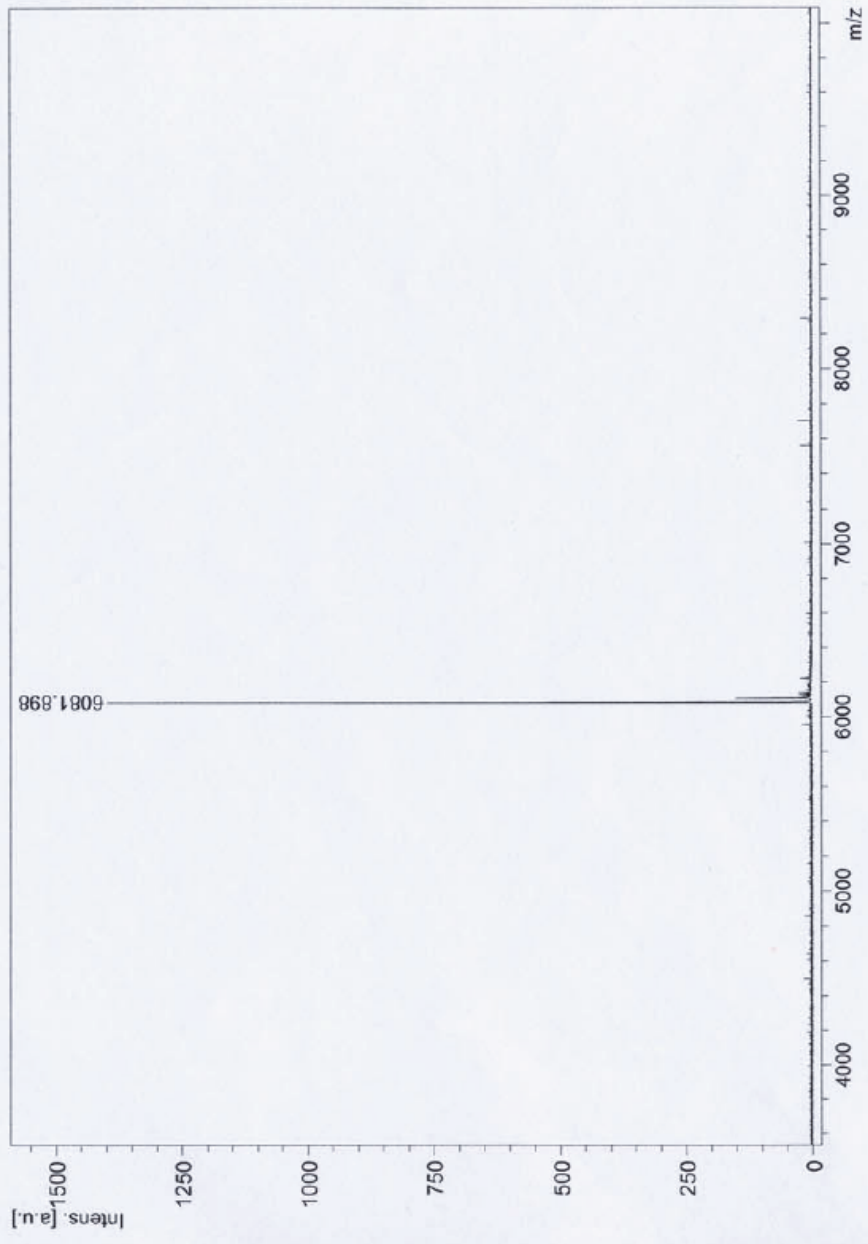

Figure SII.30 MALDI-TOF spectrum of AON5

D:\Data\Ake\110607\_Qing and Jyoti\_antisense\AON\_6\_10u10\_E611

Comment 1

Comment 2

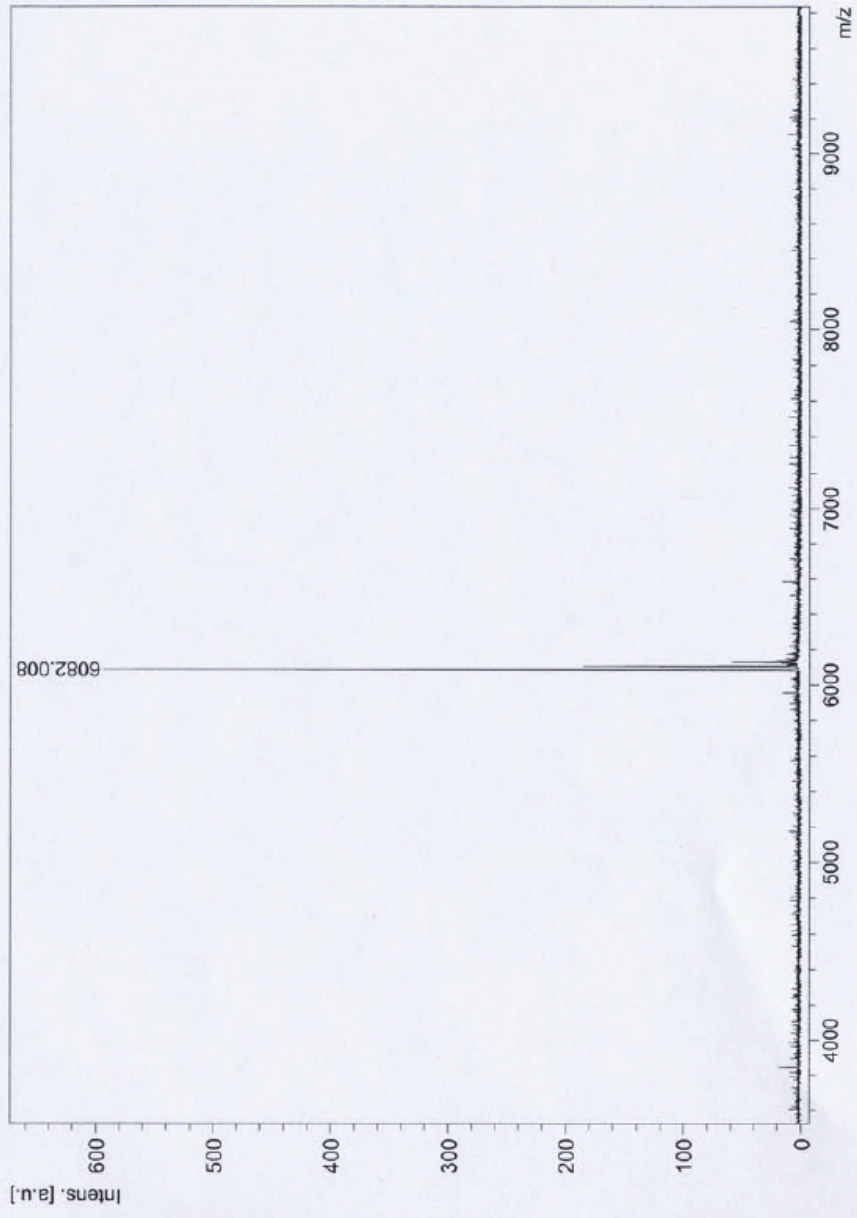

Figure SII.31 MALDI-TOF spectrum of AON6

D:\Data\Ake\110607\_Qing and Jyoti\_antisense\AON\_7\_50u\10\_E7\1

Comment 1

Comment 2

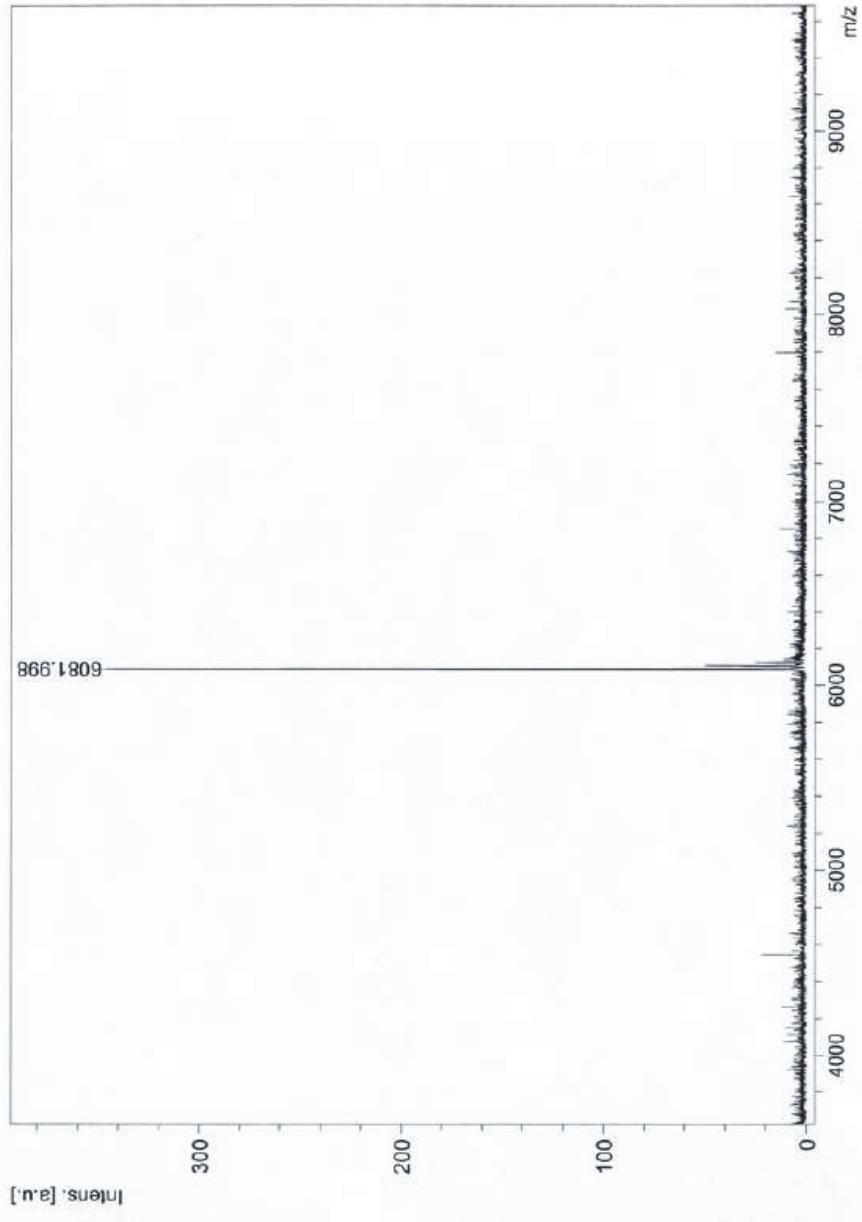

Figure SII.32 MALDI-TOF spectrum of AON7

D:\Data\Ake\110607\_Qing and Jyoti\_antisense\AON\_8\_50ul\0\_F51

Comment 1

Comment 2

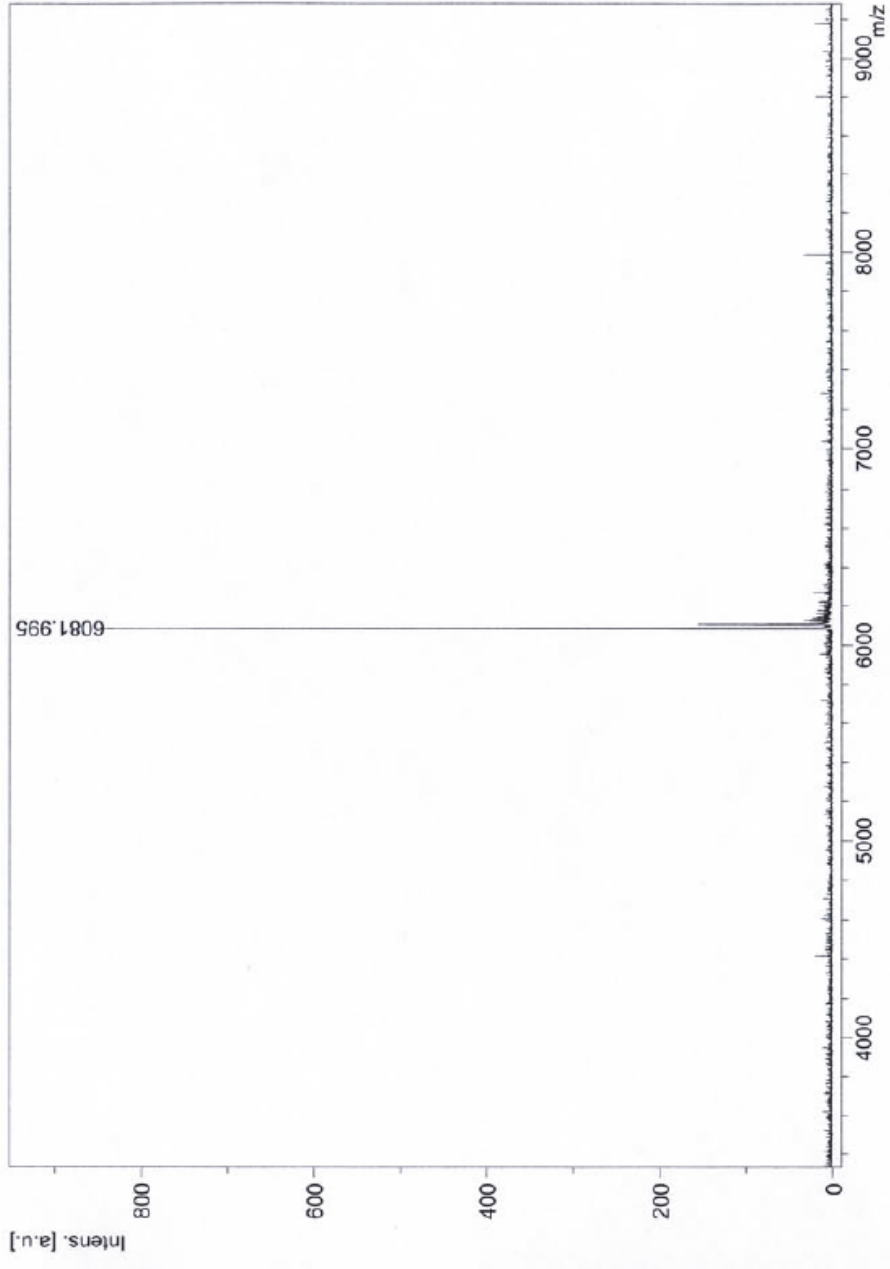

Figure SII.33 MALDI-TOF spectrum of AON8

D:\Data\Akel110607\_Qing and Jyoti\_antisense\AON\_9\_50ul\0\_F61

Comment 1

Comment 2

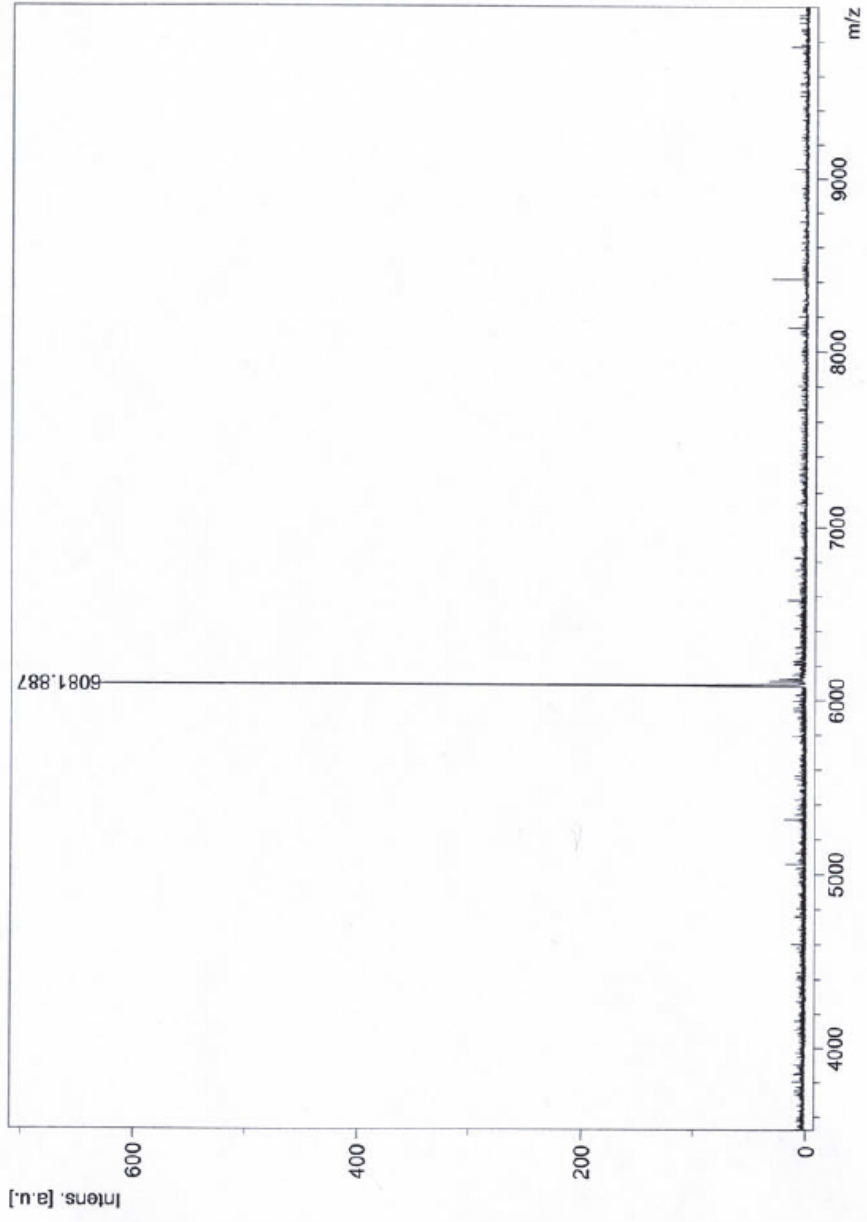

Figure SII.34 MALDI-TOF spectrum of AON9

D:\Data\Ake\110607\_Qing and Jyoti\_antisense\AON\_10\_10u\10\_F711

Comment 1

Comment 2

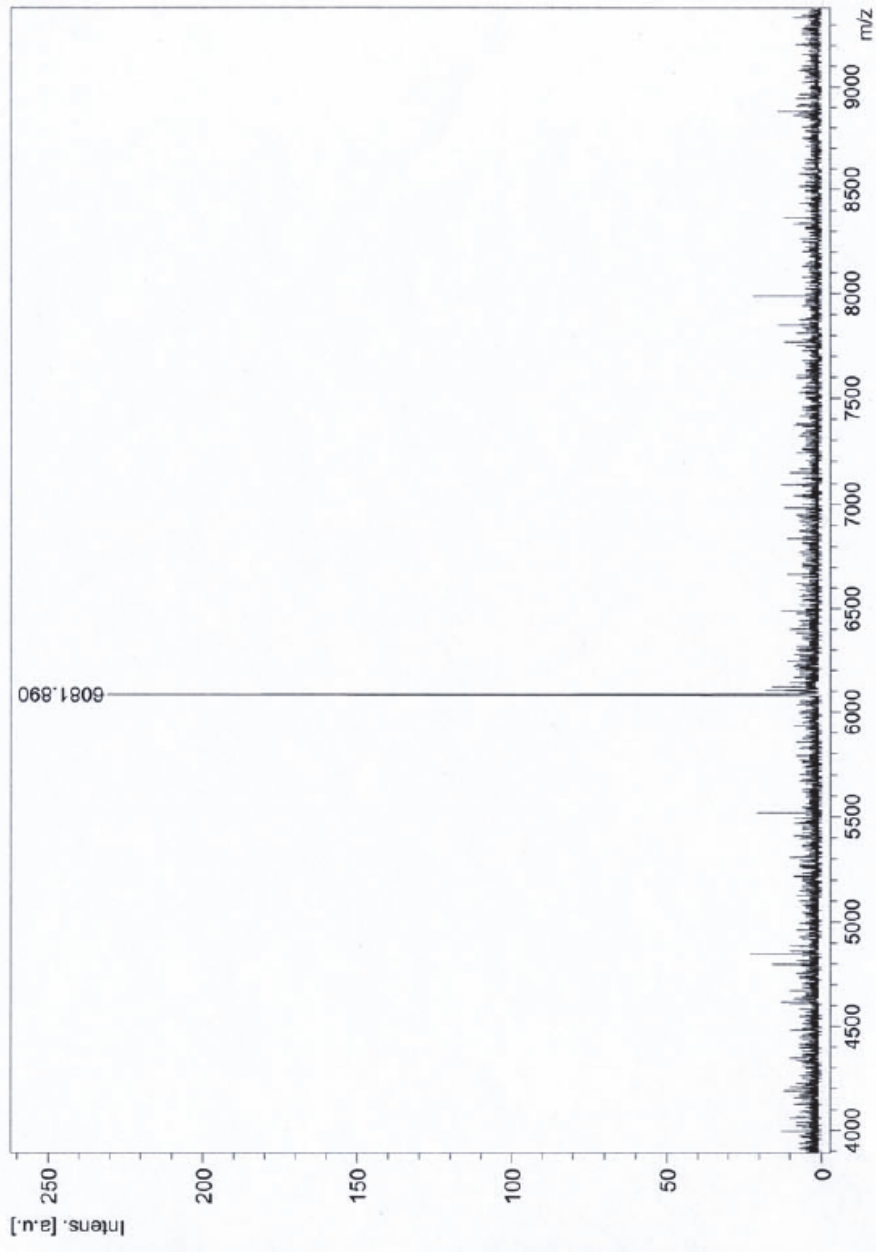

Figure SII.35 MALDI-TOF spectrum of AON10

D:\Data\Ake\110607\_Qing and Jyoti\_antisense\AON\_11\_50u\10\_G51

Comment 1

Comment 2

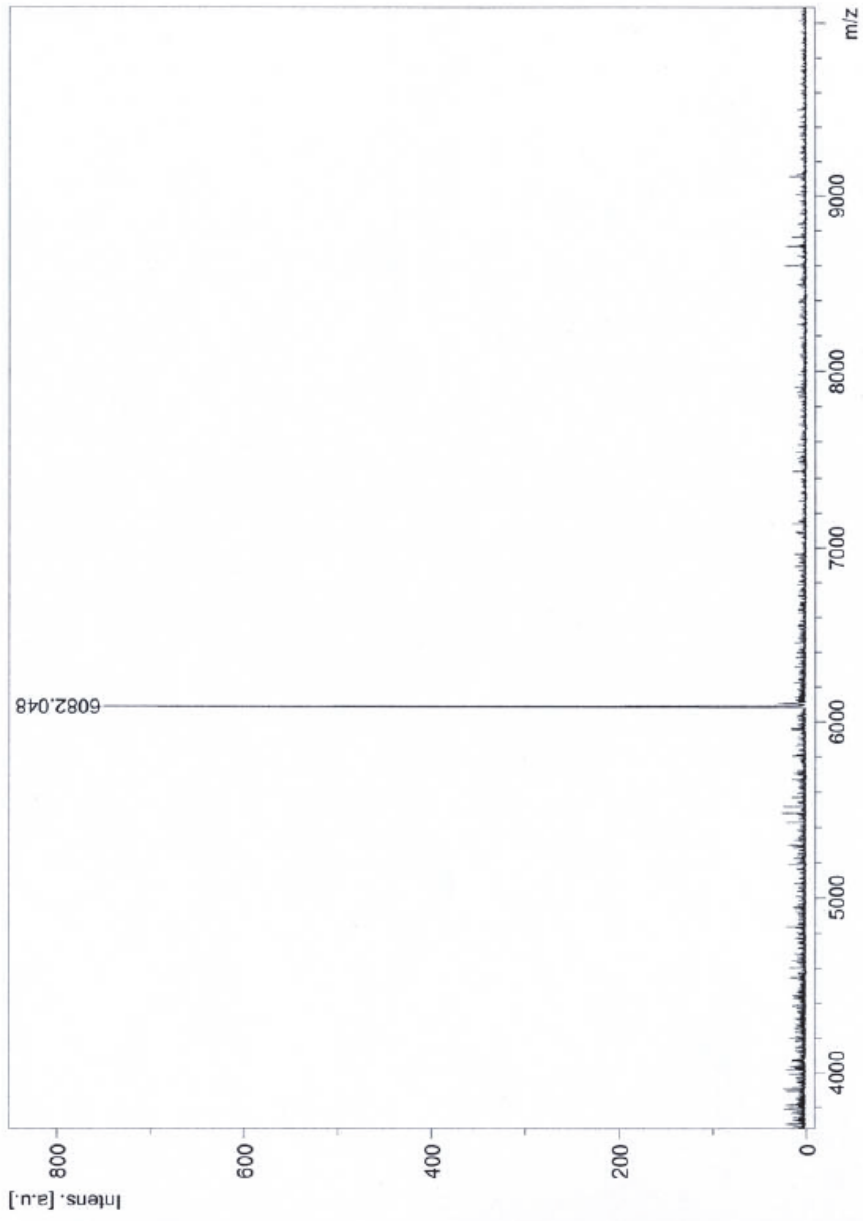

Figure SII.36 MALDI-TOF spectrum of AON11



D:\Data\Ake\110607\_Qing and Jyoti\_antisense\AON\_12\_50uh10\_G611

Comment 1  
Comment 2

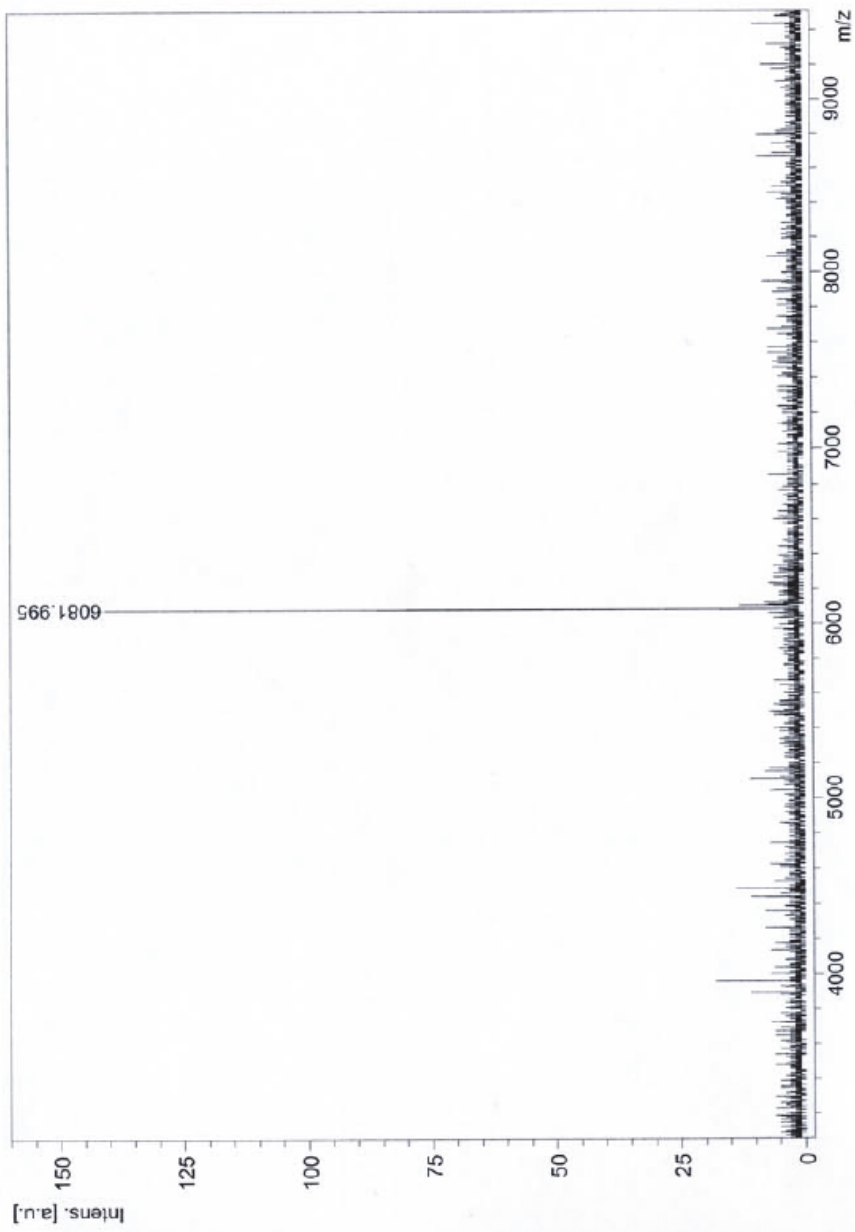

Figure SII.37 MALDI-TOF spectrum of AON12

D:\Data\Ake\110607\_Qing and Jyoti\_antisense\AON\_13\_50\I10\_G711

Comment 1

Comment 2

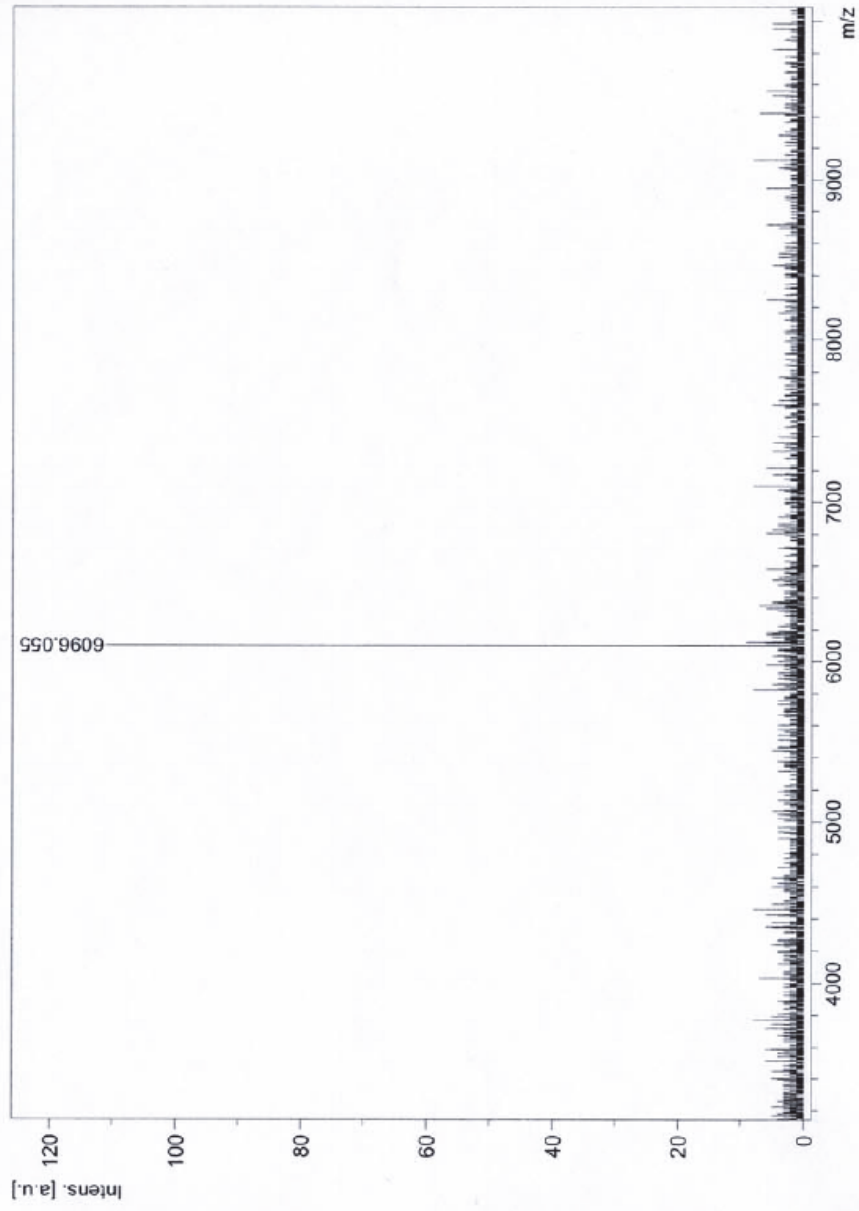

Figure SII.38 MALDI-TOF spectrum of AON13

D:\Data\Ake\110607\_Qing and Jyoti\_antisense\AON\_14\_10\10\_H51

Comment 1

Comment 2

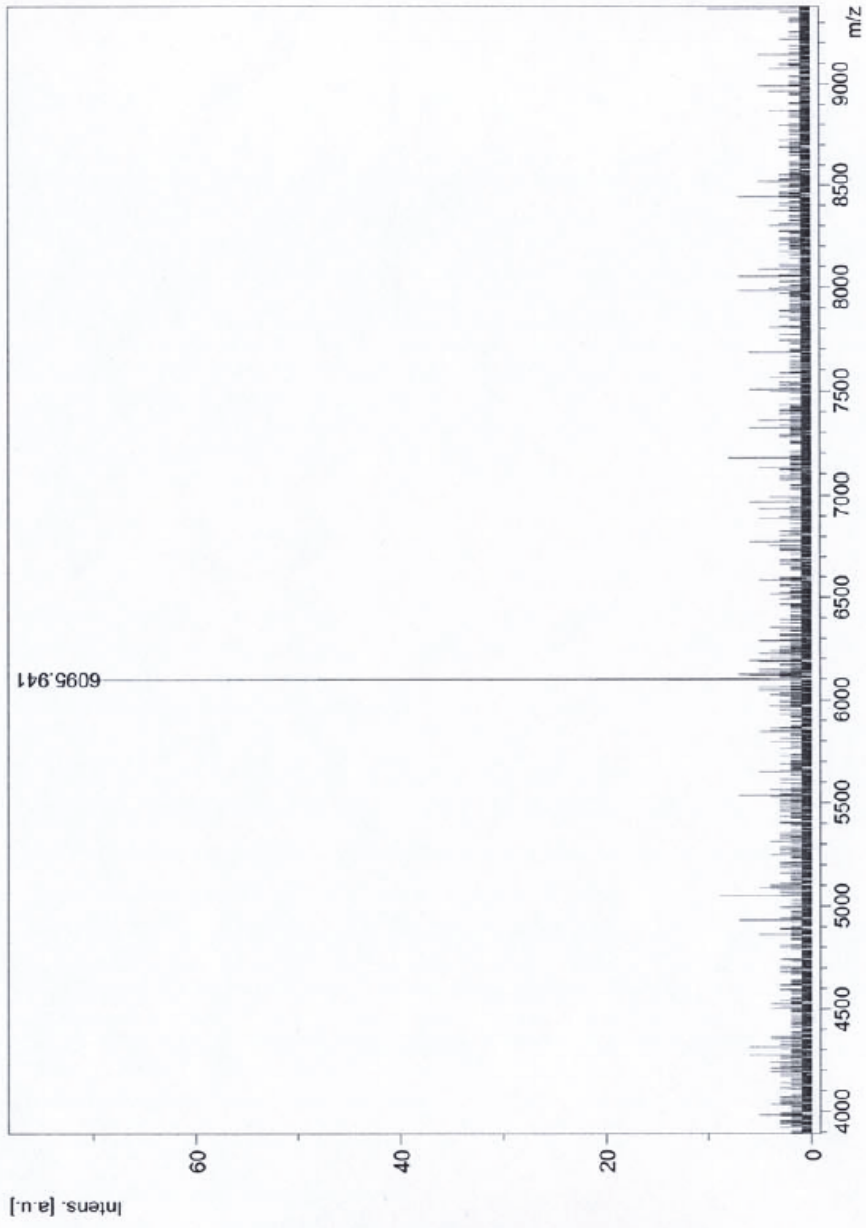

Figure SII.39 MALDI-TOF spectrum of AON14

D:\Data\Ake\110607\_Qing and Jyoti\_antisense\AON\_15\_50ul\0\_H611

Comment 1

Comment 2

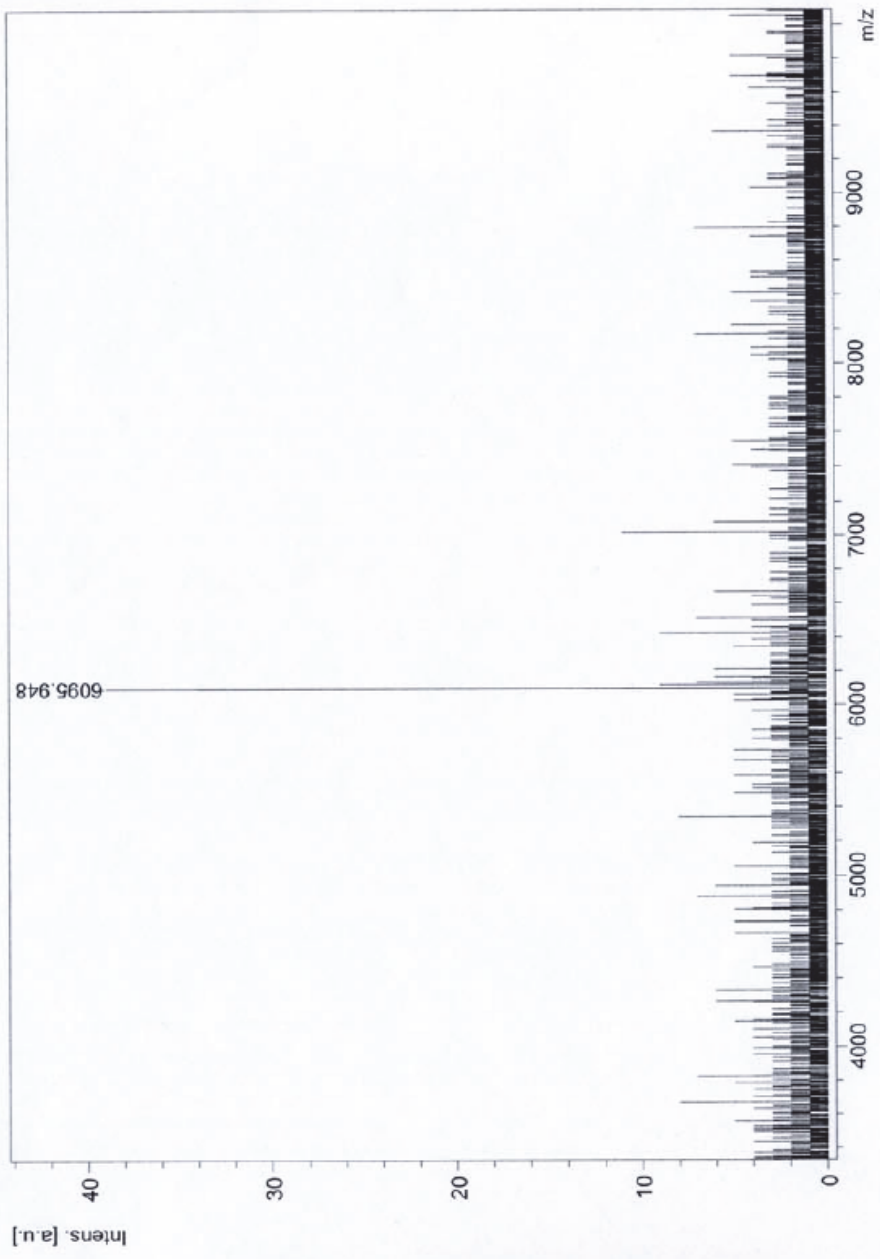

Figure SII.40 MALDI-TOF spectrum of AON15

D:\Data\Ake\110607\_Qing and Jyoti\_antisense\AON\_16\_50ul\0\_H711

Comment 1

Comment 2

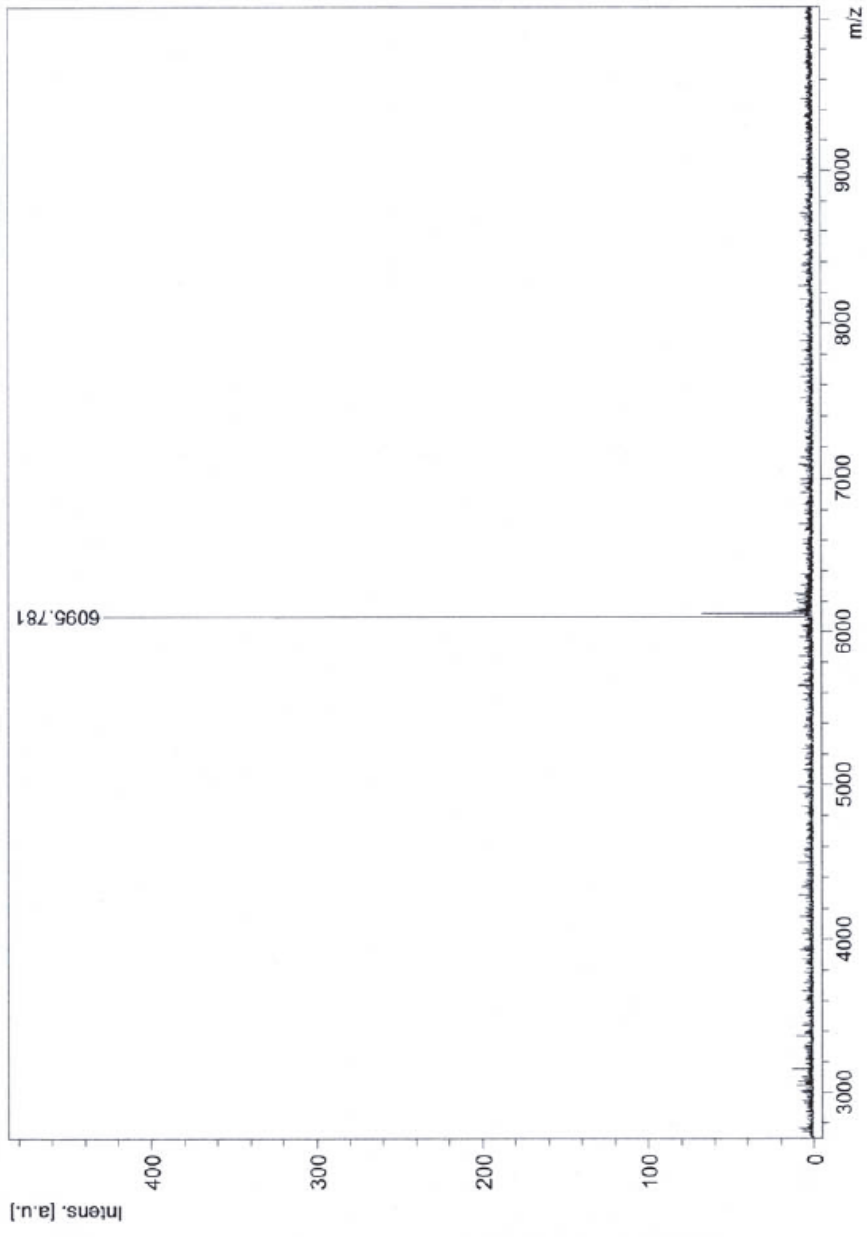

Figure SII.41 MALDI-TOF spectrum of AON16

D:\Data\Akel\110607\_Qing and Jyoti\_antisense\AON\_17\_50ul\0\_1511

Comment 1

Comment 2

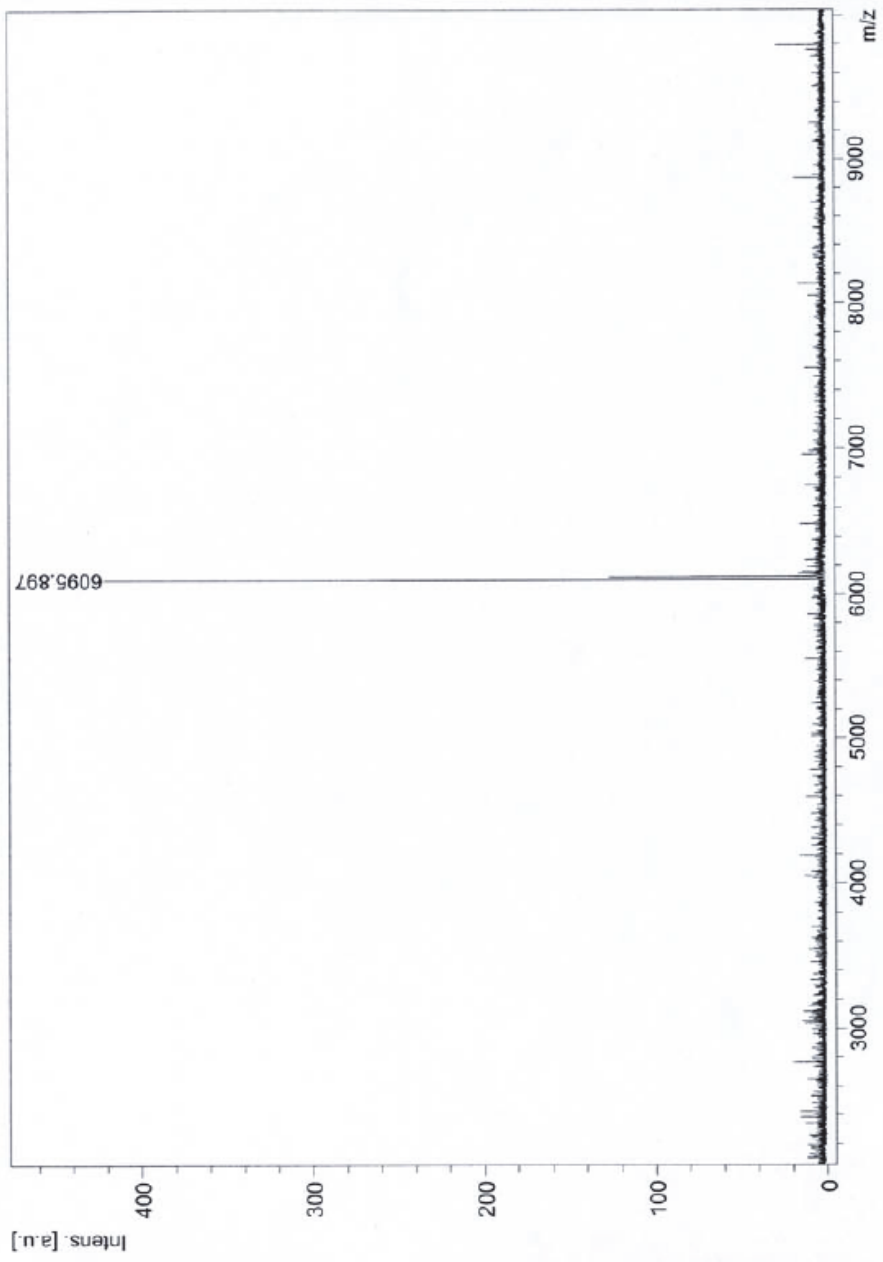

Figure SII.42 MALDI-TOF spectrum of AON17

D:\Data\Ake\110607\_Qing and Jyoti\_antisense\AON\_18\_50ul\0\_16\1

Comment 1

Comment 2

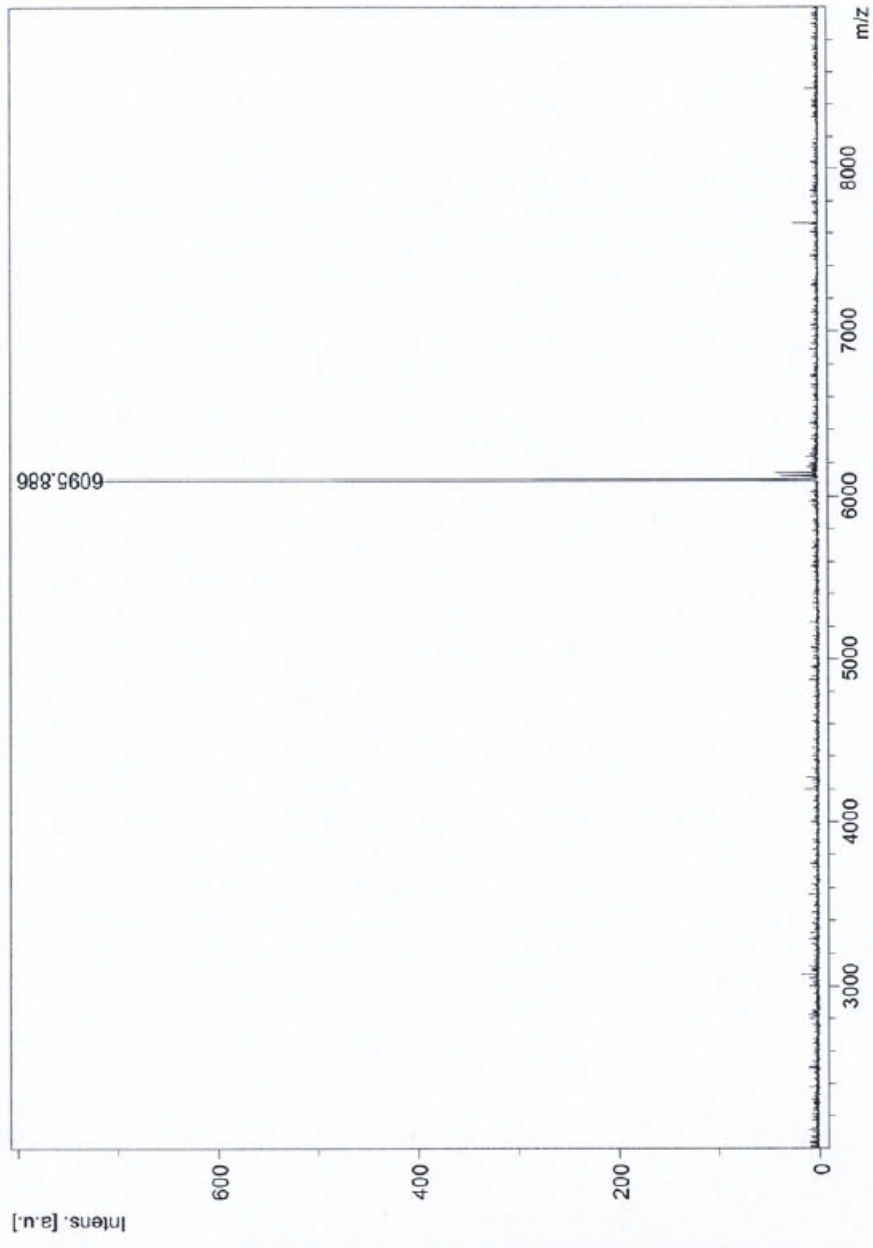

Figure SII.43 MALDI-TOF spectrum of AON18

D:\Data\Ake\110607\_Qing and Jyoti\_antisense\AON\_19\_50u\10\_1711

Comment 1

Comment 2

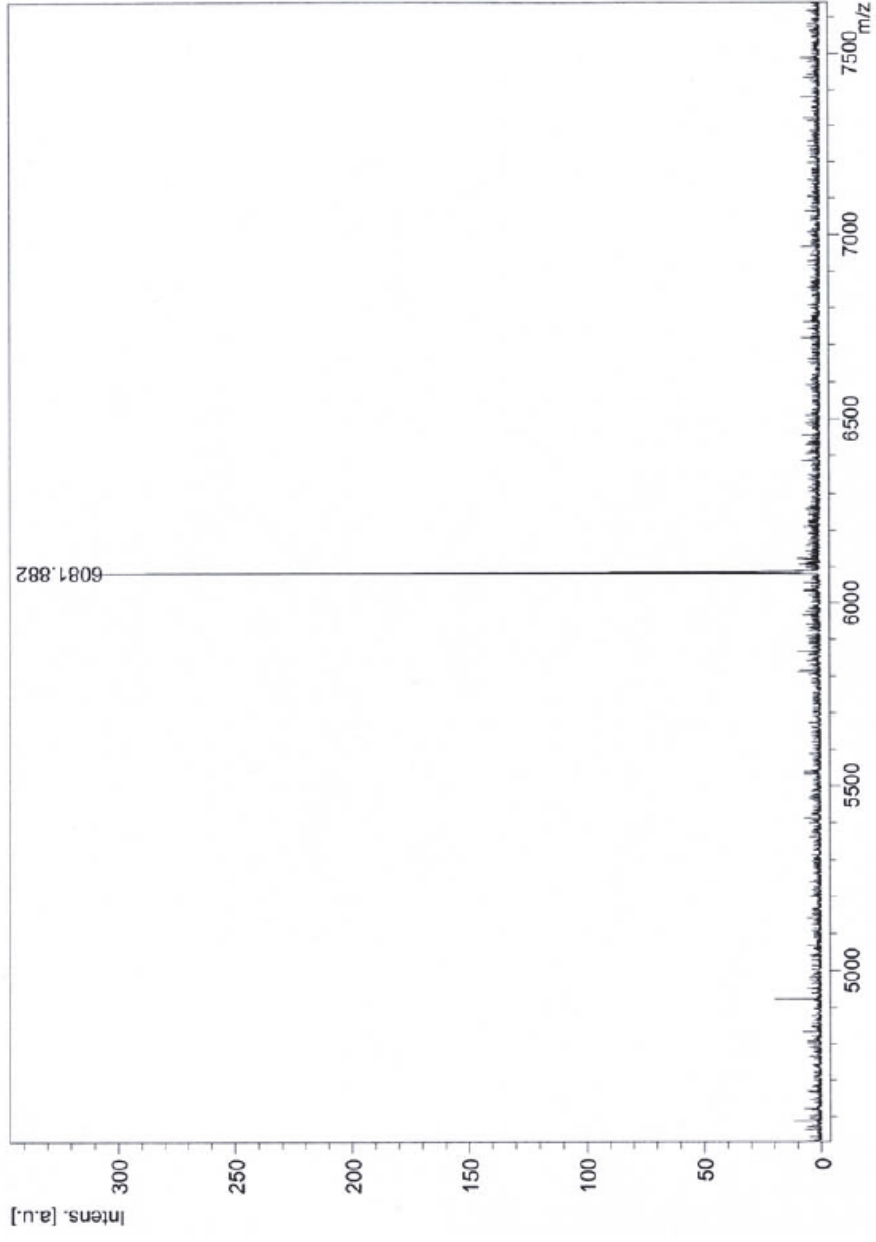

Figure SII.44 MALDI-TOF spectrum of AON19



D:\Data\Ake\110607\_Qing and Jyoti\_antisense\AON\_20\_50ul\10\_J5\1

Comment 1

Comment 2

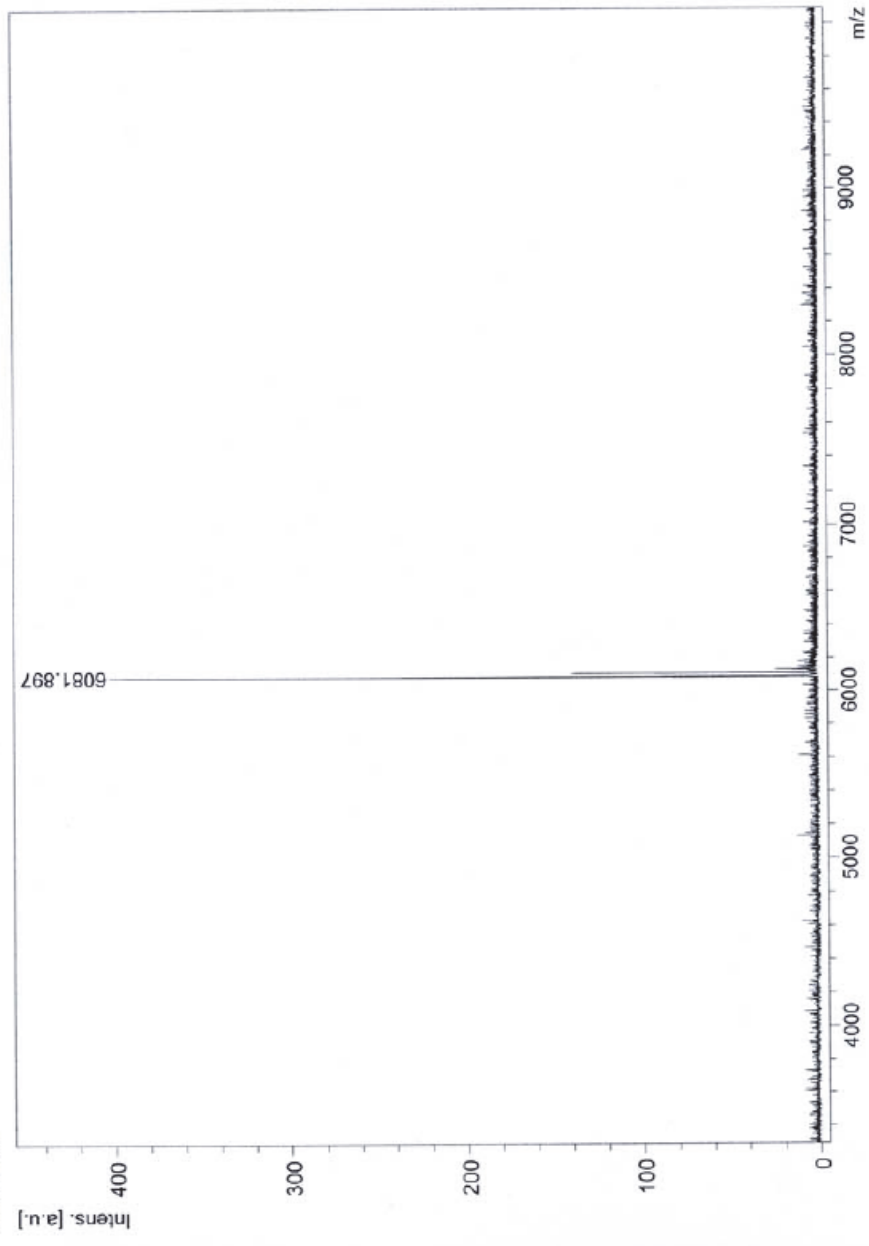

Figure SII.45 MALDI-TOF spectrum of AON20

D:\Data\Akel110607\_Qing and Jyoti\_antisense\AON\_21\_10u\10\_J611

Comment 1

Comment 2

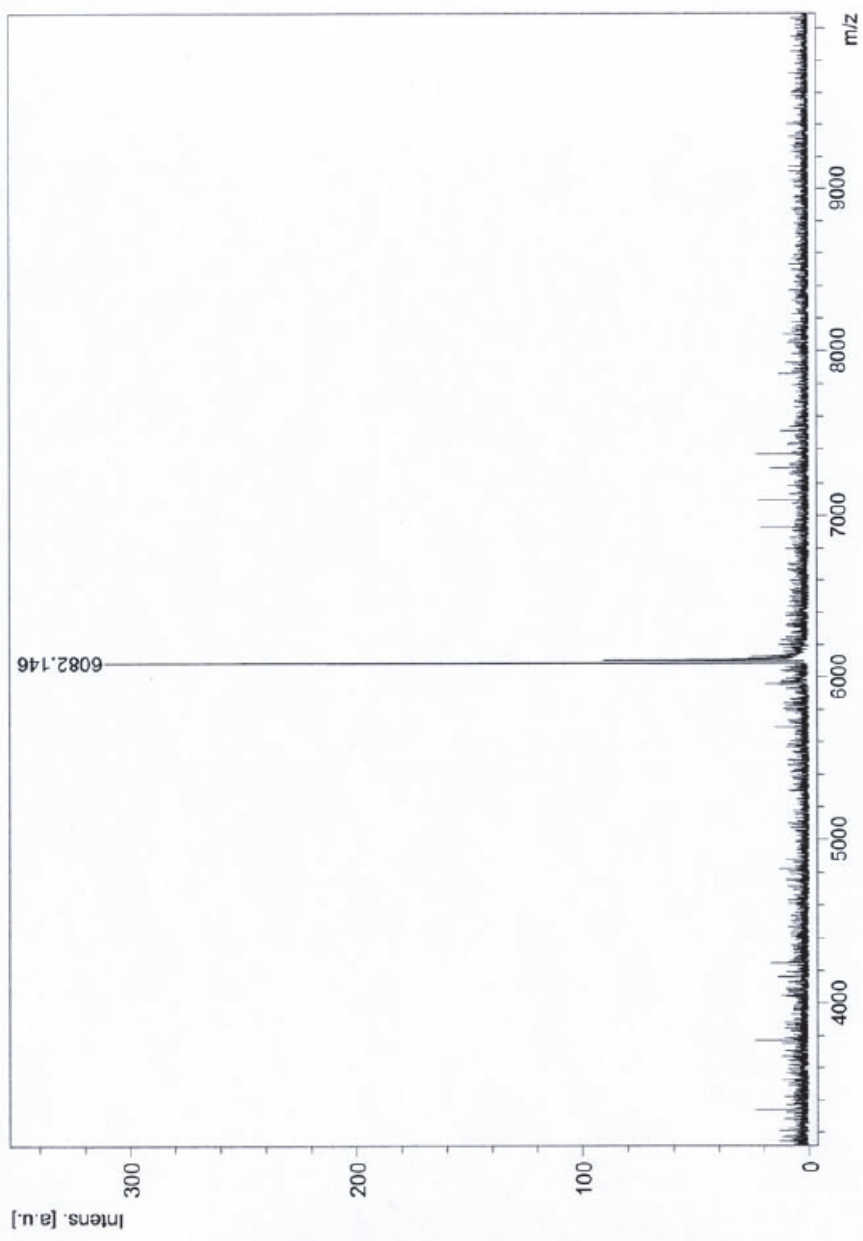

Figure SII.46 MALDI-TOF spectrum of AON21

D:\Data\Ake\110607\_Qing and Jyoti\_antisense\AON\_22\_10\10\_J7\1

Comment 1

Comment 2

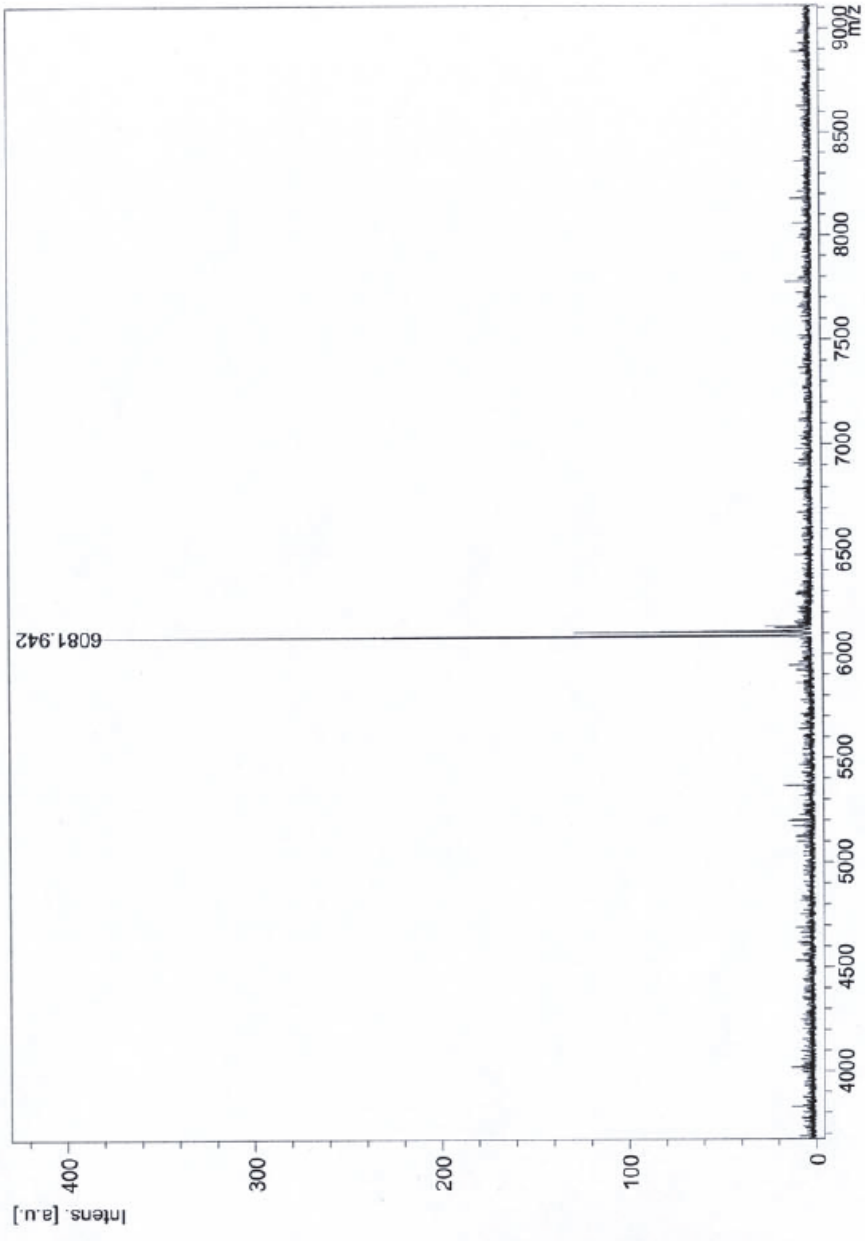

Figure SII.47 MALDI-TOF spectrum of AON22

D:\Data\Ake\110607\_Qing and Jyoti\_antisense\AON\_23\_10ul\0\_K511

Comment 1

Comment 2

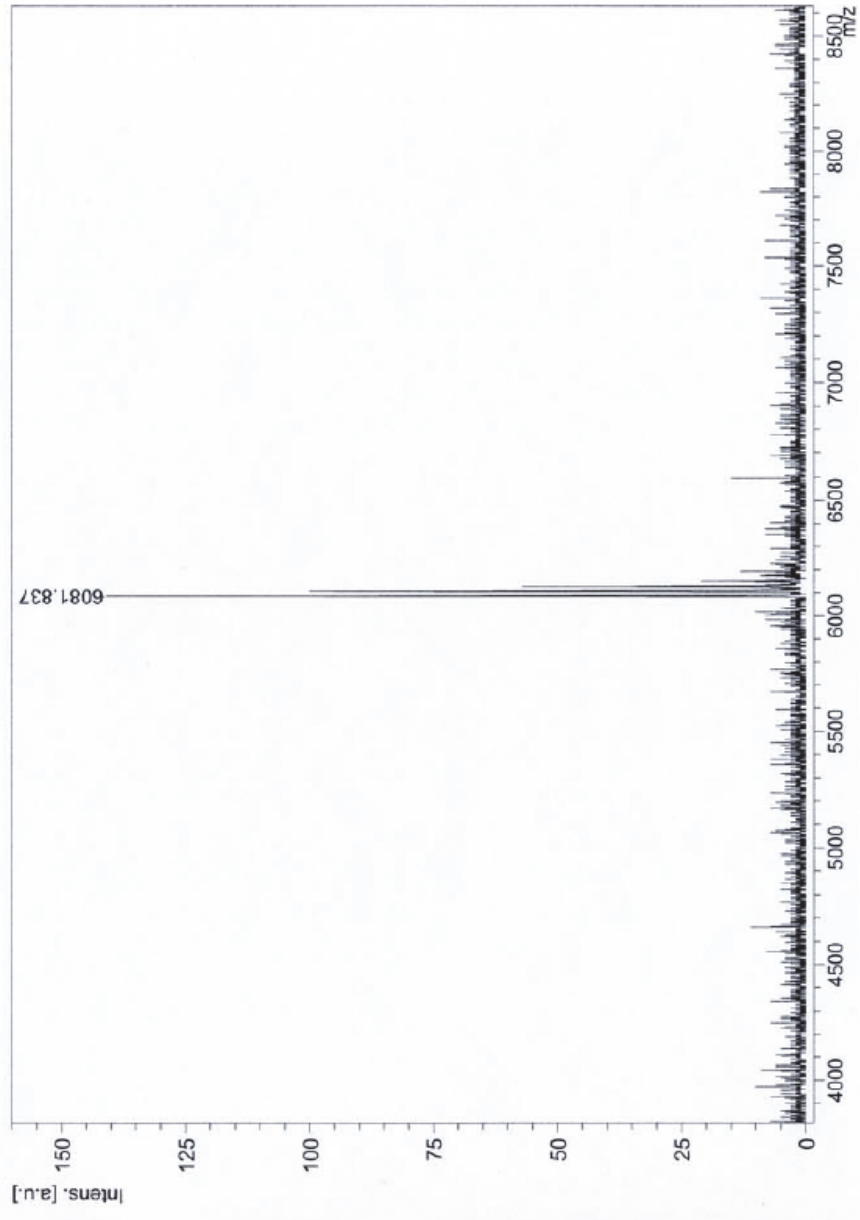

Figure SII.48 MALDI-TOF spectrum of AON23

D:\Data\Ake\110607\_Qing and Jyoti\_antisense\AON\_24\_50ul\0\_1711

Comment 1

Comment 2

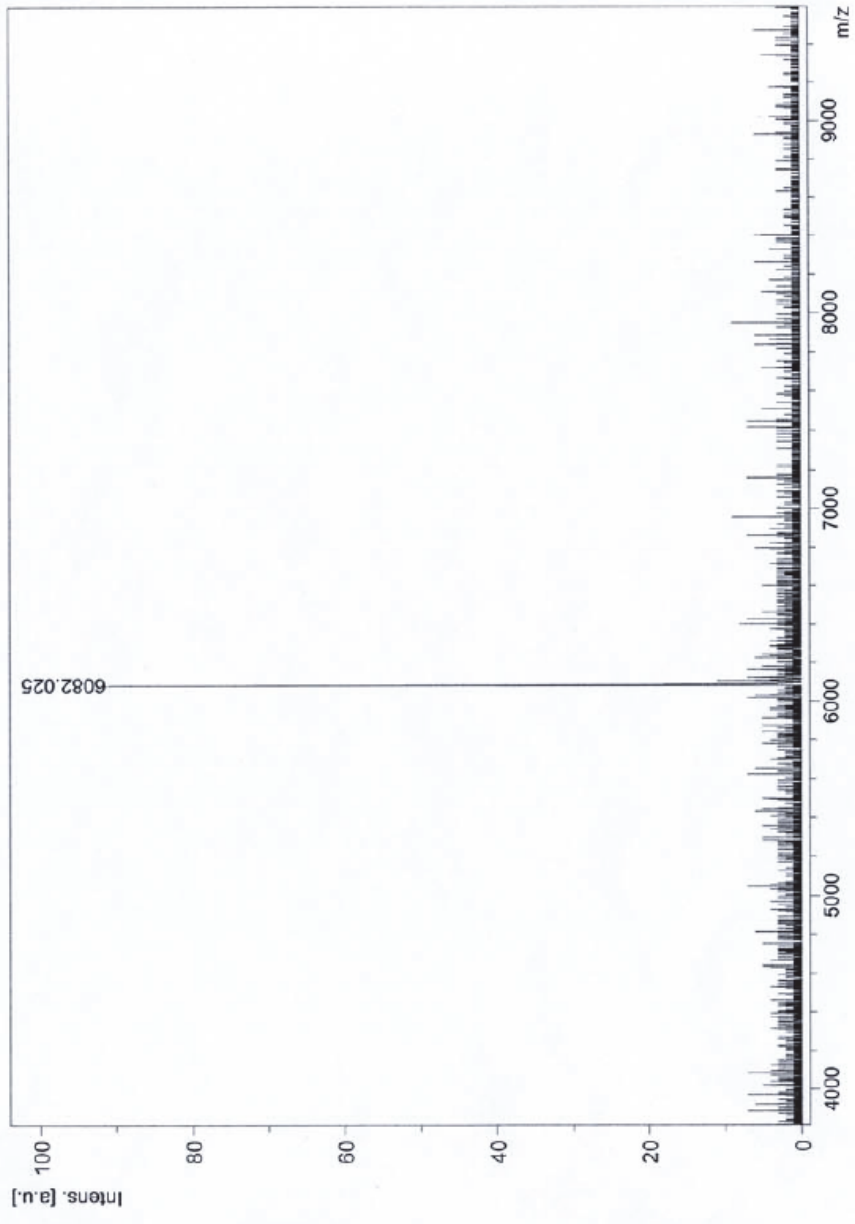

Figure SII.49 MALDI-TOF spectrum of AON24

D:\Data\Ake\Jyoti\_qing\_110916\AON25\_100ul\0\_G1311

Comment 1  
Comment 2

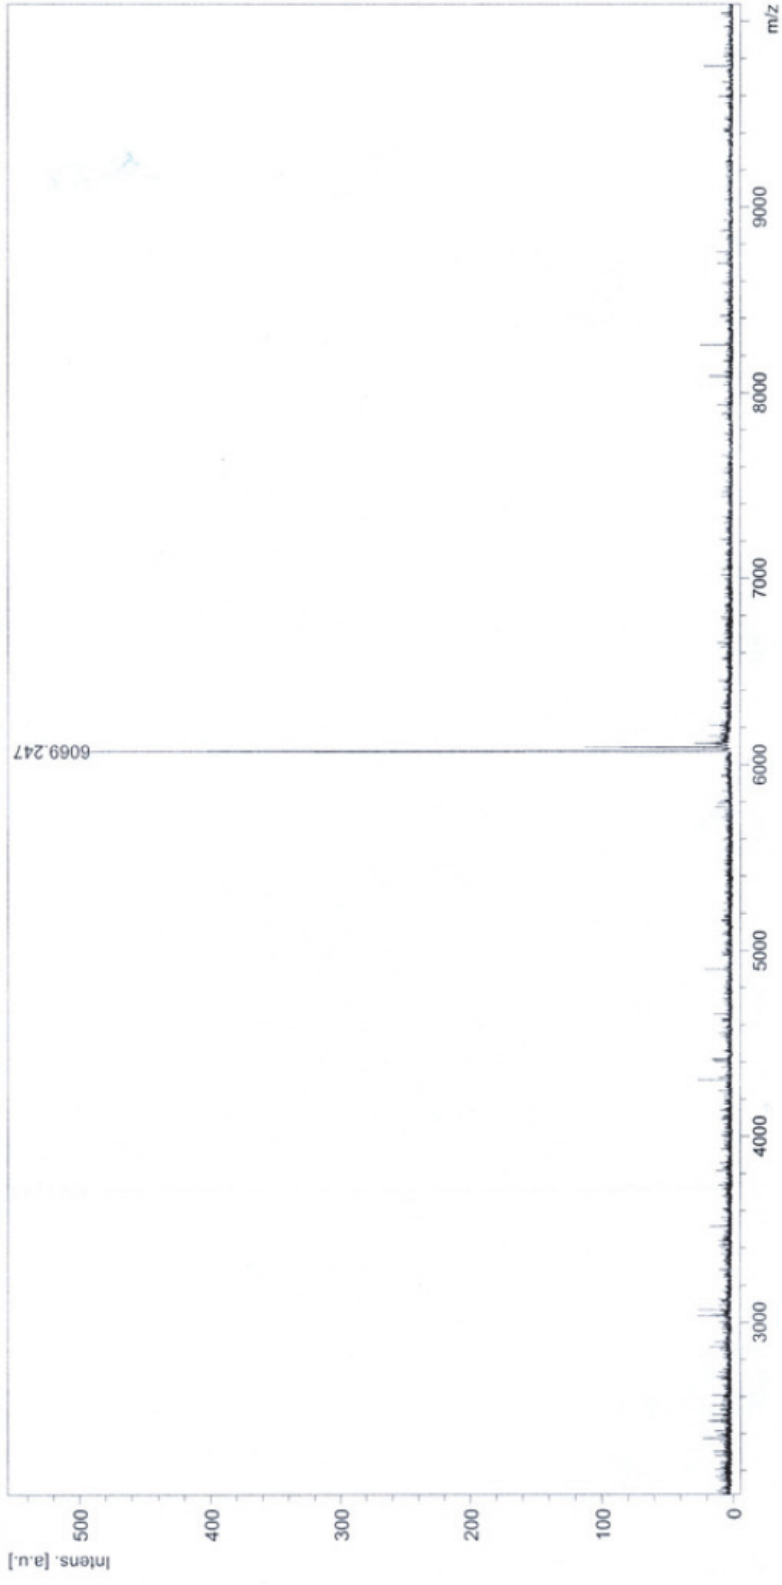

Figure S11.50 MALDI-TOF spectrum of AON28

D:\Data\Ake\Jyoti\_qing\_110916\AON26\_100ul\0\_H1111

Comment 1  
Comment 2

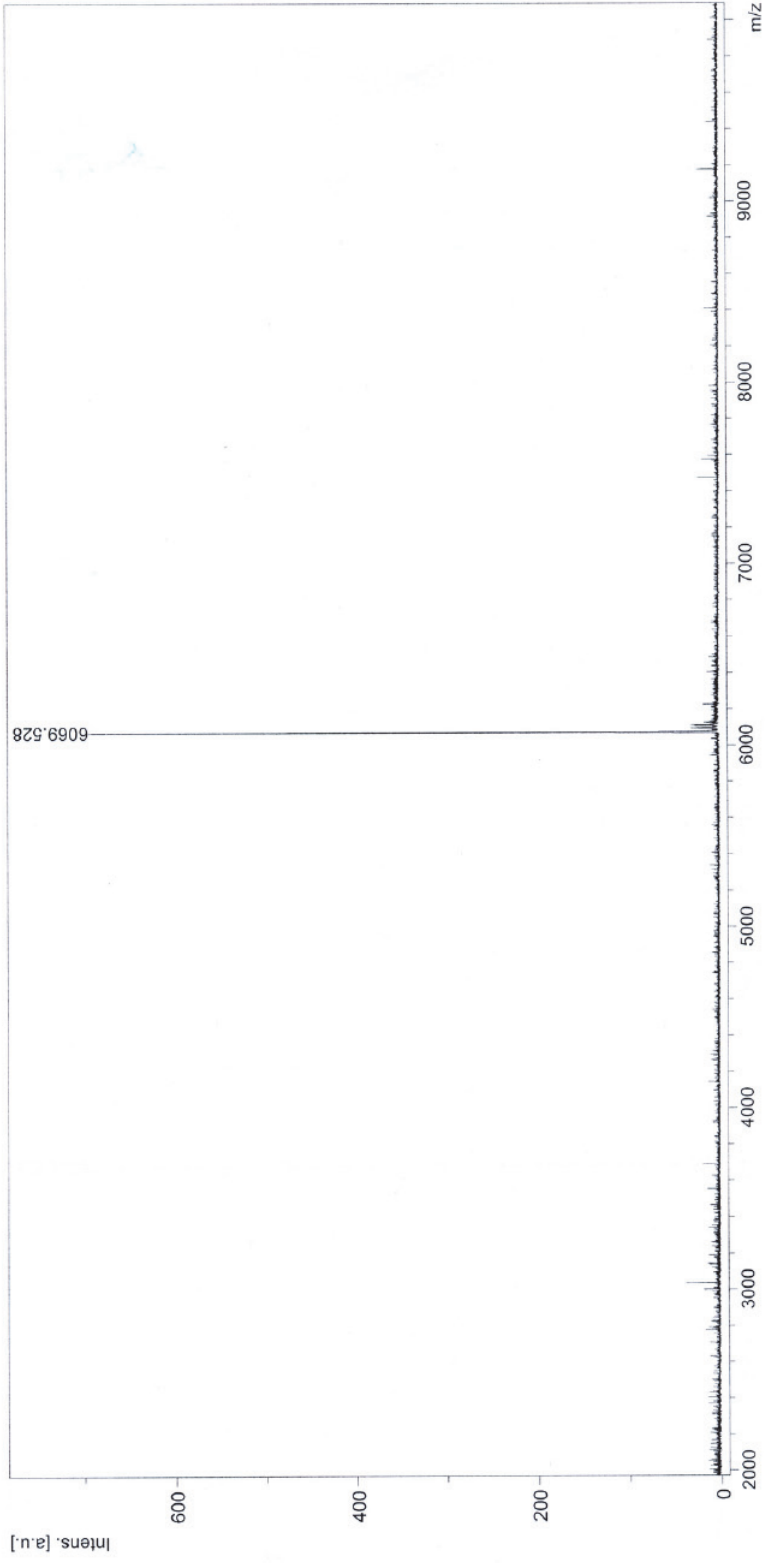

Figure SII.51 MALDI-TOF spectrum of AON29

D:\Data\AkelJyoti\_qing\_110916\AON27\_100ul\0\_H1211

Comment 1  
Comment 2

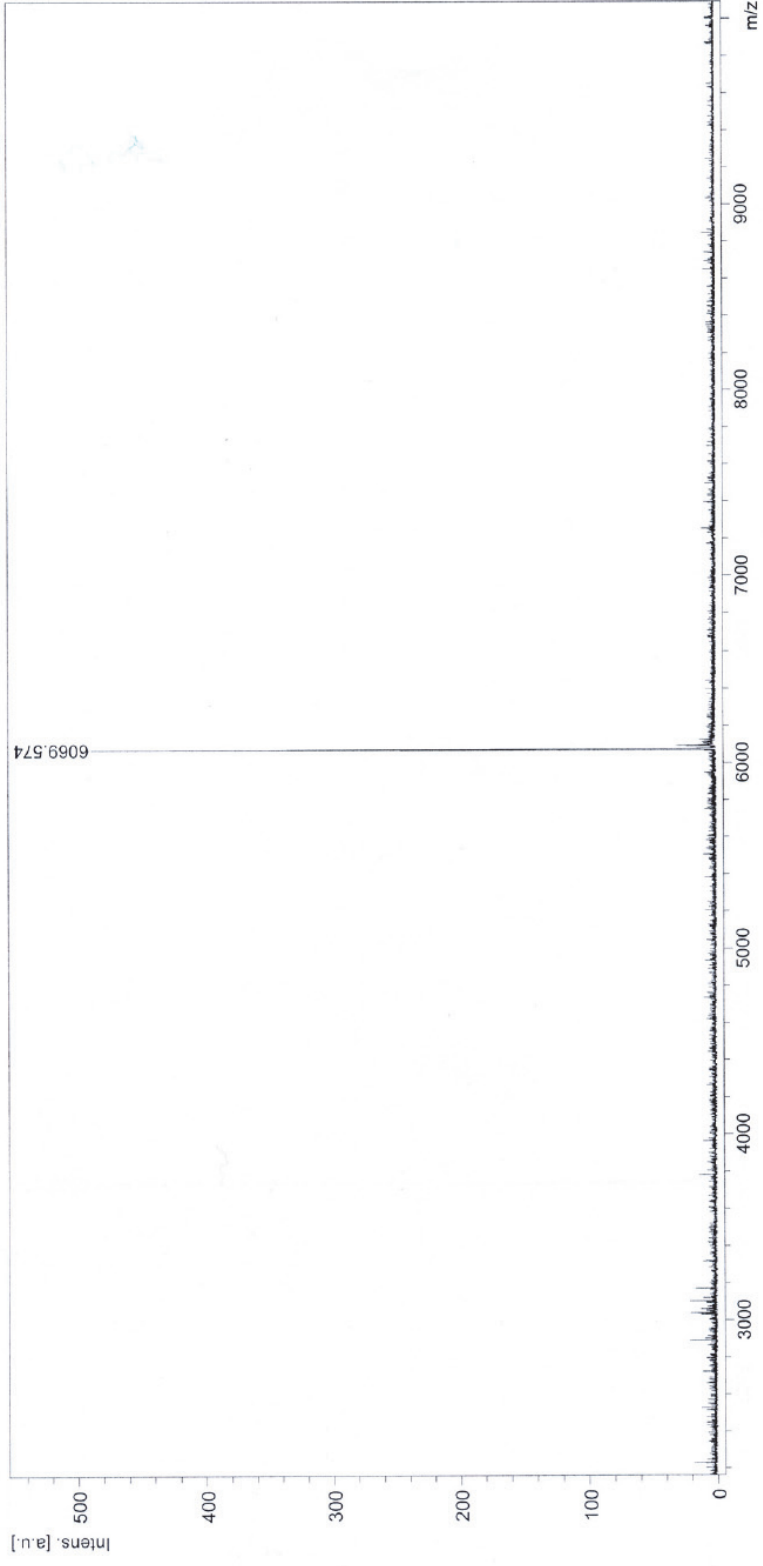

Figure SII.52 MALDI-TOF spectrum of AON30



D:\Data\Ake\Jyoti\_qing\_110916\AON28\_100ul\0\_H1311

Comment 1  
Comment 2

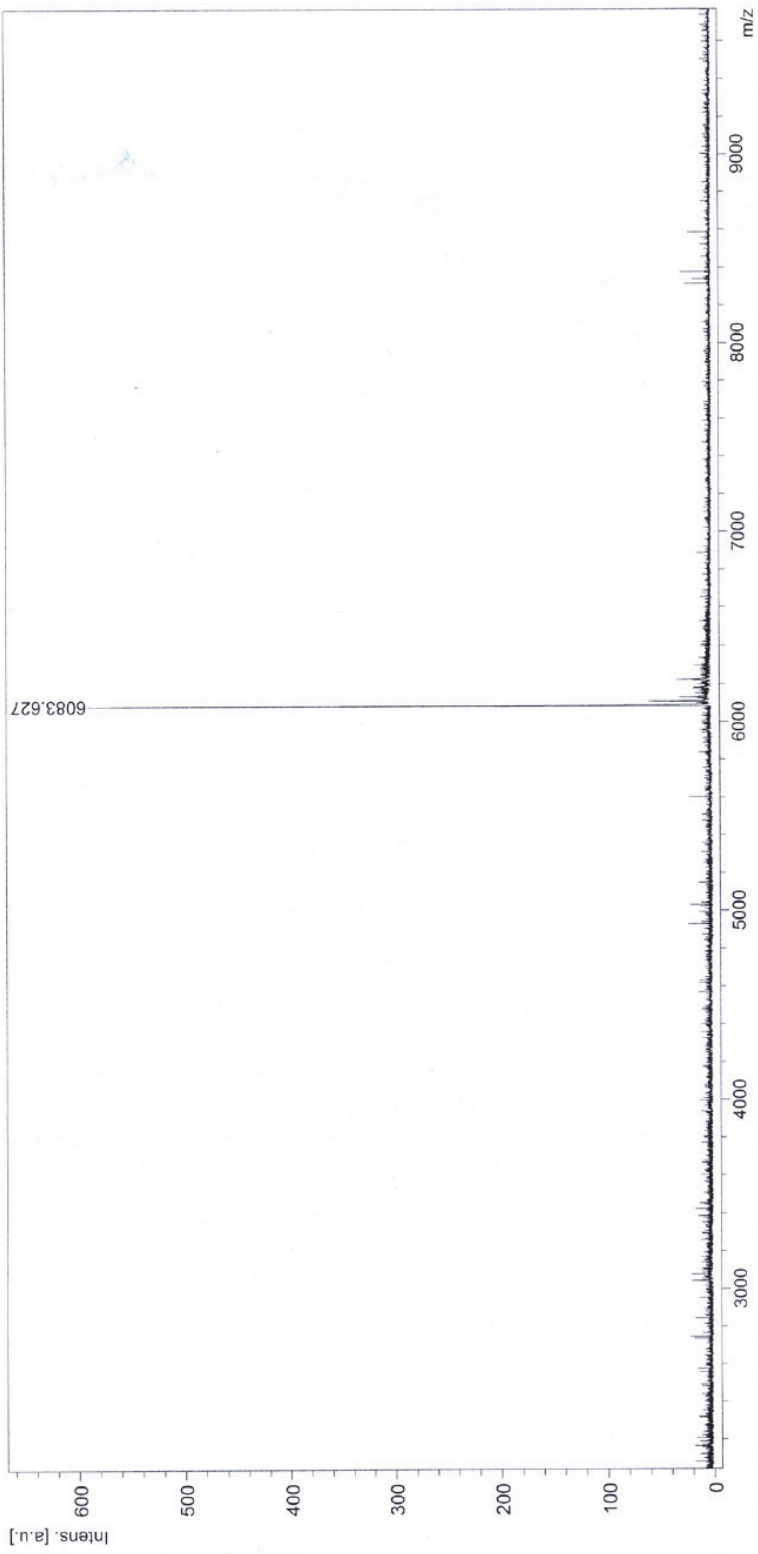

Figure SII.53 MALDI-TOF spectrum of AON31

D:\Data\Ake\Jyoti\_qing\_110916\AON29\_100ul\0\_1111

Comment 1  
Comment 2

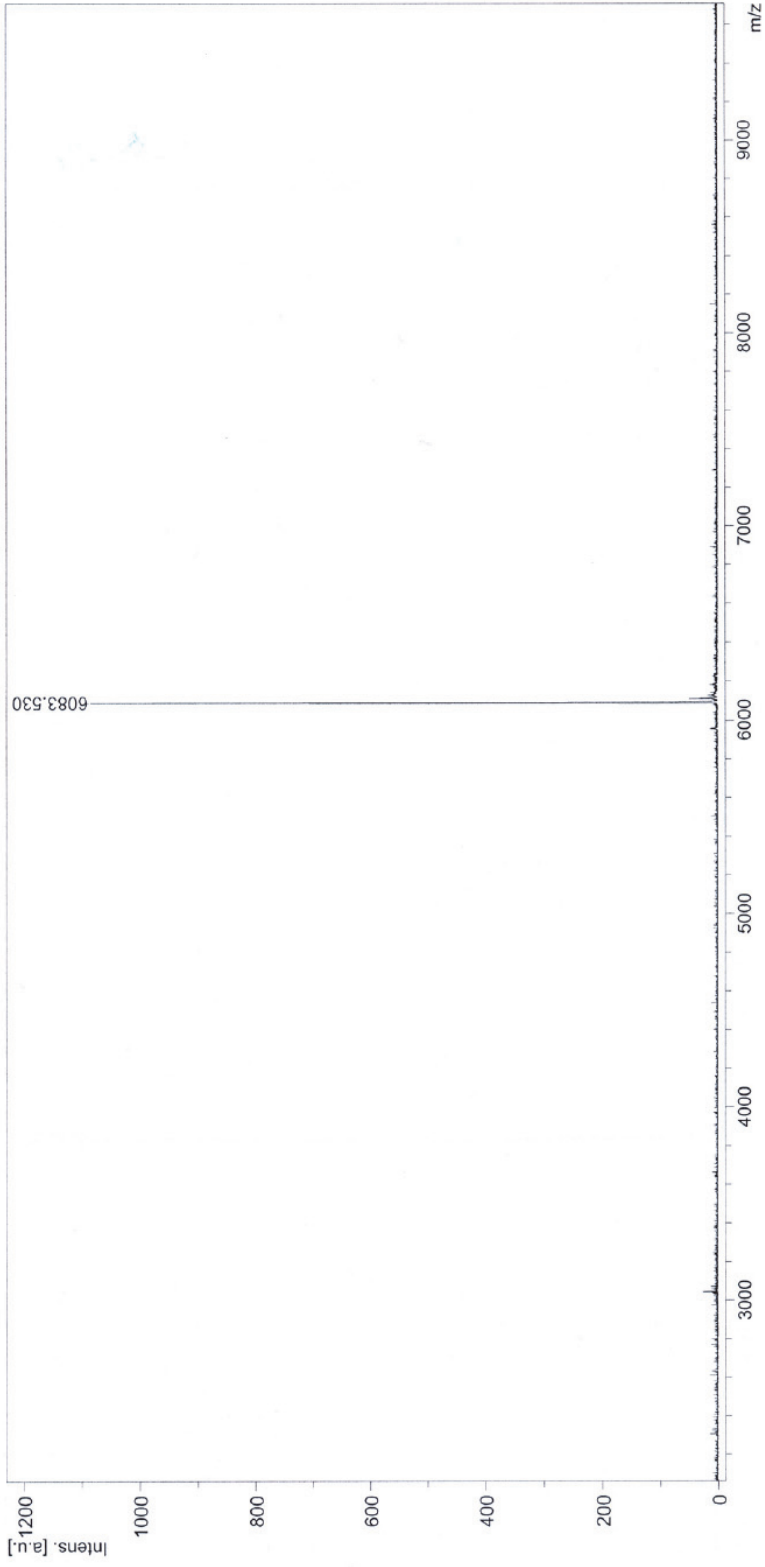

Figure SII.54 MALDI-TOF spectrum of AON32

D:\Data\Ake\Jyoti\_qing\_110916\AON30\_100ul\0\_I1211

Comment 1  
Comment 2

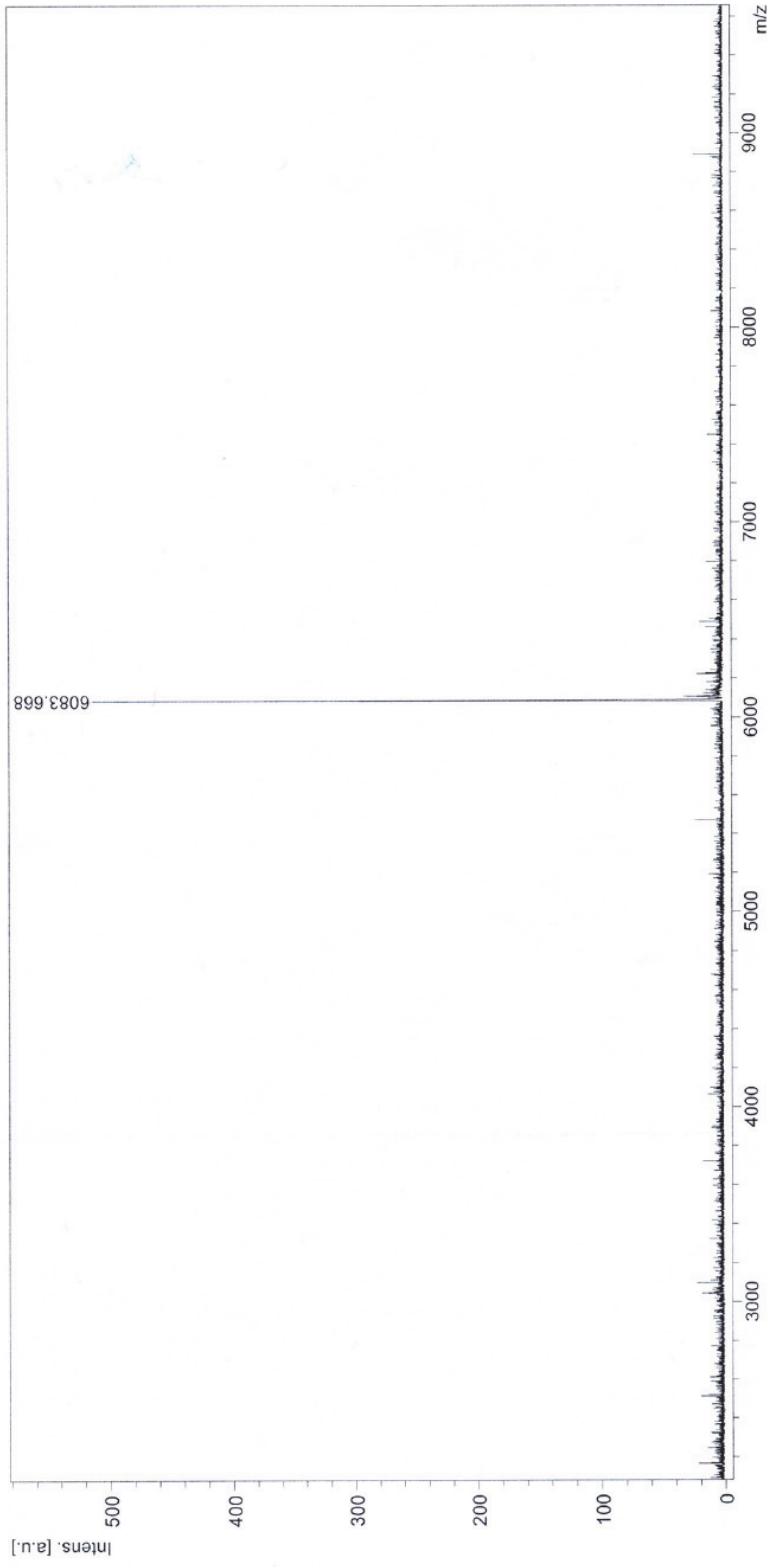

Figure SII.55 MALDI-TOF spectrum of AON33

D:\Data\Ake\Jyoti\_qing\_110916\AON31\_100ul\0\_1131

Comment 1  
Comment 2

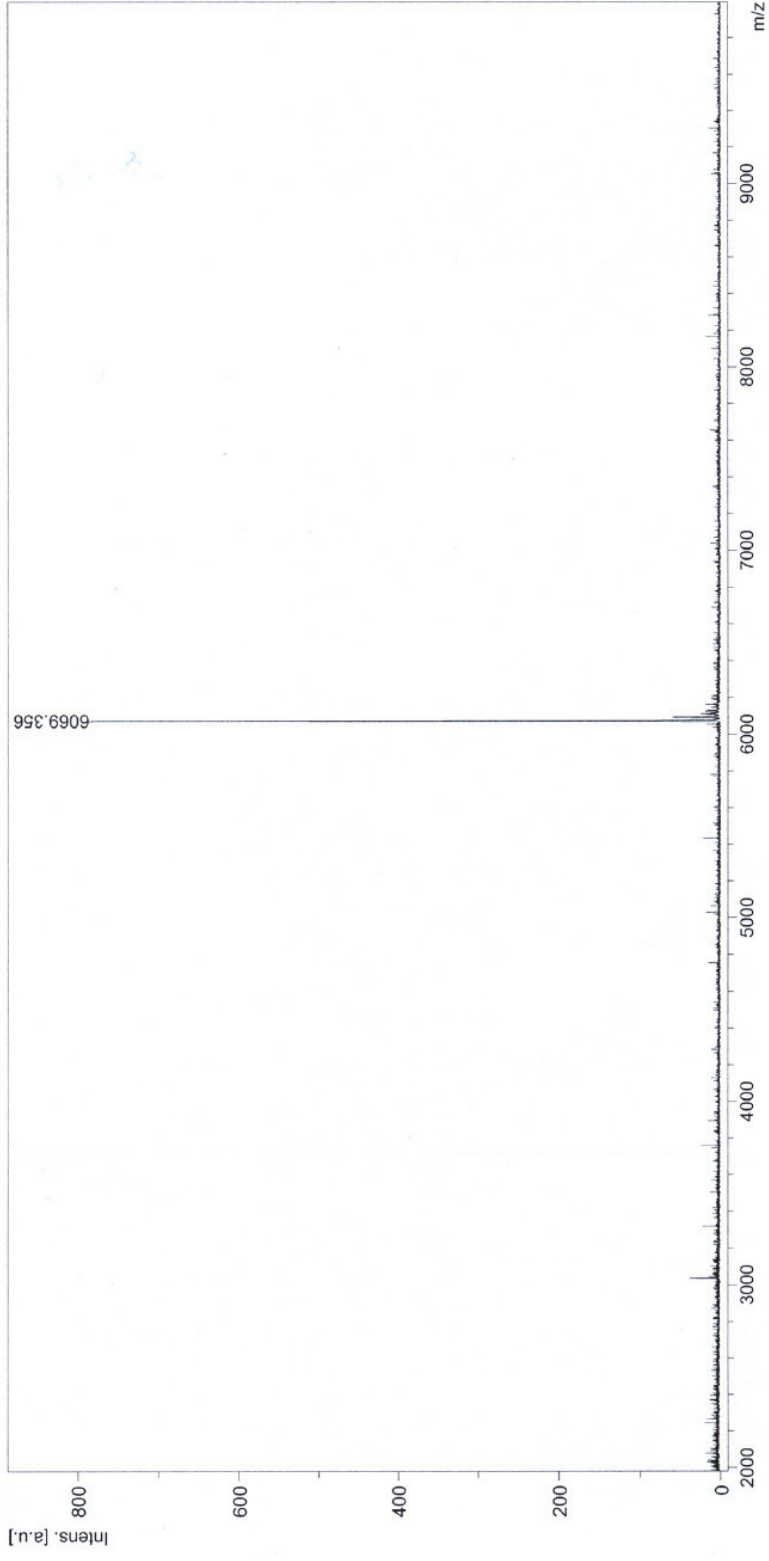

Figure SII.56 MALDI-TOF spectrum of AON34

D:\Data\Ake\Jyoti\_qing\_110916\AON32\_100ul\0\_J1111

Comment 1

Comment 2

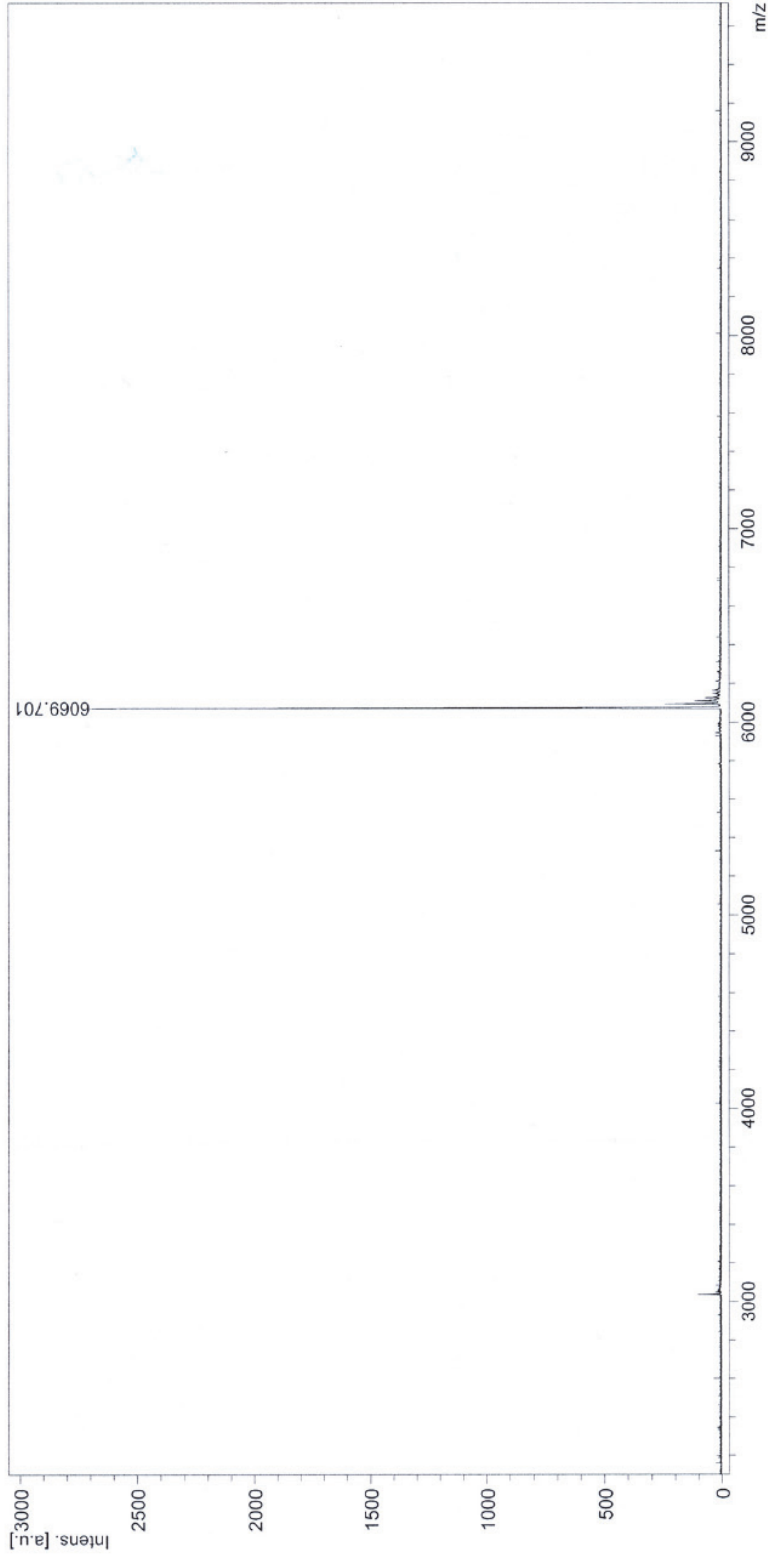

Figure SII.57 MALDI-TOF spectrum of AON35



D:\Data\Ake\Jyoti\_qing\_110916\AON33\_100ul10\_J1211

Comment 1

Comment 2

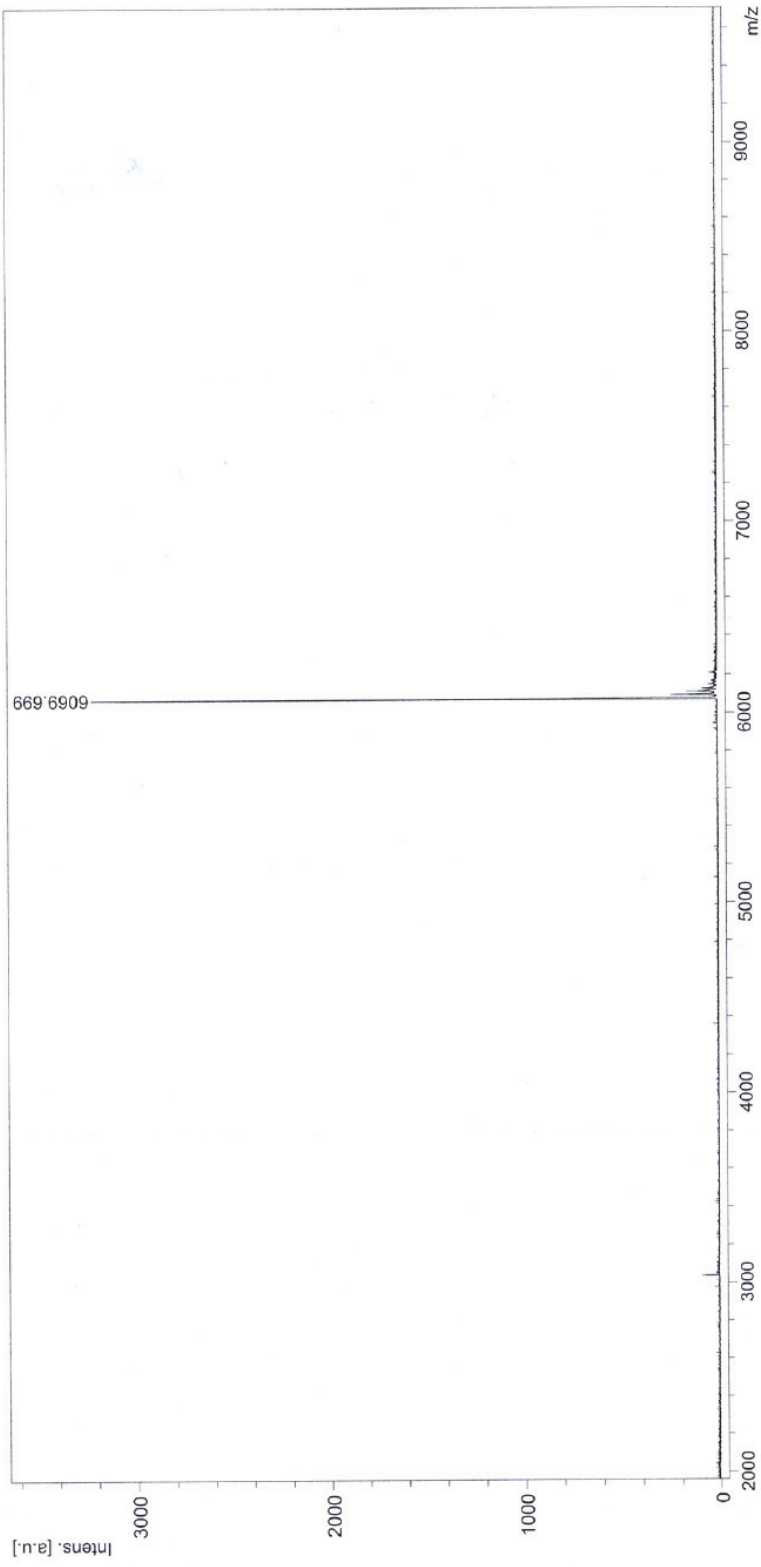

Figure SII.58 MALDI-TOF spectrum of AON36

D:\Data\Ake\Jyoti\_qing\_110916\AON34\_100u\10\_J1311

Comment 1

Comment 2

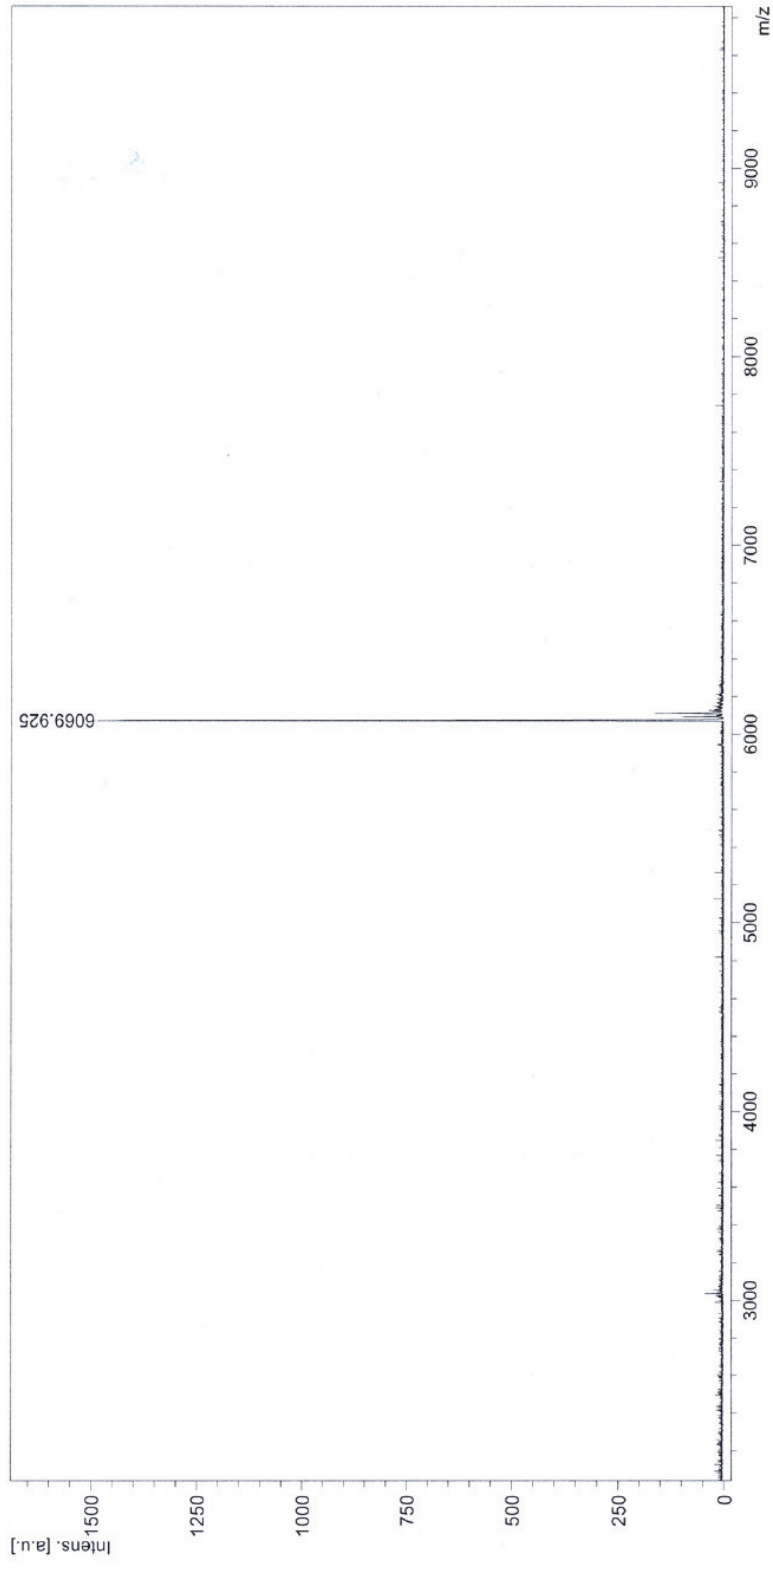

Figure SII.59 MALDI-TOF spectrum of AON25

D:\Data\AkeJyoti\_qing\_110916\AON35\_100ul\0\_K1111

Comment 1

Comment 2

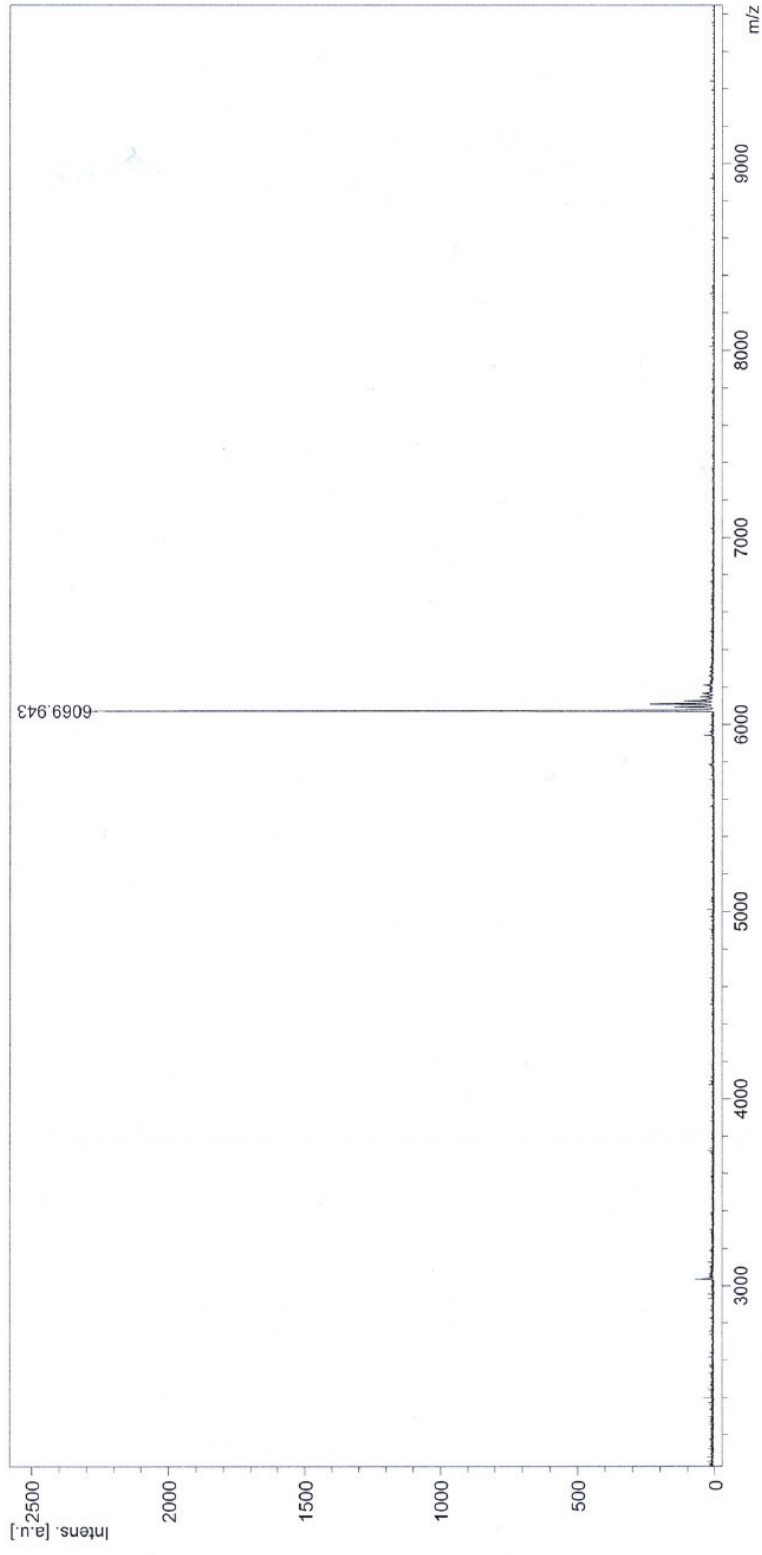

Figure SII.60 MALDI-TOF spectrum of AON26

D:\Data\Ake\Jyoti\_qing\_110916\AON36\_100ul\10\_K12\1

Comment 1

Comment 2

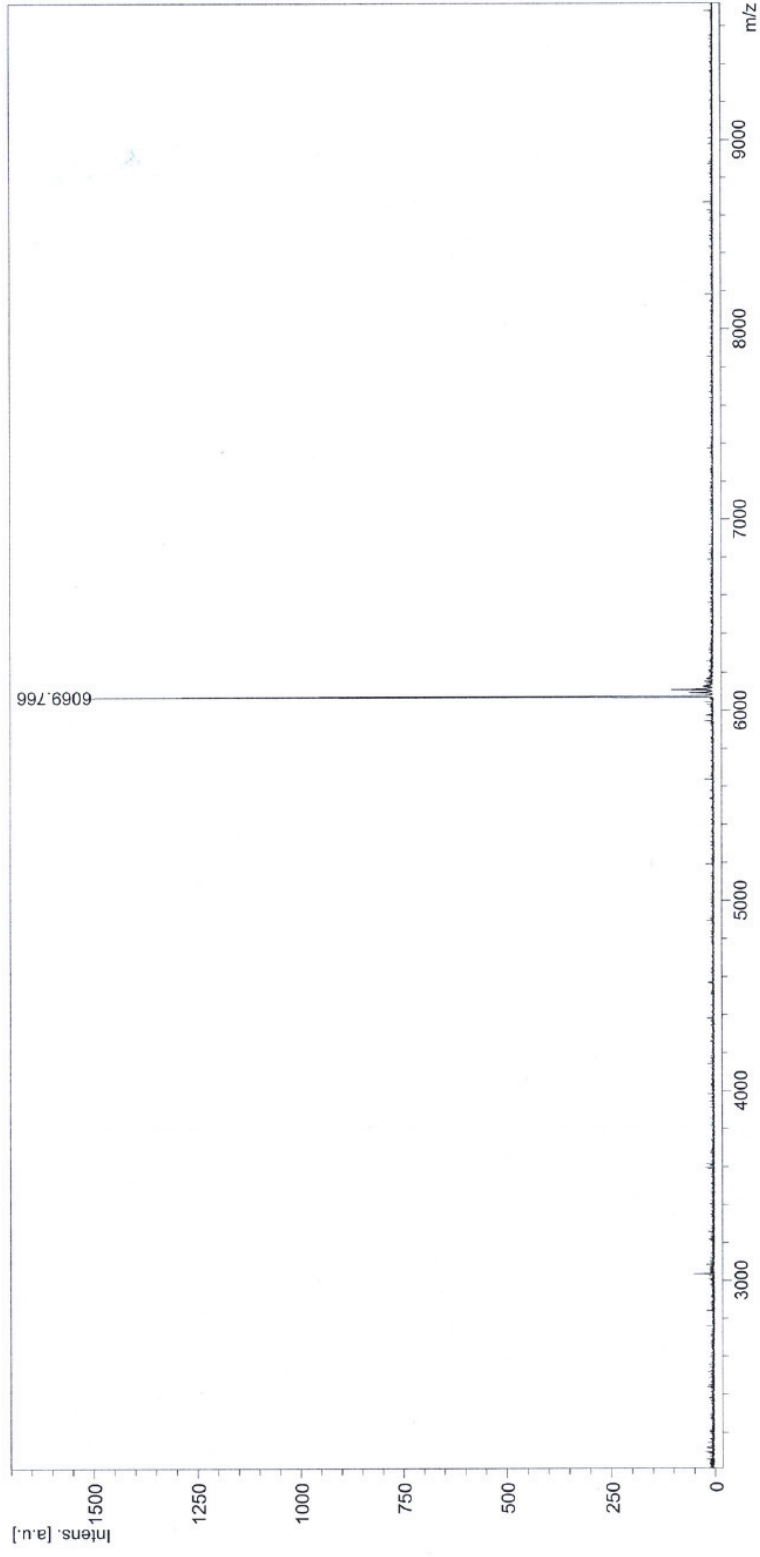

Figure SII.61 MALDI-TOF spectrum of AON27

**Table SIII.1.** Extend of *E. coli* RNase HI promoted cleavage at 60 minutes of the AON/RNA hybrid duplexes shown as products proportion (%). Cells marked in blue highlight the extend of the cleavage for 6 nt sites (modification protected sequence) from position of modification in 5'-direction of AON. Cells marked in red highlight major changes occurring outside of modification protected sequence.

|                                       | AON sequence  | Target RNA             | 5'-r | A   | A   | U   | G   | C   | A   | U   | G    | U   | C   |   |
|---------------------------------------|---------------|------------------------|------|-----|-----|-----|-----|-----|-----|-----|------|-----|-----|---|
|                                       |               |                        |      |     |     |     |     |     |     |     |      |     |     | 1 |
| Modification                          |               | Product proportion (%) |      |     |     |     |     |     |     |     |      |     |     |   |
| 3'd (TT ACG TAC AGT GTC CGC CCT)-5'   |               | Native                 |      | 0.2 | 0.0 | 0.3 | 1.0 | 1.0 | 2.3 | 1.4 | 12.9 | 2.2 | 4.2 |   |
| 3'd (TT A3CG TAC AGT GTC CGC CCT)-5'  | 7'R-Me-cLNA-A | AON1                   |      | 0.6 | 0.3 | 0.5 | 1.3 | 1.4 | 3.0 | 1.2 | 1.7  | 2.0 | 6.2 |   |
|                                       | 7'S-cLNA-A    | AON4                   |      | 0.8 | 0.6 | 0.5 | 1.1 | 1.1 | 2.0 | 1.0 | 1.2  | 1.8 | 5.4 |   |
|                                       | LNA-A         | AON25                  |      | 1.2 | 0.3 | 0.4 | 1.0 | 2.7 | 1.8 | 1.1 | 2.1  | 1.7 | 4.1 |   |
| 3'd (TT ACG TA7C AGT GTC CGC CCT)-5'  | 7'R-cLNA-A    | AON2                   |      | 0.0 | 0.0 | 0.0 | 0.0 | 0.0 | 1.0 | 0.2 | 2.0  | 1.3 | 2.8 |   |
|                                       | 7'S-cLNA-A    | AON5                   |      | 0.8 | 0.6 | 0.6 | 0.9 | 1.1 | 2.1 | 0.9 | 3.0  | 1.7 | 3.6 |   |
|                                       | LNA-A         | AON26                  |      | 0.5 | 0.0 | 0.1 | 0.4 | 0.8 | 2.2 | 0.5 | 4.2  | 1.0 | 3.1 |   |
| 3'd (TT ACG TAC A9GT GTC CGC CCT)-5'  | 7'R-cLNA-A    | AON3                   |      | 1.0 | 0.6 | 1.3 | 0.7 | 1.0 | 3.1 | 2.4 | 30.4 | 3.5 | 2.9 |   |
|                                       | 7'S-cLNA-A    | AON6                   |      | 1.4 | 0.7 | 1.6 | 0.8 | 1.0 | 3.0 | 2.8 | 32.7 | 4.5 | 3.1 |   |
|                                       | LNA-A         | AON27                  |      | 0.2 | 0.1 | 1.1 | 0.4 | 0.8 | 1.5 | 3.3 | 55.6 | 6.2 | 2.4 |   |
| 3'd (TT ACG5 TAC AGT GTC CGC CCT)-5'  | 7'R-cLNA-G    | AON7                   |      | 1.5 | 0.8 | 0.6 | 1.2 | 1.1 | 2.0 | 0.9 | 2.2  | 1.9 | 3.3 |   |
|                                       | 7'S-cLNA-G    | AON10                  |      | 0.9 | 0.4 | 0.5 | 1.2 | 1.0 | 2.3 | 0.8 | 1.7  | 1.8 | 3.9 |   |
|                                       | LNA-G         | AON28                  |      | 1.3 | 0.6 | 0.7 | 1.4 | 1.4 | 2.5 | 0.9 | 2.0  | 1.8 | 3.5 |   |
| 3'd (TT ACG TAC A10T GTC CGC CCT)-5'  | 7'R-cLNA-G    | AON8                   |      | 1.2 | 0.6 | 1.4 | 0.8 | 1.0 | 1.9 | 3.7 | 45.5 | 4.7 | 3.3 |   |
|                                       | 7'S-cLNA-G    | AON11                  |      | 0.7 | 0.4 | 1.1 | 0.6 | 0.8 | 1.4 | 3.8 | 45.0 | 3.0 | 3.1 |   |
|                                       | LNA-G         | AON29                  |      | 1.3 | 0.6 | 1.7 | 0.9 | 1.0 | 1.8 | 4.3 | 45.8 | 4.5 | 3.4 |   |
| 3'd (TT ACG TAC AGT GTC CG16C CCT)-5' | 7'R-cLNA-G    | AON9                   |      | 0.8 | 0.5 | 1.2 | 1.9 | 1.7 | 3.8 | 3.9 | 46.8 | 4.8 | 5.3 |   |
|                                       | 7'S-cLNA-G    | AON12                  |      | 0.7 | 0.5 | 1.4 | 2.2 | 2.2 | 4.1 | 5.2 | 61.9 | 4.7 | 2.7 |   |
|                                       | LNA-G         | AON30                  |      | 1.1 | 0.5 | 1.4 | 2.1 | 2.1 | 4.3 | 4.1 | 49.1 | 4.4 | 4.5 |   |









**Table SIII.2.** Average RNase H cleavage rate ( $\mu\text{M s}^{-1} \text{U}^{-1}$ ) during first 60 minutes normalized to 1 unit (U) of enzyme (1 U catalyzes the hydrolysis of 1 nmol of RNA in radiolabeled poly(A)-poly(dT) to acid-soluble material in 20 min at 37°C) of the RNase H promoted cleavage of the AON/RNA.

|                     | Position     | 1        | 2        | 3        | 4        | 5        | 6        | 7        | 8        | 9        | 10       |
|---------------------|--------------|----------|----------|----------|----------|----------|----------|----------|----------|----------|----------|
| <b>Modification</b> | <b>5'-r</b>  | <b>A</b> | <b>A</b> | <b>U</b> | <b>G</b> | <b>C</b> | <b>A</b> | <b>U</b> | <b>G</b> | <b>U</b> | <b>C</b> |
|                     | Native       | 0.0001   | 0.0000   | 0.0001   | 0.0003   | 0.0004   | 0.0008   | 0.0005   | 0.0045   | 0.0008   | 0.0015   |
| <b>7'R-cLNA-A</b>   | <b>AON1</b>  | 0.0002   | 0.0001   | 0.0002   | 0.0005   | 0.0005   | 0.0010   | 0.0004   | 0.0006   | 0.0007   | 0.0021   |
| <b>7'S-cLNA-A</b>   | <b>AON4</b>  | 0.0003   | 0.0002   | 0.0002   | 0.0004   | 0.0004   | 0.0007   | 0.0003   | 0.0004   | 0.0006   | 0.0019   |
| <b>LNA-A</b>        | <b>AON25</b> | 0.0004   | 0.0001   | 0.0001   | 0.0004   | 0.0009   | 0.0006   | 0.0004   | 0.0007   | 0.0006   | 0.0014   |
| <b>7'R-cLNA-A</b>   | <b>AON2</b>  | 0.0000   | 0.0000   | 0.0000   | 0.0000   | 0.0000   | 0.0003   | 0.0001   | 0.0007   | 0.0004   | 0.0010   |
| <b>7'S-cLNA-A</b>   | <b>AON5</b>  | 0.0003   | 0.0002   | 0.0002   | 0.0003   | 0.0004   | 0.0007   | 0.0003   | 0.0010   | 0.0006   | 0.0012   |
| <b>LNA-A</b>        | <b>AON26</b> | 0.0002   | 0.0000   | 0.0000   | 0.0001   | 0.0003   | 0.0007   | 0.0002   | 0.0014   | 0.0003   | 0.0011   |
| <b>7'R-cLNA-A</b>   | <b>AON3</b>  | 0.0004   | 0.0002   | 0.0004   | 0.0003   | 0.0003   | 0.0011   | 0.0008   | 0.0106   | 0.0012   | 0.0010   |
| <b>7'S-cLNA-A</b>   | <b>AON6</b>  | 0.0005   | 0.0002   | 0.0006   | 0.0003   | 0.0004   | 0.0010   | 0.0010   | 0.0114   | 0.0016   | 0.0011   |
| <b>LNA-A</b>        | <b>AON27</b> | 0.0001   | 0.0000   | 0.0004   | 0.0001   | 0.0003   | 0.0005   | 0.0012   | 0.0193   | 0.0021   | 0.0008   |
| <b>7'R-cLNA-G</b>   | <b>AON7</b>  | 0.0005   | 0.0003   | 0.0002   | 0.0004   | 0.0004   | 0.0007   | 0.0003   | 0.0007   | 0.0007   | 0.0012   |
| <b>7'S-cLNA-G</b>   | <b>AON10</b> | 0.0003   | 0.0002   | 0.0002   | 0.0004   | 0.0004   | 0.0008   | 0.0003   | 0.0006   | 0.0006   | 0.0013   |
| <b>LNA-G</b>        | <b>AON28</b> | 0.0004   | 0.0002   | 0.0002   | 0.0005   | 0.0005   | 0.0009   | 0.0003   | 0.0007   | 0.0006   | 0.0012   |
| <b>7'R-cLNA-G</b>   | <b>AON8</b>  | 0.0004   | 0.0002   | 0.0005   | 0.0003   | 0.0003   | 0.0007   | 0.0013   | 0.0158   | 0.0016   | 0.0012   |
| <b>7'S-cLNA-G</b>   | <b>AON11</b> | 0.0002   | 0.0001   | 0.0004   | 0.0002   | 0.0003   | 0.0005   | 0.0013   | 0.0156   | 0.0011   | 0.0011   |
| <b>LNA-G</b>        | <b>AON29</b> | 0.0005   | 0.0002   | 0.0006   | 0.0003   | 0.0003   | 0.0006   | 0.0015   | 0.0159   | 0.0016   | 0.0012   |
| <b>7'R-cLNA-G</b>   | <b>AON9</b>  | 0.0003   | 0.0002   | 0.0004   | 0.0007   | 0.0006   | 0.0013   | 0.0014   | 0.0162   | 0.0017   | 0.0019   |
| <b>7'S-cLNA-G</b>   | <b>AON12</b> | 0.0002   | 0.0002   | 0.0005   | 0.0008   | 0.0008   | 0.0014   | 0.0018   | 0.0215   | 0.0016   | 0.0009   |

Table SII.2 (continue)

|                     | Position    | 1        | 2        | 3        | 4        | 5        | 6        | 7        | 8        | 9        | 10       |
|---------------------|-------------|----------|----------|----------|----------|----------|----------|----------|----------|----------|----------|
| <b>Modification</b> | <b>5'-r</b> | <b>A</b> | <b>A</b> | <b>U</b> | <b>G</b> | <b>C</b> | <b>A</b> | <b>U</b> | <b>G</b> | <b>U</b> | <b>C</b> |
| LNA-G               | AON30       | 0.0004   | 0.0002   | 0.0005   | 0.0007   | 0.0007   | 0.0015   | 0.0014   | 0.0170   | 0.0015   | 0.0016   |
| 7'R-cLNA-C          | AON13       | 0.0003   | 0.0001   | 0.0001   | 0.0003   | 0.0003   | 0.0006   | 0.0003   | 0.0003   | 0.0005   | 0.0011   |
| 7'S-cLNA-C          | AON16       | 0.0003   | 0.0002   | 0.0002   | 0.0004   | 0.0004   | 0.0006   | 0.0004   | 0.0005   | 0.0007   | 0.0015   |
| LNA-C               | AON31       | 0.0004   | 0.0002   | 0.0002   | 0.0005   | 0.0005   | 0.0008   | 0.0003   | 0.0004   | 0.0006   | 0.0011   |
| 7'R-cLNA-C          | AON14       | 0.0003   | 0.0001   | 0.0002   | 0.0002   | 0.0003   | 0.0008   | 0.0004   | 0.0023   | 0.0008   | 0.0009   |
| 7'S-cLNA-C          | AON17       | 0.0003   | 0.0002   | 0.0002   | 0.0003   | 0.0003   | 0.0013   | 0.0006   | 0.0038   | 0.0011   | 0.0012   |
| LNA-C               | AON32       | 0.0005   | 0.0002   | 0.0003   | 0.0002   | 0.0003   | 0.0012   | 0.0005   | 0.0038   | 0.0006   | 0.0010   |
| 7'R-cLNA-C          | AON15       | 0.0003   | 0.0002   | 0.0003   | 0.0005   | 0.0005   | 0.0009   | 0.0012   | 0.0116   | 0.0015   | 0.0017   |
| 7'S-cLNA-C          | AON18       | 0.0004   | 0.0002   | 0.0004   | 0.0007   | 0.0006   | 0.0013   | 0.0017   | 0.0175   | 0.0017   | 0.0018   |
| LNA-C               | AON33       | 0.0002   | 0.0001   | 0.0003   | 0.0007   | 0.0006   | 0.0013   | 0.0012   | 0.0140   | 0.0015   | 0.0016   |
| 7'R-cLNA-T          | AON19       | 0.0001   | 0.0002   | 0.0002   | 0.0003   | 0.0003   | 0.0007   | 0.0003   | 0.0010   | 0.0008   | 0.0014   |
| 7'S-cLNA-T          | AON22       | 0.0002   | 0.0002   | 0.0001   | 0.0004   | 0.0004   | 0.0007   | 0.0003   | 0.0005   | 0.0008   | 0.0012   |
| LNA-T               | AON34       | 0.0003   | 0.0001   | 0.0001   | 0.0003   | 0.0004   | 0.0006   | 0.0002   | 0.0005   | 0.0005   | 0.0011   |
| 7'R-cLNA-T          | AON20       | 0.0001   | 0.0002   | 0.0004   | 0.0002   | 0.0003   | 0.0006   | 0.0017   | 0.0174   | 0.0019   | 0.0016   |
| 7'S-cLNA-T          | AON23       | 0.0002   | 0.0002   | 0.0004   | 0.0003   | 0.0004   | 0.0010   | 0.0017   | 0.0136   | 0.0017   | 0.0018   |
| LNA-T               | AON35       | 0.0003   | 0.0001   | 0.0003   | 0.0002   | 0.0002   | 0.0005   | 0.0016   | 0.0149   | 0.0012   | 0.0014   |
| 7'R-cLNA-T          | AON21       | 0.0003   | 0.0002   | 0.0004   | 0.0012   | 0.0003   | 0.0008   | 0.0017   | 0.0159   | 0.0020   | 0.0019   |
| 7'S-cLNA-T          | AON24       | 0.0002   | 0.0002   | 0.0004   | 0.0013   | 0.0005   | 0.0009   | 0.0019   | 0.0150   | 0.0020   | 0.0017   |
| LNA-T               | AON36       | 0.0003   | 0.0001   | 0.0005   | 0.0014   | 0.0005   | 0.0004   | 0.0015   | 0.0172   | 0.0013   | 0.0015   |

Table SIII.2 (continue)

|                     | Position |             | 11     | 12     | 13     | 14     | 15     | 16     | 17     | 18     | 19     | 20     |
|---------------------|----------|-------------|--------|--------|--------|--------|--------|--------|--------|--------|--------|--------|
| <b>Modification</b> |          | <b>5'-r</b> |        |        |        |        |        |        |        |        |        |        |
|                     | Native   |             | 0.0027 | 0.0006 | 0.0021 | 0.0014 | 0.0060 | 0.0012 | 0.0008 | 0.0010 | 0.0013 | 0.0088 |
| <i>7'R-cLNA-A</i>   | AON1     |             | 0.0043 | 0.0009 | 0.0019 | 0.0015 | 0.0062 | 0.0013 | 0.0010 | 0.0011 | 0.0013 | 0.0088 |
| <i>7'S-cLNA-A</i>   | AON4     |             | 0.0031 | 0.0009 | 0.0016 | 0.0014 | 0.0059 | 0.0012 | 0.0009 | 0.0011 | 0.0014 | 0.0118 |
| <b>LNA-A</b>        | AON25    |             | 0.0036 | 0.0013 | 0.0016 | 0.0015 | 0.0057 | 0.0014 | 0.0010 | 0.0011 | 0.0016 | 0.0103 |
| <i>7'R-cLNA-A</i>   | AON2     |             | 0.0009 | 0.0006 | 0.0010 | 0.0019 | 0.0104 | 0.0015 | 0.0011 | 0.0012 | 0.0015 | 0.0123 |
| <i>7'S-cLNA-A</i>   | AON5     |             | 0.0007 | 0.0008 | 0.0011 | 0.0019 | 0.0071 | 0.0013 | 0.0010 | 0.0012 | 0.0017 | 0.0126 |
| <b>LNA-A</b>        | AON26    |             | 0.0008 | 0.0006 | 0.0011 | 0.0021 | 0.0091 | 0.0018 | 0.0010 | 0.0012 | 0.0015 | 0.0112 |
| <i>7'R-cLNA-A</i>   | AON3     |             | 0.0006 | 0.0005 | 0.0006 | 0.0009 | 0.0037 | 0.0016 | 0.0014 | 0.0011 | 0.0012 | 0.0066 |
| <i>7'S-cLNA-A</i>   | AON6     |             | 0.0006 | 0.0005 | 0.0006 | 0.0008 | 0.0040 | 0.0017 | 0.0014 | 0.0011 | 0.0010 | 0.0050 |
| <b>LNA-A</b>        | AON27    |             | 0.0005 | 0.0003 | 0.0004 | 0.0006 | 0.0023 | 0.0018 | 0.0014 | 0.0007 | 0.0007 | 0.0010 |
| <i>7'R-cLNA-G</i>   | AON7     |             | 0.0012 | 0.0009 | 0.0017 | 0.0015 | 0.0061 | 0.0015 | 0.0012 | 0.0013 | 0.0016 | 0.0124 |
| <i>7'S-cLNA-G</i>   | AON10    |             | 0.0012 | 0.0008 | 0.0017 | 0.0016 | 0.0075 | 0.0015 | 0.0009 | 0.0011 | 0.0014 | 0.0120 |
| <b>LNA-G</b>        | AON28    |             | 0.0012 | 0.0007 | 0.0019 | 0.0017 | 0.0075 | 0.0013 | 0.0010 | 0.0011 | 0.0012 | 0.0116 |
| <i>7'R-cLNA-G</i>   | AON8     |             | 0.0024 | 0.0006 | 0.0006 | 0.0006 | 0.0017 | 0.0009 | 0.0012 | 0.0010 | 0.0010 | 0.0023 |
| <i>7'S-cLNA-G</i>   | AON11    |             | 0.0040 | 0.0005 | 0.0005 | 0.0005 | 0.0019 | 0.0006 | 0.0008 | 0.0006 | 0.0007 | 0.0040 |
| <b>LNA-G</b>        | AON29    |             | 0.0021 | 0.0005 | 0.0005 | 0.0007 | 0.0018 | 0.0007 | 0.0011 | 0.0009 | 0.0009 | 0.0029 |
| <i>7'R-cLNA-G</i>   | AON9     |             | 0.0031 | 0.0008 | 0.0014 | 0.0008 | 0.0018 | 0.0006 | 0.0003 | 0.0003 | 0.0003 | 0.0008 |
| <i>7'S-cLNA-G</i>   | AON12    |             | 0.0009 | 0.0007 | 0.0007 | 0.0006 | 0.0007 | 0.0005 | 0.0003 | 0.0002 | 0.0002 | 0.0003 |

|                     | Position    | 11       | 12       | 13       | 14       | 15       | 16       | 17       | 18       | 19       | 20       |
|---------------------|-------------|----------|----------|----------|----------|----------|----------|----------|----------|----------|----------|
| <b>Modification</b> | <b>5'-r</b> | <b>A</b> | <b>C</b> | <b>A</b> | <b>G</b> | <b>G</b> | <b>C</b> | <b>G</b> | <b>G</b> | <b>G</b> | <b>A</b> |
| LNA-G               | AON30       | 0.0031   | 0.0006   | 0.0013   | 0.0006   | 0.0018   | 0.0005   | 0.0003   | 0.0002   | 0.0003   | 0.0006   |
| 7'R-cLNA-C          | AON13       | 0.0031   | 0.0013   | 0.0022   | 0.0018   | 0.0070   | 0.0016   | 0.0010   | 0.0010   | 0.0013   | 0.0105   |
| 7'S-cLNA-C          | AON16       | 0.0039   | 0.0015   | 0.0028   | 0.0022   | 0.0071   | 0.0015   | 0.0010   | 0.0010   | 0.0013   | 0.0075   |
| LNA-C               | AON31       | 0.0029   | 0.0007   | 0.0023   | 0.0014   | 0.0074   | 0.0011   | 0.0008   | 0.0010   | 0.0012   | 0.0109   |
| 7'R-cLNA-C          | AON14       | 0.0009   | 0.0007   | 0.0008   | 0.0013   | 0.0086   | 0.0023   | 0.0013   | 0.0012   | 0.0013   | 0.0100   |
| 7'S-cLNA-C          | AON17       | 0.0007   | 0.0006   | 0.0008   | 0.0018   | 0.0083   | 0.0016   | 0.0012   | 0.0011   | 0.0011   | 0.0079   |
| LNA-C               | AON32       | 0.0008   | 0.0005   | 0.0006   | 0.0008   | 0.0082   | 0.0014   | 0.0011   | 0.0010   | 0.0012   | 0.0105   |
| 7'R-cLNA-C          | AON15       | 0.0035   | 0.0013   | 0.0020   | 0.0013   | 0.0029   | 0.0010   | 0.0006   | 0.0005   | 0.0007   | 0.0020   |
| 7'S-cLNA-C          | AON18       | 0.0021   | 0.0009   | 0.0011   | 0.0008   | 0.0011   | 0.0006   | 0.0004   | 0.0003   | 0.0003   | 0.0007   |
| LNA-C               | AON33       | 0.0039   | 0.0007   | 0.0020   | 0.0009   | 0.0031   | 0.0005   | 0.0003   | 0.0003   | 0.0005   | 0.0009   |
| 7'R-cLNA-T          | AON19       | 0.0012   | 0.0012   | 0.0024   | 0.0023   | 0.0079   | 0.0018   | 0.0014   | 0.0014   | 0.0016   | 0.0082   |
| 7'S-cLNA-T          | AON22       | 0.0011   | 0.0012   | 0.0023   | 0.0021   | 0.0058   | 0.0018   | 0.0015   | 0.0016   | 0.0019   | 0.0105   |
| LNA-T               | AON34       | 0.0007   | 0.0006   | 0.0021   | 0.0021   | 0.0086   | 0.0012   | 0.0009   | 0.0011   | 0.0015   | 0.0118   |
| 7'R-cLNA-T          | AON20       | 0.0023   | 0.0009   | 0.0006   | 0.0007   | 0.0017   | 0.0007   | 0.0006   | 0.0007   | 0.0007   | 0.0015   |
| 7'S-cLNA-T          | AON23       | 0.0030   | 0.0008   | 0.0007   | 0.0008   | 0.0017   | 0.0006   | 0.0007   | 0.0010   | 0.0011   | 0.0031   |
| LNA-T               | AON35       | 0.0039   | 0.0005   | 0.0005   | 0.0006   | 0.0021   | 0.0005   | 0.0005   | 0.0008   | 0.0010   | 0.0035   |
| 7'R-cLNA-T          | AON21       | 0.0024   | 0.0013   | 0.0016   | 0.0008   | 0.0009   | 0.0004   | 0.0003   | 0.0004   | 0.0006   | 0.0015   |
| 7'S-cLNA-T          | AON24       | 0.0022   | 0.0014   | 0.0017   | 0.0009   | 0.0010   | 0.0005   | 0.0004   | 0.0005   | 0.0007   | 0.0013   |
| LNA-T               | AON36       | 0.0026   | 0.0006   | 0.0019   | 0.0006   | 0.0010   | 0.0004   | 0.0003   | 0.0003   | 0.0006   | 0.0019   |



**Table SII.3.** Cleavage products composition (%) grouped by the sequence context with purine (*Pu*) or pyrimidine (*Py*) nucleotide on the 3'-end as 5'-ApPu-3' (cleavage sites 5'-A<sup>1</sup>pA<sup>2</sup>-3' and 5'-A<sup>13</sup>pG<sup>14</sup>-3'), 5'-ApPy-3' (5'-A<sup>2</sup>pU<sup>3</sup>-3', 5'-A<sup>6</sup>pU<sup>7</sup>-3' and 5'-A<sup>11</sup>pC<sup>12</sup>-3'), 5'-GpPu-3' (5'-G<sup>19</sup>pA<sup>20</sup>-3', 5'-G<sup>14</sup>pG<sup>15</sup>-3', 5'-G<sup>17</sup>pG<sup>18</sup>-3', and 5'-G<sup>18</sup>pG<sup>19</sup>-3'), 5'-GpPy-3' (5'-G<sup>8</sup>pU<sup>9</sup>-3', 5'-G<sup>4</sup>pC<sup>5</sup>-3' and 5'-G<sup>15</sup>pC<sup>16</sup>-3'), 5'-UpPu-3' (5'-U<sup>3</sup>pG<sup>4</sup>-3' and 5'-U<sup>7</sup>pG<sup>8</sup>-3'), 5'-UpPy-3' (5'-U<sup>9</sup>pG<sup>10</sup>-3') and 5'-CpPu-3' (5'-C<sup>5</sup>pA<sup>6</sup>-3', 5'-C<sup>10</sup>pA<sup>11</sup>-3', 5'-C<sup>12</sup>pA<sup>13</sup>-3', and 5'-C<sup>16</sup>pG<sup>17</sup>-3') as well as grouped by nucleotide on the 5'-end. Individual cleavage site products are reported in details in Table SII.2 in SI Part II.

| AON    | Position   | Modification | ApPu, % | ApPy, % | GpPu, % | GpPy, % | UpPu, % | UpPy, % | CpPu, % | ApN, % | GpN, % | UpN, % | CpN, % | Products, % |
|--------|------------|--------------|---------|---------|---------|---------|---------|---------|---------|--------|--------|--------|--------|-------------|
| Native |            |              | 6       | 10      | 13      | 31      | 2       | 2       | 10      | 16     | 44     | 4      | 10     | 75          |
| AON1   |            | 7'R-cLNA-A   | 6       | 16      | 14      | 21      | 2       | 2       | 14      | 22     | 35     | 4      | 14     | 75          |
| AON4   | <b>A3</b>  | 7'S-cLNA-A   | 5       | 11      | 14      | 19      | 1       | 2       | 13      | 17     | 33     | 3      | 13     | 66          |
| AON25  |            | LNA-A        | 6       | 12      | 15      | 20      | 2       | 2       | 15      | 18     | 34     | 3      | 15     | 70          |
| AON2   |            | 7'R-cLNA-A   | 3       | 4       | 16      | 32      | 0       | 1       | 9       | 7      | 48     | 1      | 9      | 65          |
| AON5   | <b>A7</b>  | 7'S-cLNA-A   | 4       | 5       | 17      | 24      | 1       | 2       | 11      | 9      | 41     | 3      | 11     | 64          |
| AON26  |            | LNA-A        | 4       | 4       | 17      | 31      | 1       | 1       | 11      | 8      | 47     | 2      | 11     | 68          |
| AON3   |            | 7'R-cLNA-A   | 3       | 6       | 13      | 42      | 4       | 3       | 10      | 8      | 55     | 7      | 10     | 81          |
| AON6   | <b>A9</b>  | 7'S-cLNA-A   | 3       | 5       | 13      | 45      | 4       | 5       | 10      | 9      | 58     | 9      | 10     | 85          |
| AON27  |            | LNA-A        | 1       | 3       | 10      | 63      | 4       | 6       | 9       | 4      | 73     | 11     | 9      | 97          |
| AON7   |            | 7'R-cLNA-G   | 6       | 6       | 16      | 21      | 1       | 2       | 11      | 13     | 37     | 3      | 11     | 64          |
| AON10  |            | 7'S-cLNA-G   | 6       | 6       | 14      | 25      | 1       | 2       | 11      | 12     | 39     | 3      | 11     | 66          |
| AON28  | <b>G5</b>  | LNA-G        | 7       | 7       | 14      | 25      | 2       | 2       | 11      | 13     | 39     | 3      | 11     | 67          |
| AON8   |            | 7'R-cLNA-G   | 3       | 10      | 11      | 51      | 5       | 5       | 9       | 12     | 62     | 10     | 9      | 93          |
| AON11  | <b>G10</b> | 7'S-cLNA-G   | 2       | 13      | 7       | 51      | 5       | 3       | 7       | 15     | 58     | 8      | 7      | 88          |
| AON29  |            | LNA-G        | 3       | 8       | 10      | 52      | 6       | 4       | 8       | 11     | 62     | 10     | 8      | 92          |
| AON9   |            | 7'R-cLNA-G   | 5       | 13      | 5       | 54      | 5       | 5       | 11      | 18     | 59     | 10     | 11     | 98          |
| AON12  | <b>G16</b> | 7'S-cLNA-G   | 3       | 7       | 4       | 66      | 7       | 5       | 8       | 10     | 70     | 11     | 8      | 99          |
| AON30  |            | LNA-G        | 5       | 14      | 4       | 56      | 5       | 4       | 10      | 18     | 61     | 10     | 10     | 98          |
| AON13  |            | 7'R-cLNA-C   | 7       | 11      | 15      | 22      | 1       | 1       | 12      | 18     | 37     | 3      | 12     | 70          |

|       |            |            |   |    |    |    |   |   |    |    |    |    |    |    |
|-------|------------|------------|---|----|----|----|---|---|----|----|----|----|----|----|
| AON16 | <b>C4</b>  | 7'S-cLNA-C | 9 | 14 | 16 | 23 | 2 | 2 | 14 | 23 | 38 | 4  | 14 | 78 |
| AON31 |            | LNA-C      | 8 | 11 | 13 | 24 | 1 | 2 | 10 | 19 | 37 | 3  | 10 | 69 |
| AON14 | <b>C8</b>  | 7'R-cLNA-C | 3 | 5  | 15 | 32 | 2 | 2 | 12 | 9  | 47 | 4  | 12 | 71 |
| AON17 |            | 7'S-cLNA-C | 3 | 6  | 15 | 36 | 2 | 3 | 11 | 10 | 51 | 6  | 11 | 77 |
| AON32 |            | LNA-C      | 3 | 6  | 12 | 35 | 2 | 2 | 9  | 9  | 47 | 4  | 9  | 70 |
| AON15 | <b>C15</b> | 7'R-cLNA-C | 7 | 13 | 9  | 44 | 4 | 4 | 13 | 20 | 53 | 8  | 13 | 94 |
| AON18 |            | 7'S-cLNA-C | 4 | 11 | 5  | 56 | 6 | 5 | 11 | 15 | 61 | 11 | 11 | 98 |
| AON33 |            | LNA-C      | 6 | 15 | 6  | 51 | 4 | 4 | 10 | 22 | 57 | 8  | 10 | 97 |
| AON19 | <b>T6</b>  | 7'R-cLNA-T | 7 | 6  | 19 | 26 | 1 | 2 | 14 | 13 | 46 | 4  | 14 | 76 |
| AON22 |            | 7'S-cLNA-T | 7 | 6  | 21 | 19 | 1 | 2 | 13 | 13 | 40 | 4  | 13 | 70 |
| AON34 |            | LNA-T      | 7 | 4  | 16 | 27 | 1 | 1 | 10 | 11 | 44 | 2  | 10 | 66 |
| AON20 | <b>T11</b> | 7'R-cLNA-T | 2 | 9  | 8  | 56 | 6 | 5 | 10 | 11 | 64 | 11 | 10 | 96 |
| AON23 |            | 7'S-cLNA-T | 2 | 12 | 11 | 45 | 6 | 5 | 10 | 14 | 55 | 11 | 10 | 91 |
| AON35 |            | LNA-T      | 2 | 13 | 9  | 50 | 6 | 3 | 7  | 15 | 58 | 9  | 7  | 90 |
| AON21 | <b>T13</b> | 7'R-cLNA-T | 5 | 10 | 6  | 52 | 6 | 6 | 11 | 15 | 58 | 12 | 11 | 96 |
| AON24 |            | 7'S-cLNA-T | 6 | 10 | 7  | 50 | 7 | 6 | 12 | 15 | 57 | 12 | 12 | 96 |
| AON36 |            | LNA-T      | 6 | 9  | 5  | 56 | 6 | 4 | 8  | 15 | 62 | 9  | 8  | 95 |

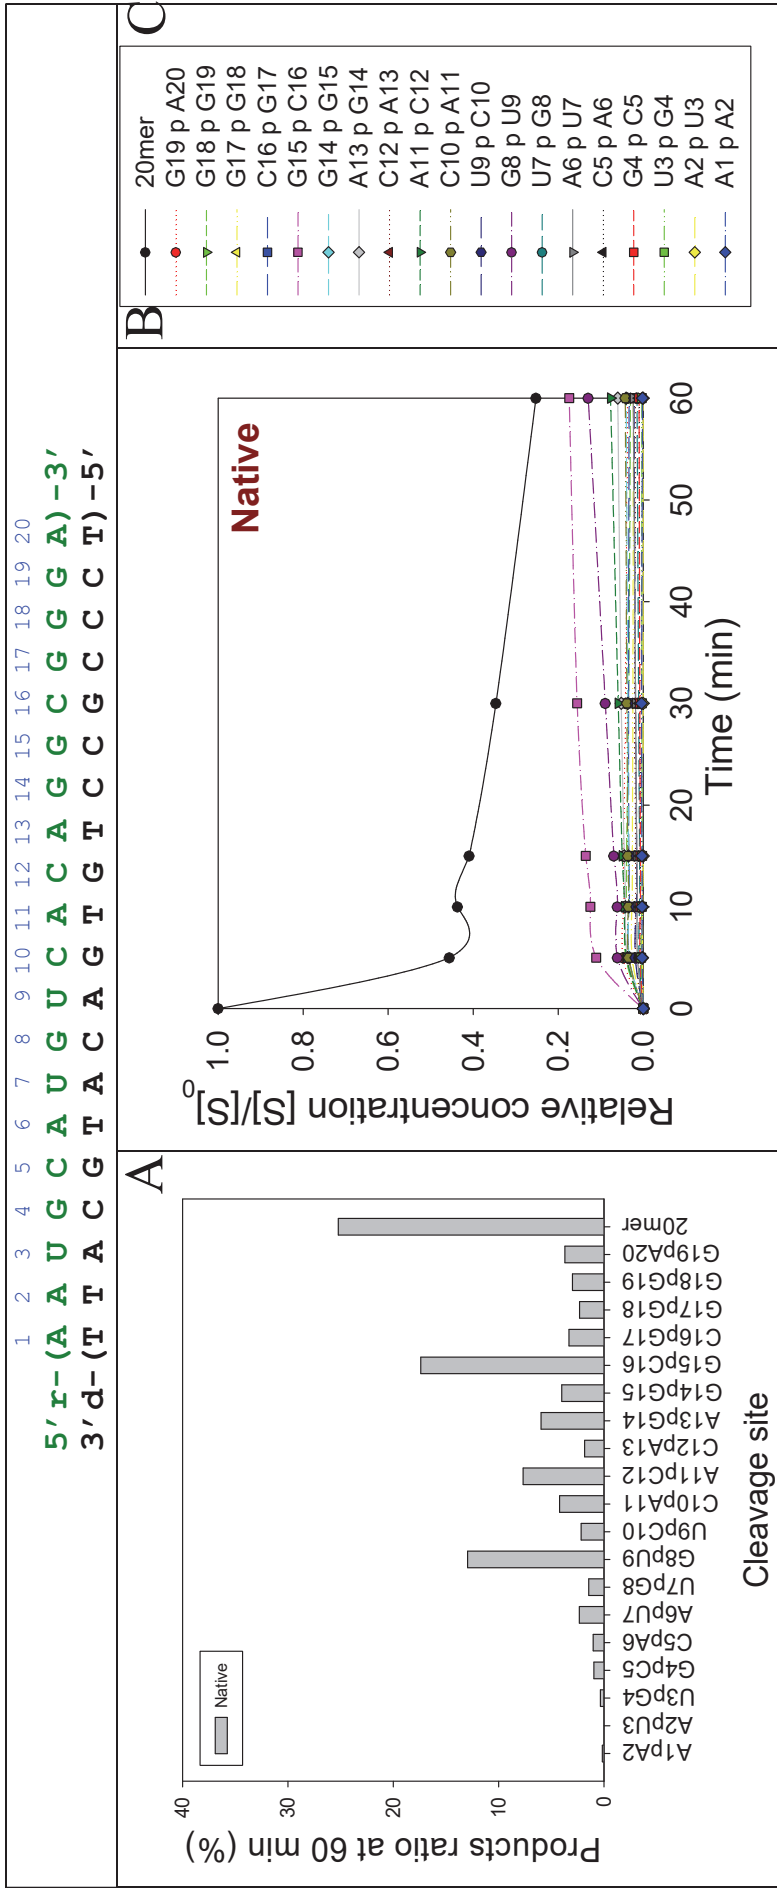

**Figure SII.62.** *E. coli* RNase H promoted cleavage of the native AON/RNA. **Inset A** shows product ratio (in %) at 60 minutes, **Inset B** is time dependence of the relative concentrations  $[S]/[S]_0$  of initial 20mer AON/RNA duplexes and all cleavage products normalized by the initial substrate concentration  $[S]_0 = 0.1 \mu\text{M}$ . Spline interpolation was used to connect experimental points. **Inset C** is a colour code card to time dependences shown in **Inset B**. **Enzymatic assay conditions:** Target  $0.1 \mu\text{M}$  RNA (specific activity  $80\,000 \text{ cpm}$ ) and AON ( $2 \mu\text{M}$ ) were incubated in a buffer containing  $20 \text{ mM}$  Tris-HCl (pH 7.5),  $20 \text{ mM}$  KCl,  $10 \text{ mM}$  MgCl<sub>2</sub>,  $0.1 \text{ mM}$  EDTA, and  $0.1 \text{ mM}$  DTT at  $21^\circ\text{C}$  in the presence of  $0.08 \text{ U}$  *E. coli* RNase H.

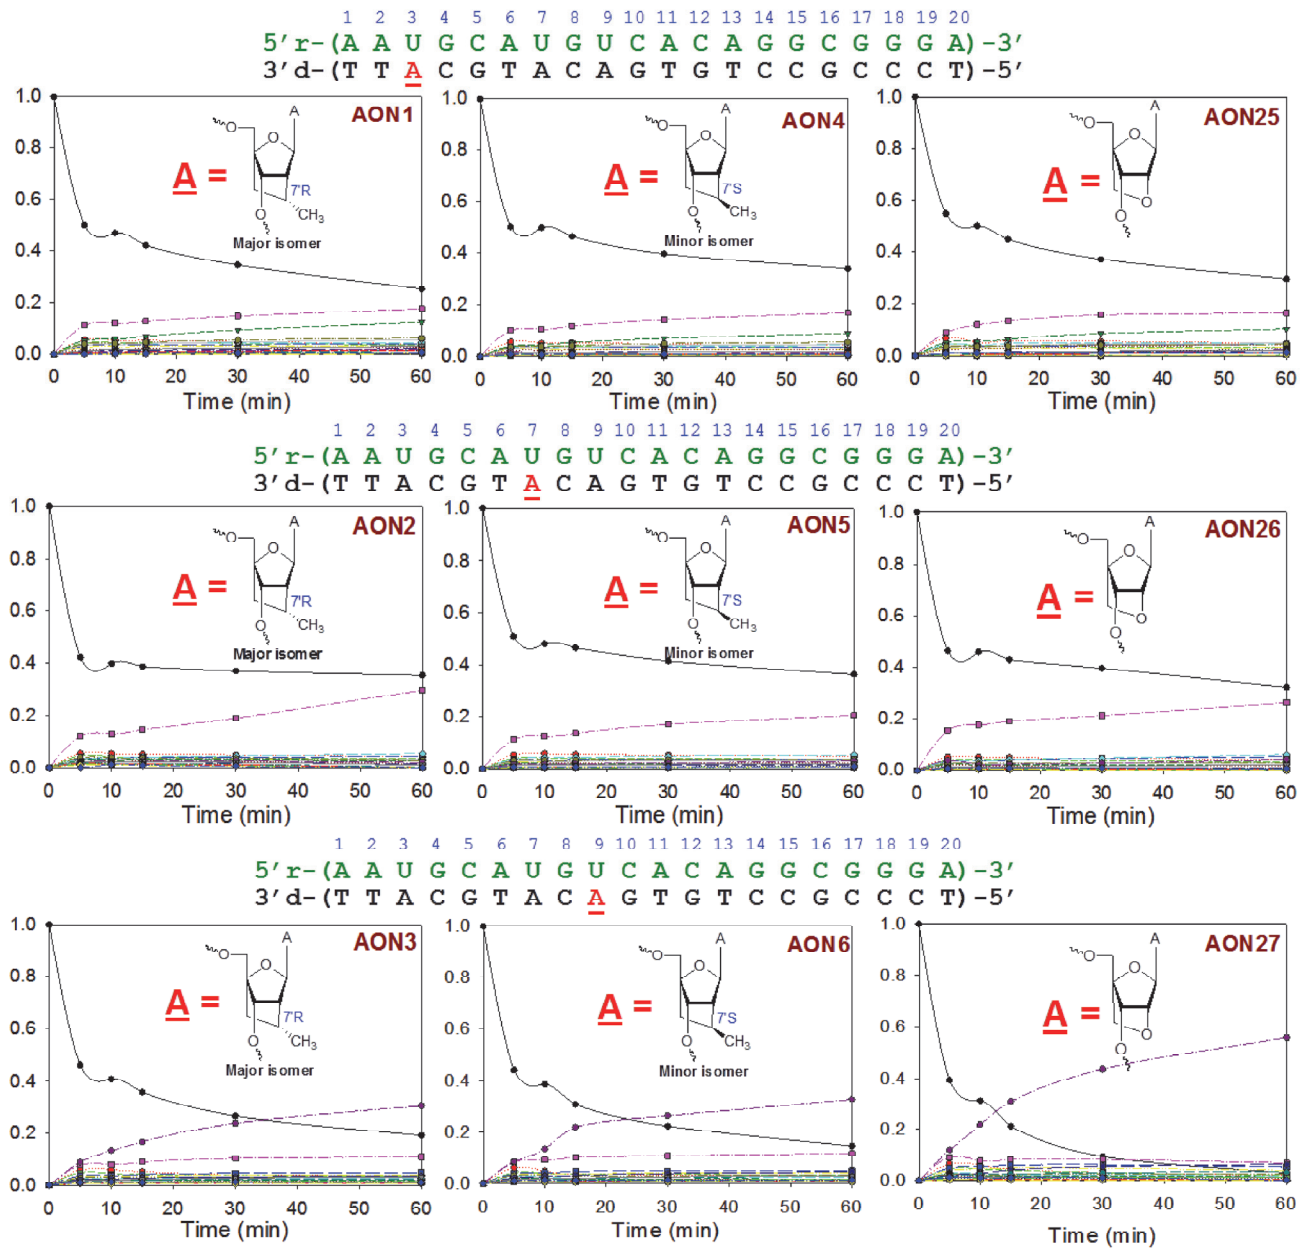

**Figure SII.63.** *E. coli* RNase H promoted cleavage of AON1-6,25-27/RNA heteroduplexes containing modified nucleotides A = 7'R-Me-cLNA-A (AON1-3) or 7'S-Me-cLNA-A (AON4-6) or LNA-A (AON25-27) quantified as time dependence of the relative concentrations  $[S]/[S]_0$  of initial 20mer AON/RNA duplexes and all cleavage products normalized by the initial substrate concentration  $[S]_0 = 0.1 \mu\text{M}$ . Corresponding AON sequences, positions and types of modifications are shown. Spline interpolation was used to connect experimental points. Colour code and enzymatic assay conditions are as described in the caption of Figure SII.61.

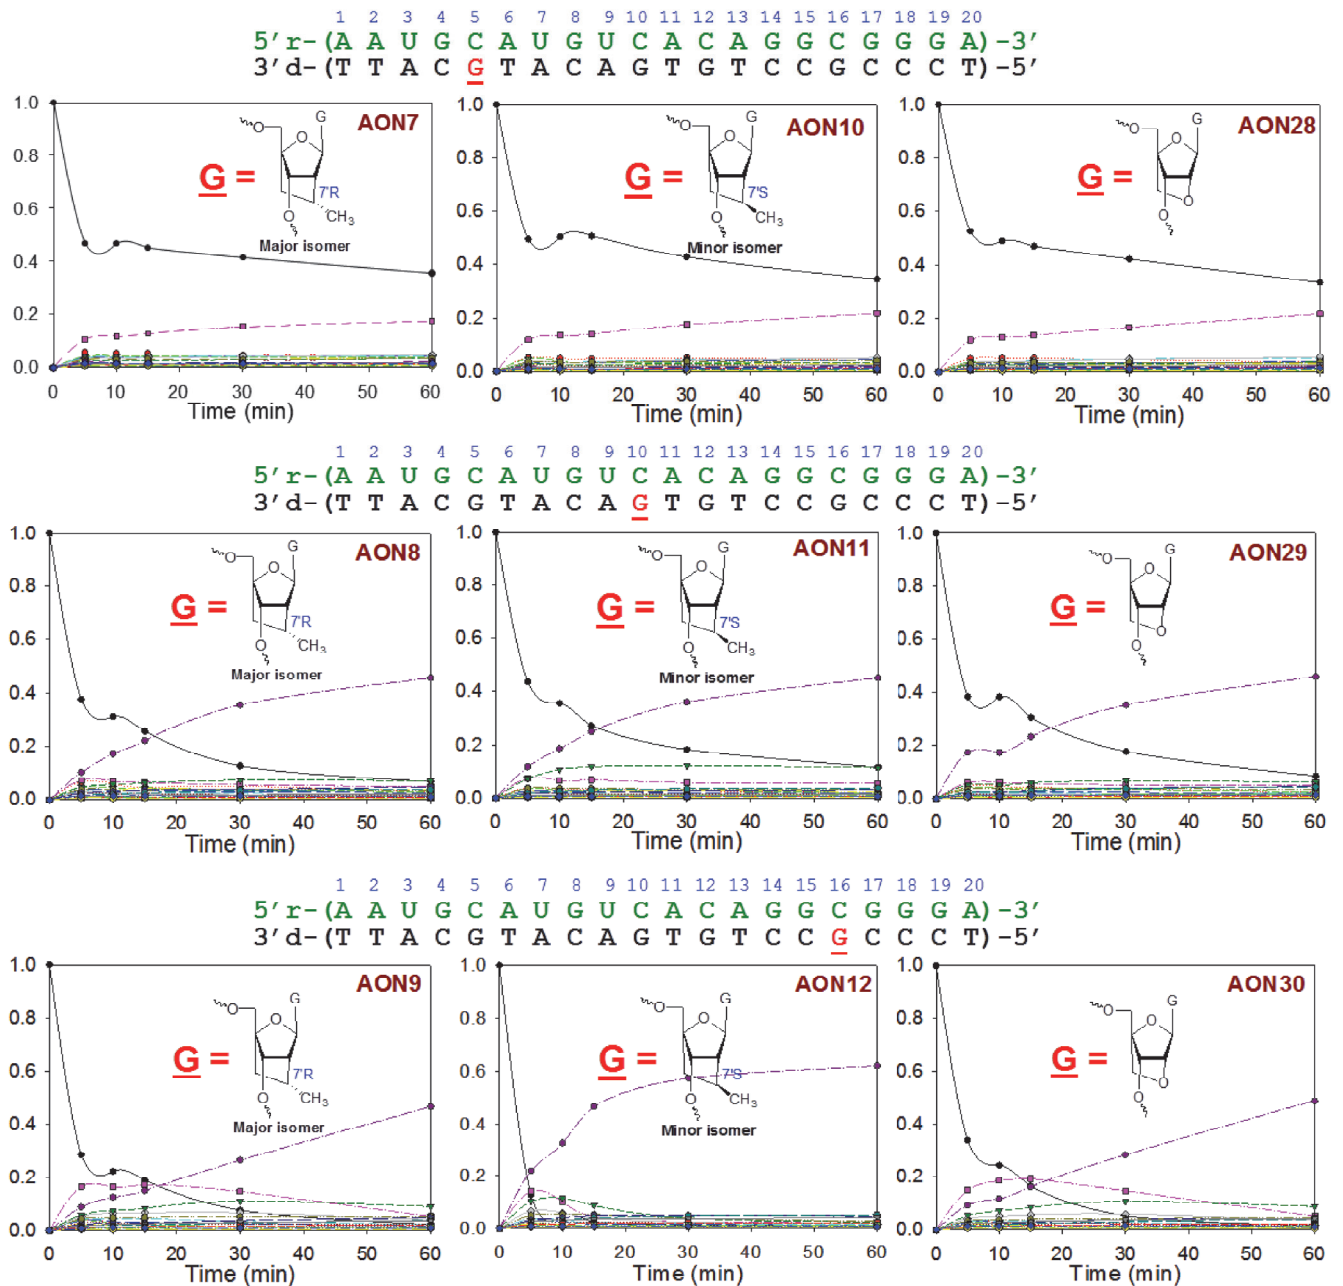

**Figure SII.64.** *E. coli* RNase H promoted cleavage of AON7-12,28-30/RNA heteroduplexes containing modified nucleotides G = 7'R-Me-cLNA-G (AON7-9) or 7'S-Me-cLNA-G (AON10-12) or LNA-G (AON28-30) quantified as time dependence of the relative concentrations  $[S]/[S]_0$  of initial 20mer AON/RNA duplexes and all cleavage products normalized by the initial substrate concentration  $[S]_0 = 0.1 \mu\text{M}$ . Corresponding AON sequences, positions and types of modifications are shown. Colour code and enzymatic assay conditions are as described in the caption of Figure SII.61.

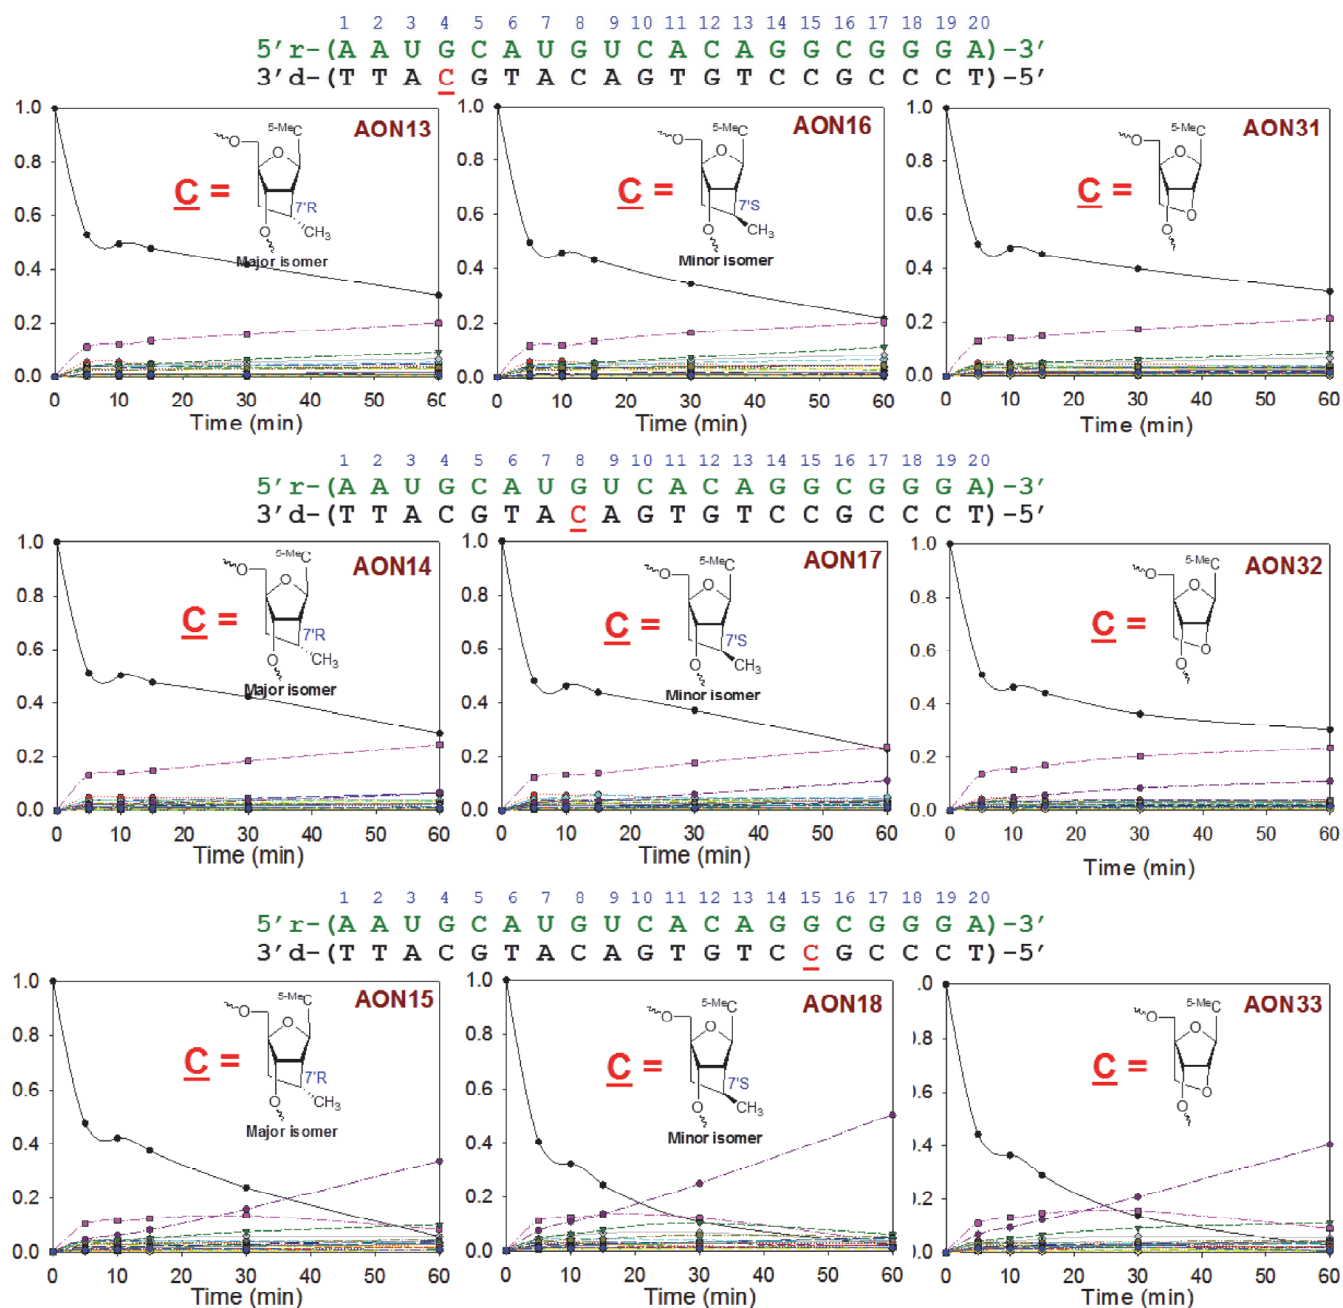

**Figure SII.65.** *E. coli* RNase H promoted cleavage of AON13-18,31-33/RNA heteroduplexes containing modified nucleotides C = 7'R-Me-cLNA-<sup>5-Me</sup>C (AON13-15) or 7'S-Me-cLNA-<sup>5-Me</sup>C (AON16-18) or LNA-<sup>5-Me</sup>C (AON31-33) quantified as time dependence of the relative concentrations  $[S]/[S]_0$  of initial 20mer AON/RNA duplexes and all cleavage products normalized by the initial substrate concentration  $[S]_0 = 0.1 \mu\text{M}$ . Corresponding AON sequences, positions and types of modifications are shown. Colour code and enzymatic assay conditions are as described in the caption of Figure SII.61.

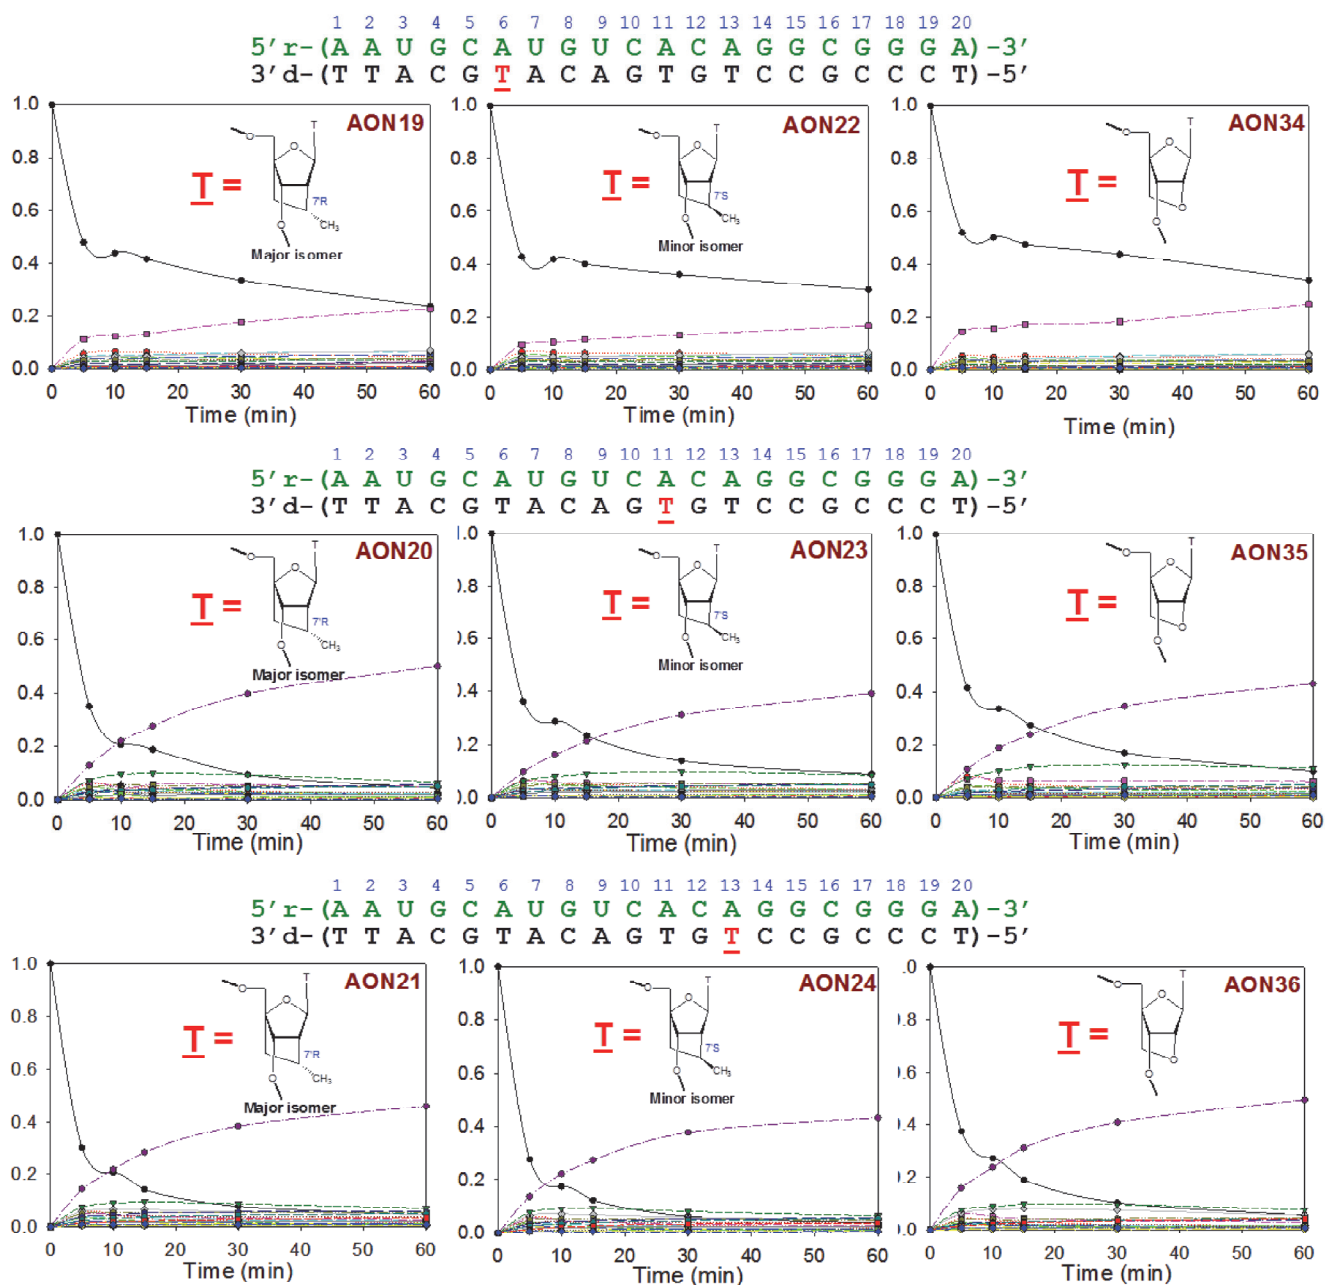

**Figure SII.66.** *E. coli* RNase H promoted cleavage of AON19-24,34-35/RNA heteroduplexes containing modified nucleotides T = 7'R-Me-cLNA-T (AON19-21) or 7'S-Me-cLNA-T (AON22-24) or LNA-T (AON34-35) quantified as time dependence of the relative concentrations  $[S]/[S]_0$  of initial 20mer AON/RNA duplexes and all cleavage products normalized by the initial substrate concentration  $[S]_0 = 0.1 \mu\text{M}$ . Corresponding AON sequences, positions and types of modifications are shown. Colour code and enzymatic assay conditions are as described in the caption of Figure SII.61.



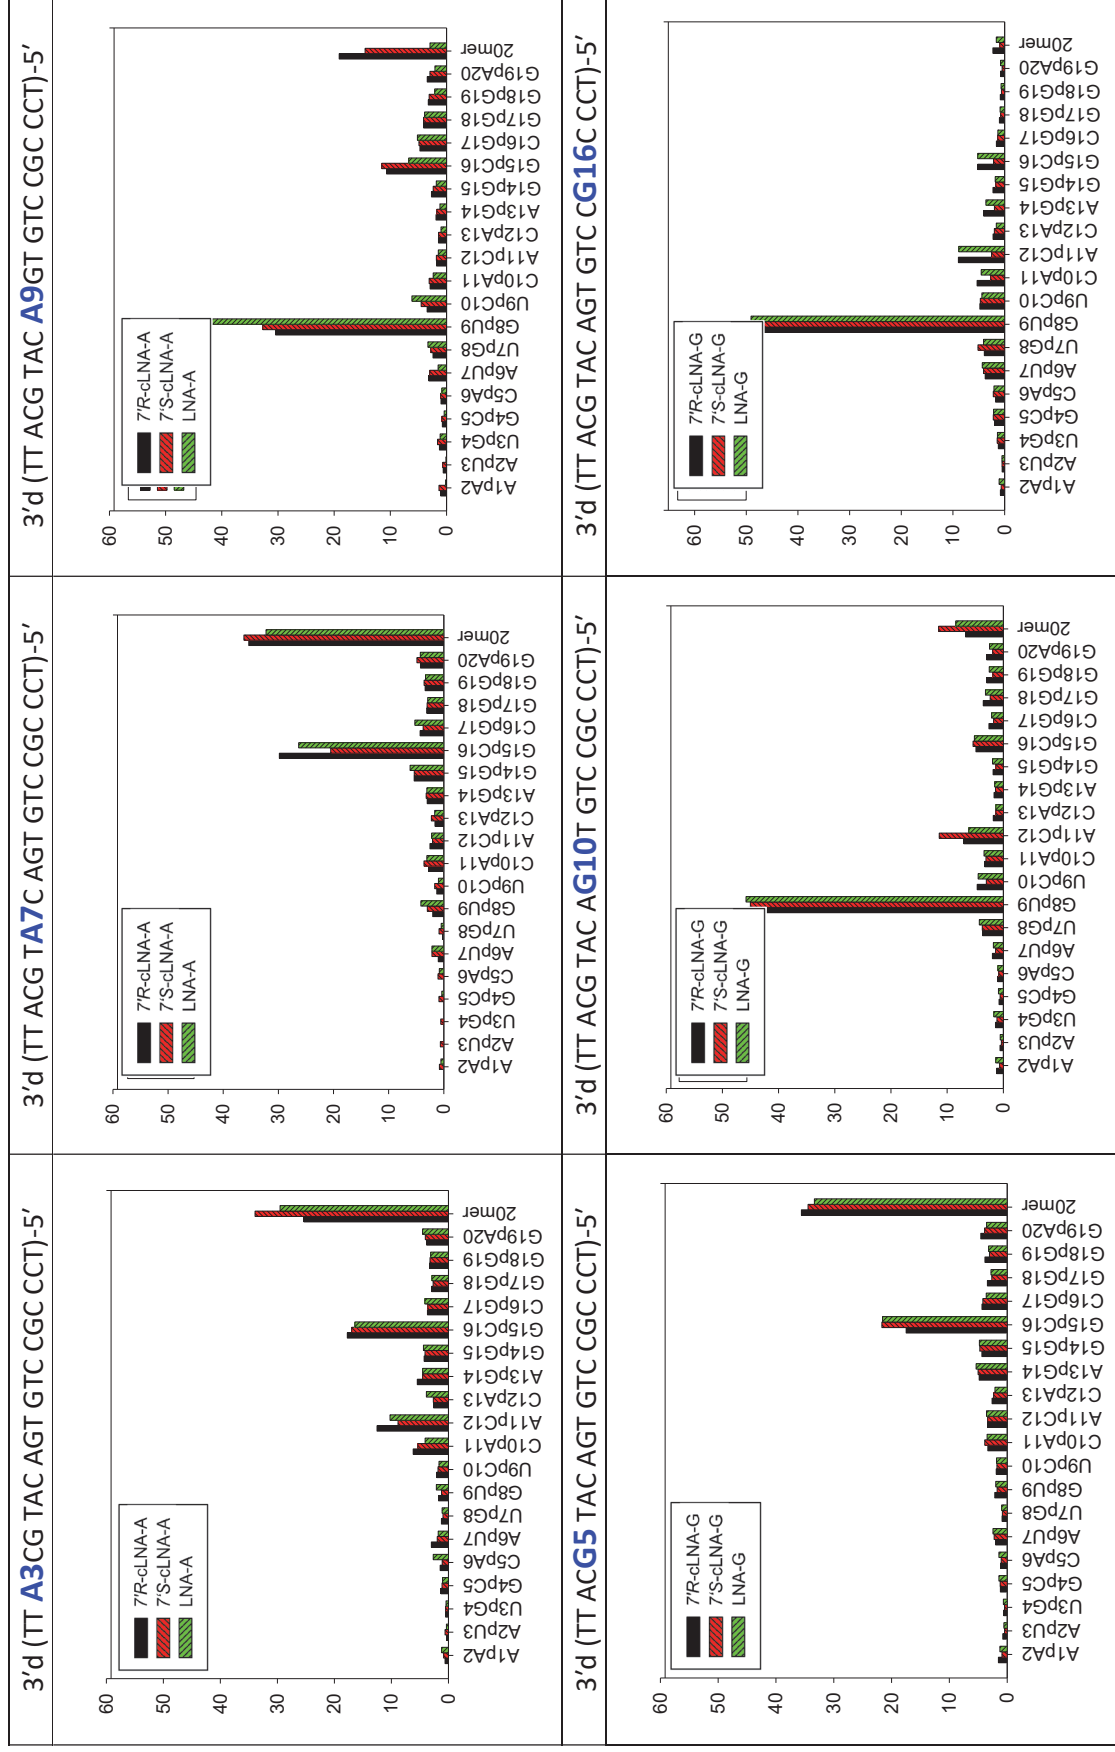

**Figure SII.67.** Relative concentrations of various products formed due to RNase H promoted degradation of RNA in native and AONI-36/RNA hybrid duplexes. The measurement is taken at 60 minutes from the start of the reaction and concentrations are normalized by initial substrate concentration  $[S]_0 = 0.1 \mu\text{M}$

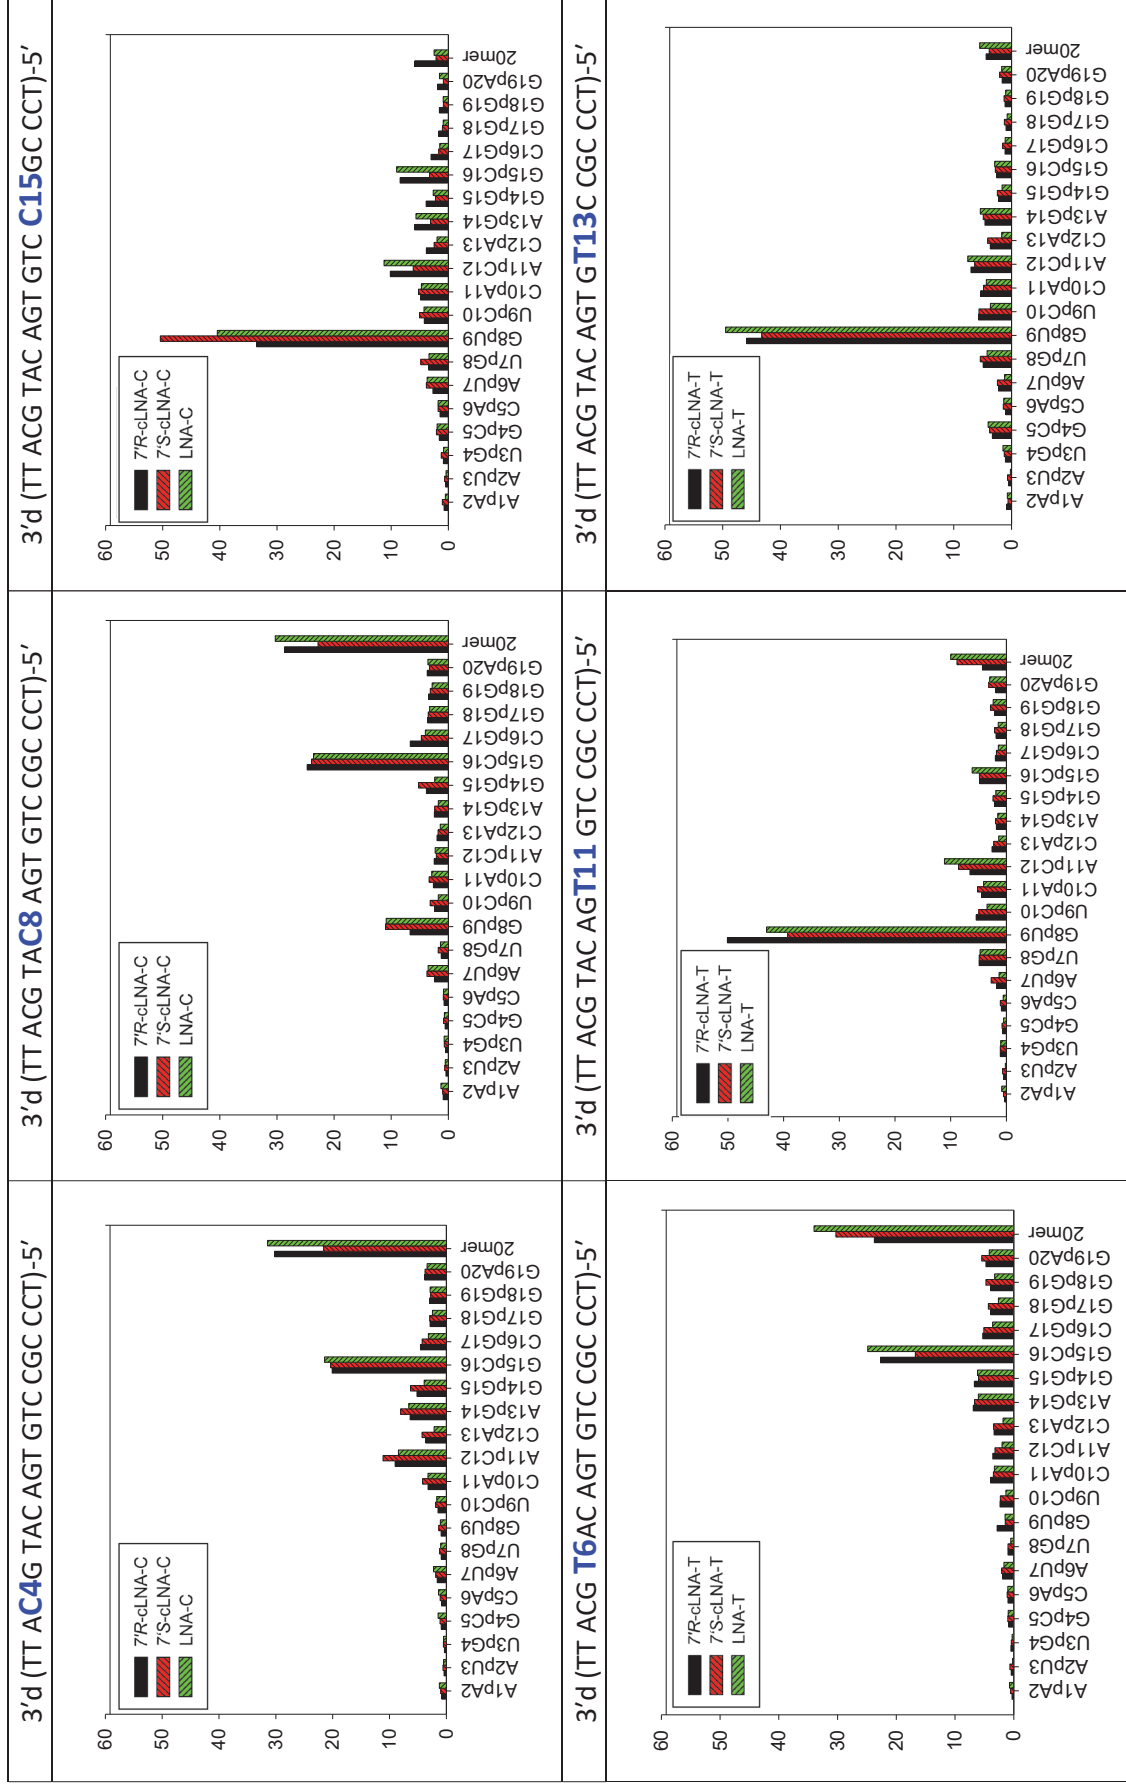

Figure SII.67. (continue)
